# Supplementary material
Source: PubMed Central journal article supplement (PMC4976021)
Supplement: NIHMS795265-supplement-1.pdf [file NIHMS795265-supplement-1.pdf]

## Supplemental material

### Sort

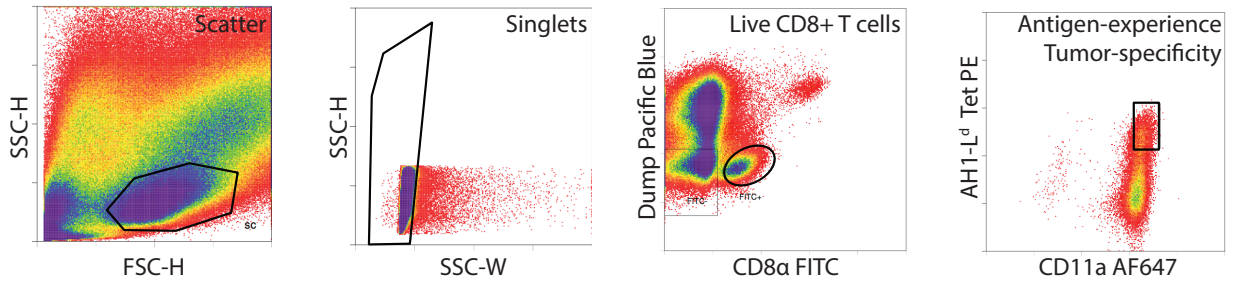

### Post sort

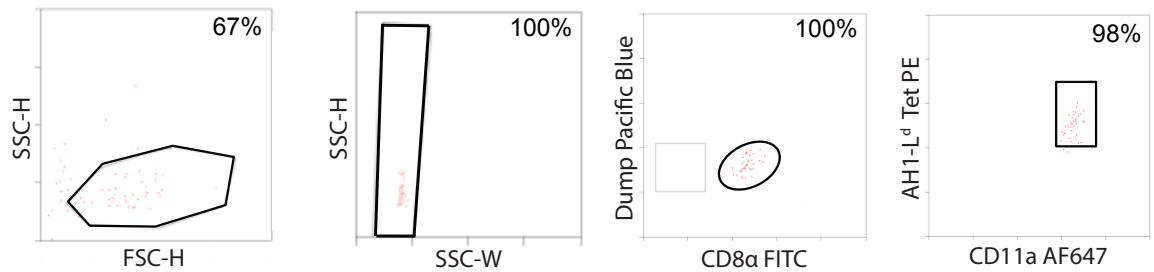

**Supplemental Figure 1. Tumor-specific CD8<sup>+</sup> T cells were isolated for microarray analysis from the timelines illustrated in Figure 2A.** Representative FAC-sort of CD8<sup>+</sup> 7-AAD<sup>-</sup> CD4<sup>-</sup> B220<sup>-</sup> MHC-II<sup>-</sup> CD11a<sup>+</sup> AH1-L<sup>d</sup> Tet<sup>+</sup> cells from a tumor sample is shown. The “Dump” collectively refers to 7-AAD<sup>+</sup>, CD4<sup>+</sup>, B220<sup>+</sup>, and MHC-II<sup>+</sup>. For each sample, βgal-L<sup>d</sup> Tet was used as a negative control to set AH1-L<sup>d</sup> Tet gates. After FAC-sorts, all samples were 90-100% pure tumor-specific CD8<sup>+</sup> T cells.

**Supplemental Table 1. Transcriptional profiles of published T cell programs compared to tumor-specific TIL**

| T cell program of interest                            | Exhausted (overexpressed)                 | Exhausted (underexpressed)                                                                              | Memory (overexpressed)                 | Memory (underexpressed)                                                                                    | Effector (overexpressed)                 | Effector (underexpressed)                                                                                 |
|-------------------------------------------------------|-------------------------------------------|---------------------------------------------------------------------------------------------------------|----------------------------------------|------------------------------------------------------------------------------------------------------------|------------------------------------------|-----------------------------------------------------------------------------------------------------------|
| T cell programs compared for relative gene expression | Exhausted virus-specific CD8+ T cells vs. | Naïve virus-specific CD8+ T cells; also not in memory and effector vs naïve virus-specific CD8+ T cells | Memory virus-specific CD8+ T cells vs. | Naïve virus-specific CD8+ T cells; also not in exhausted and effector vs naïve virus-specific CD8+ T cells | Effector virus-specific CD8+ T cells vs. | Naïve virus-specific CD8+ T cells; also not in memory, and exhausted vs naïve virus-specific CD8+ T cells |
|                                                       | Naïve virus-specific CD8+ T cells         | Naïve virus-specific CD8+ T cells                                                                       | Naïve virus-specific CD8+ T cells      | Naïve virus-specific CD8+ T cells                                                                          | Naïve virus-specific CD8+ T cells        | Naïve virus-specific CD8+ T cells                                                                         |
| Reference                                             | Wherry EJ et al. 2007                     | Wherry EJ et al. 2007                                                                                   | Wherry EJ et al. 2007                  | Wherry EJ et al. 2007                                                                                      | Wherry EJ et al. 2007                    | Wherry EJ et al. 2007                                                                                     |
| Gene set                                              | 1110067D22Rik                             | 1110038D17Rik                                                                                           | 6330512M04Rik                          | 2610019F03Rik                                                                                              | 1110008P14Rik                            | 1190002H23Rik                                                                                             |
|                                                       | 1810035L17Rik/Nrp                         | 1190002H23Rik                                                                                           | Acot7                                  | Actn1                                                                                                      | 2810417H13Rik                            | 2610019F03Rik                                                                                             |
|                                                       | 2810417H13Rik                             | 2610019F03Rik                                                                                           | Ahnak                                  | Blk                                                                                                        | Acot7                                    | 5730403B10Rik/Hmox2                                                                                       |
|                                                       | 5730469M10Rik                             | 2810407C02Rik                                                                                           | Anxa1                                  | Ccr7                                                                                                       | Actb                                     | Abca1                                                                                                     |
|                                                       | 6330403K07Rik                             | 4833420G17Rik                                                                                           | Anxa2                                  | Cd24a                                                                                                      | Adam19                                   | Accs1                                                                                                     |
|                                                       | Acot7                                     | 4922505G16Rik/Rpn2                                                                                      | Aqp9                                   | Cd74                                                                                                       | Ahnak                                    | Actn1                                                                                                     |
|                                                       | Adam19                                    | A630038E17Rik                                                                                           | AW112010                               | Cd79b                                                                                                      | Aim1                                     | Amd-Ps6                                                                                                   |
|                                                       | Ahnak                                     | Abca1                                                                                                   | Bag3                                   | Cnn3                                                                                                       | Anxa1                                    | Amd1/Amd2                                                                                                 |
|                                                       | Alcam                                     | Abce1                                                                                                   | Bhlhe40                                | Cxnc5                                                                                                      | Anxa2                                    | Amd1/Amd2                                                                                                 |
|                                                       | Anxa2                                     | Abim1                                                                                                   | Casp1                                  | Ddit4                                                                                                      | Apobec2                                  | Amd1/Amd2                                                                                                 |
|                                                       | Art3                                      | Acadm                                                                                                   | Ccl5                                   | Dntt                                                                                                       | Atp5l                                    | Apex1/Tmem55b                                                                                             |
|                                                       | Atf1/Gm1862                               | Acp5                                                                                                    | Ccr2                                   | Gsn                                                                                                        | Atp5l                                    | Bcl2                                                                                                      |
|                                                       | Atf1/Gm1862                               | Accs1                                                                                                   | Ccr5/Ccr2                              | H2-Aa                                                                                                      | AW112010                                 | Bzw2                                                                                                      |
|                                                       | AW112010                                  | Actb                                                                                                    | Cebpb/Tmem189                          | H2-Ea-ps                                                                                                   | Bag3                                     | Ccnd2                                                                                                     |
|                                                       | Bag3                                      | Actn1                                                                                                   | Crtam                                  | H2-Eb1                                                                                                     | Bhlhe40                                  | Ccr7                                                                                                      |
|                                                       | BC055004                                  | Adcy7                                                                                                   | Ctla2a                                 | Idh2                                                                                                       | Birc5                                    | Cd72/Tesk1                                                                                                |
|                                                       | Bhlhe40                                   | Add1                                                                                                    | Ctla2b                                 | Igf1bp4                                                                                                    | Bub1                                     | Clk1                                                                                                      |
|                                                       | Bub1                                      | Adh5                                                                                                    | Ctla4                                  | Igk-V28                                                                                                    | C330027C09Rik                            | Clk4                                                                                                      |
|                                                       | C330007P06Rik                             | Akap8                                                                                                   | Cxcr3                                  | Il6ra                                                                                                      | Capn2                                    | Cnn3                                                                                                      |
|                                                       | C330027C09Rik                             | Anapc5                                                                                                  | Ddx6                                   | Il6st                                                                                                      | Casp1                                    | Ctsl                                                                                                      |
|                                                       | Capzb                                     | Arhgap1                                                                                                 | Dock5                                  | Igae                                                                                                       | Casp3                                    | Ctss                                                                                                      |
|                                                       | Car2                                      | Arhgef1                                                                                                 | Dusp1                                  | Kif23                                                                                                      | Ccdc50                                   | Cxcr4                                                                                                     |
|                                                       | Casp1                                     | Arl4c                                                                                                   | Eil2                                   | Lef1                                                                                                       | Ccl5                                     | Cxcs5                                                                                                     |
|                                                       | Casp3                                     | Asce1                                                                                                   | Emp1                                   | Lyz2                                                                                                       | Ccl9                                     | Ddx3x                                                                                                     |
|                                                       | Casp4                                     | Atp13a3                                                                                                 | Eomes                                  | Ms4a1                                                                                                      | Ccnb1/Gm5593                             | Dgka                                                                                                      |
|                                                       | Ccdc50                                    | Atp6v0a2                                                                                                | Errfi1                                 | Myb                                                                                                        | Ccnb2                                    | Dnajb2                                                                                                    |
|                                                       | Ccl3                                      | Atp6v0b                                                                                                 | F2r                                    | Pdk1                                                                                                       | Ccr2                                     | Dnajc7/Nkiras2                                                                                            |
|                                                       | Ccl4                                      | Bnip3/LOC100044398/Gm10480                                                                              | Fas1                                   | Piga                                                                                                       | Ccr5/Ccr2                                | Dntt                                                                                                      |
|                                                       | Ccl5                                      | Bzw1                                                                                                    | Fcgr2b                                 | Ppic                                                                                                       | Cd48                                     | Dph5                                                                                                      |
|                                                       | Ccnb1/Gm5593                              | Bzw2                                                                                                    | Fos                                    | Rab3ip                                                                                                     | Cdc6                                     | Dtx1/Gm19706                                                                                              |
|                                                       | Ccnb2                                     | Ccnd2                                                                                                   | Fosb                                   | Ramp1                                                                                                      | Cdk1                                     | Dusp1                                                                                                     |
|                                                       | Ccr5/Ccr2                                 | Ccr7                                                                                                    | Gm6742                                 | Scd1                                                                                                       | Cks1b/Gm6340                             | Dusp6                                                                                                     |
|                                                       | Ccr2                                      | Cct3                                                                                                    | Gm7278                                 | Sfmbt2                                                                                                     | Cks2                                     | Eif4a2                                                                                                    |
|                                                       | Cd160                                     | Cct4                                                                                                    | Gp49a                                  | Smc4                                                                                                       | Clic1                                    | Eif4g1                                                                                                    |
|                                                       | Cd200                                     | Cct5                                                                                                    | Gzmb                                   | St6gal1                                                                                                    | Cma1                                     | Eif5/LOC100047658                                                                                         |
|                                                       | Cd244/LOC677008                           | Cct8                                                                                                    | Gzmk                                   | Tec                                                                                                        | Cox17                                    | Elov15                                                                                                    |
|                                                       | Cd7                                       | Cd1d1                                                                                                   | Gzmm                                   | Trim59                                                                                                     | Cripl                                    | Emb                                                                                                       |
|                                                       | Cd84                                      | Cd1d2                                                                                                   | H2-Q10                                 | Tspan32                                                                                                    | Csda                                     | Ets2                                                                                                      |
|                                                       | Cd9                                       | Cd24a                                                                                                   | Hiatl1                                 | Ttc14/Ccdc39                                                                                               | Ctla2a                                   | Evl                                                                                                       |
|                                                       | Cdk1                                      | Cd72/Tesk1                                                                                              | Hopx                                   |                                                                                                            | Ctla2b                                   | Fam101b                                                                                                   |
|                                                       | Chek1                                     | Cdc42se2/LOC100045021                                                                                   | Id2                                    |                                                                                                            | Ctla4                                    | Fam134b                                                                                                   |
|                                                       | Ch11                                      | Cirh1a                                                                                                  | Irfng                                  |                                                                                                            | Ctsd                                     | Fkbp3/Prp139                                                                                              |
|                                                       | Cit                                       | Clk2                                                                                                    | Il18r1                                 |                                                                                                            | Cxcr3                                    | Fos                                                                                                       |
|                                                       | Ckmt2                                     | Clk4                                                                                                    | Il18rap                                |                                                                                                            | Cyfp1                                    | Gadd45a                                                                                                   |
|                                                       | Cks2                                      | Cmah                                                                                                    | Igae                                   |                                                                                                            | Dennd5a                                  | Gart                                                                                                      |
|                                                       | Clic1                                     | Cnn3                                                                                                    | Igae                                   |                                                                                                            | Dnajc15                                  | Gas5                                                                                                      |
|                                                       | Coch                                      | Crlf3                                                                                                   | Junb                                   |                                                                                                            | Dock5                                    | Gm1005/Hnmpa                                                                                              |
|                                                       | Cox17                                     | Ctsl                                                                                                    | Kcnj8                                  |                                                                                                            | Dstn                                     | Gm10052/Hnmpa                                                                                             |
|                                                       | Cpa3                                      | Cxcs5                                                                                                   | Klf4                                   |                                                                                                            | E2f8                                     | Gm5643/Hnmpa1                                                                                             |
|                                                       | Cpsf2                                     | Cvtip                                                                                                   | Klrf1                                  |                                                                                                            | Ech1                                     | Gm5803/Hnmpa1                                                                                             |
|                                                       | Cpt2                                      | D10Wsu52e                                                                                               | Klrg1                                  |                                                                                                            | Ect2                                     | Gm7862                                                                                                    |
|                                                       | Crygb                                     | Ddx39b                                                                                                  | Klrf1                                  |                                                                                                            | Eil2                                     | Gn3                                                                                                       |
|                                                       | Cryl1                                     | Ddx5                                                                                                    | Lgals1                                 |                                                                                                            | Emp1                                     | H2-Aa                                                                                                     |
|                                                       | Cst7                                      | Dgka                                                                                                    | Lilrb4                                 |                                                                                                            | Eomes                                    | H2-Ea-ps                                                                                                  |
|                                                       | Ctla2a                                    | Dnajc7/Nkiras2                                                                                          | Ly6a                                   |                                                                                                            | Errfi1                                   | H2-Ob                                                                                                     |
|                                                       | Ctla2b                                    | Dntt                                                                                                    | Ly6c1/Ly6c2                            |                                                                                                            | Ezh2                                     | Hmgn1/LOC100044391                                                                                        |
|                                                       | Ctla4                                     | Dph5                                                                                                    | Ly6c1/Ly6c2                            |                                                                                                            | F2r                                      | Hnmpa1L2/Loc6                                                                                             |
|                                                       | Cxcl10                                    | Dscam1                                                                                                  | Mdfic                                  |                                                                                                            | Fas1                                     | Hnmpa1                                                                                                    |
|                                                       | Cxcr3                                     | Dtx1/Gm19706                                                                                            | Myo1f                                  |                                                                                                            | Fcgr2b                                   | Hspa9                                                                                                     |
|                                                       | Cyfp1                                     | Eef2                                                                                                    | Nrp1                                   |                                                                                                            | Fgl2                                     | Igf1bp4                                                                                                   |
|                                                       | Dock5                                     | Eif2s1                                                                                                  | Null                                   |                                                                                                            | Figl1                                    | Il4ra                                                                                                     |
|                                                       | Dock7                                     | Eif4a2                                                                                                  | Ode1                                   |                                                                                                            | Fyn                                      | Il6ra                                                                                                     |
|                                                       | E2f8                                      | Eif4g1                                                                                                  | Pglyrp1                                |                                                                                                            | Gapdh                                    | Il6st                                                                                                     |
|                                                       | Ect2                                      | Elov15                                                                                                  | Prr1                                   |                                                                                                            | Gapdh                                    | Il7r                                                                                                      |
|                                                       | Eea1                                      | Emb                                                                                                     | Prr13                                  |                                                                                                            | Gapdh                                    | Isoc1                                                                                                     |
|                                                       | Eil2                                      | Emi5                                                                                                    | Rn18s/Rn45s                            |                                                                                                            | Gapdh/Gm2606                             | Igae                                                                                                      |
|                                                       | Entpd1                                    | Eng                                                                                                     | Rnf138                                 |                                                                                                            | Glrx                                     | Itm2a                                                                                                     |
|                                                       | Eomes                                     | Emk1                                                                                                    | Runx2                                  |                                                                                                            | Gm10124                                  | Itp2                                                                                                      |
|                                                       | Etf1                                      | Ets1                                                                                                    | S100a4                                 |                                                                                                            | Gm10291                                  | Kctd12/Mir5130                                                                                            |
|                                                       | F2r                                       | Evl                                                                                                     | S100a6                                 |                                                                                                            | Gm10291                                  | Lef1                                                                                                      |
|                                                       | Fas1                                      | Fam101b                                                                                                 | St3gal6/Dcbl2                          |                                                                                                            | Gm11401                                  | Mdm4                                                                                                      |
|                                                       | Fgl2                                      | Fam102a                                                                                                 | Tnfrap3                                |                                                                                                            | Gm12070/Gapdh                            | Mettl8                                                                                                    |
|                                                       | Figl1                                     | Fam134b                                                                                                 | Txndc5                                 |                                                                                                            | Gm12070/Gapdh                            | Mettl9                                                                                                    |
|                                                       | Fyn                                       | Fkbp4                                                                                                   |                                        |                                                                                                            | Gm12070/Gm2606                           | Mhl1                                                                                                      |
|                                                       | Gapdh                                     | Fos                                                                                                     |                                        |                                                                                                            | Gm12070/Gm4609                           | Morf412                                                                                                   |
|                                                       | Gapdh                                     | Frat2                                                                                                   |                                        |                                                                                                            | Gm14148                                  | Ms4a1                                                                                                     |
|                                                       | Gapdh                                     | Gadd45a                                                                                                 |                                        |                                                                                                            | Gm14407                                  | Myb                                                                                                       |
|                                                       | Gapdh                                     | Glt25d1                                                                                                 |                                        |                                                                                                            | Gm2467                                   | Mye                                                                                                       |

|                                       |                      |  |  |                                       |                     |
|---------------------------------------|----------------------|--|--|---------------------------------------|---------------------|
| Gapdh/Gm12070                         | Gm10845              |  |  | Gm2606/Gm10291                        | Mycbp2              |
| Gas2                                  | Gm13777              |  |  | Gm3671                                | Nedd4l              |
| Gcdh                                  | Gm14165              |  |  | Gm3809                                | Nfkbiz              |
| Gdf3                                  | Gm14407              |  |  | Gm4804                                | Nrip1               |
| Gdpd5                                 | Gm2a                 |  |  | Gm4929                                | Nsg2                |
| Gem                                   | Gm4638/Gm4671        |  |  | Gm5068                                | Null                |
| Glrx                                  | Gm4671               |  |  | Gm5177                                | Nxf1                |
| Gm10291                               | Gm4761               |  |  | Gm5523/Gapdh/Gm12070                  | P2rx4               |
| Gm10291/Gm1029                        | Gm4833               |  |  | Gm6340                                | Parp8               |
| Gm12070/Gapdh                         | Gm4959               |  |  | Gm6946                                | Pdk1                |
| Gm12070/Gapdh                         | Gm5148               |  |  | Gm7123                                | Peli1               |
| Gm12070/Gapdh                         | Gm5191               |  |  | Gm7183                                | Phf12               |
| Gm14148                               | Gm6983               |  |  | Gm7286                                | Piga                |
| Gm2467                                | Gm7246               |  |  | Gm8055                                | Pkp4                |
| Gm2606/Gm10291                        | Gm7290               |  |  | Gm8174                                | Plekha1             |
| Gm3671                                | Gm7862               |  |  | Gm8513                                | Ppic                |
| Gm3809                                | Gm8231               |  |  | Gm8681                                | Prkd3               |
| Gm4804                                | Gm8624               |  |  | Gm9028                                | Rab3ip              |
| Gm4833                                | Gm9514               |  |  | Gm9034                                | Ramp1               |
| Gm4929                                | Gnas                 |  |  | Gm9081                                | Rere                |
| Gm5068                                | Gnb211               |  |  | Gm9238/Loc6776                        | Rgs10               |
| Gm5177                                | Gnl3                 |  |  | Gm9568                                | Satb1               |
| Gm5523/Gapdh/Gm12070                  | Gsn                  |  |  | Gp49a                                 | Scd1                |
| Gm6946                                | Gtf2i                |  |  | Gzma                                  | Sell                |
| Gm7123                                | H2-Ke6               |  |  | Gzmb                                  | Sema4b              |
| Gm7183                                | H2-Ob                |  |  | Gzmk                                  | Sfmbt2              |
| Gm7286                                | Hba-a1/Hba-a2        |  |  | H2-Q1                                 | Sfns7               |
| Gm8055                                | Hba-a1/Hba-a2        |  |  | H2-Q10                                | Slc12a7             |
| Gm8174                                | Hbb-b1/Hbb-b2/Beta-s |  |  | H2-Q2                                 | Smad1               |
| Gm8231                                | Hexa                 |  |  | H2-Q6/H2-Q8/LOC68395                  | Smad7               |
| Gm8513                                | Hmgcs1               |  |  | H2-Q6/H2-Q8/LOC68395                  | Smarca2             |
| Gm8681                                | Hmgn1/LOC100044391   |  |  | H2-Q7/H2-Q9/H2-Q8/H2-Q6/LOC68395      | Smc4                |
| Gm9028                                | Hmha1                |  |  | H2-T10/H2-T9                          | Snhg5               |
| Gm9034                                | Hnrnpu               |  |  | H2afz                                 | Soes3               |
| Gm9081                                | Hspa8                |  |  | Hba-a1/Hba-a2                         | Spred2              |
| Gm9568                                | Icam2                |  |  | Hba-a1/Hba-a2                         | Ssbp2               |
| Gp49a                                 | Idh2                 |  |  | Hbb-b1/Hbb-b2/Beta-s                  | St6gal1             |
| Gpd2                                  | Ifnar1               |  |  | Hiatl1                                | Tcf12               |
| Gpr56                                 | Igk-V28              |  |  | Hist3h2a/Trim17                       | Tcf7                |
| Gpr65                                 | Ikbke                |  |  | Hmgb2                                 | Tec                 |
| Gzma                                  | Il17ra               |  |  | Hopx                                  | Tgtp1/Tgtp2/Gm12185 |
| Gzmb                                  | Il4ra                |  |  | Id2                                   | Tlr6                |
| Gzmk                                  | Il6ra                |  |  | Ilfng                                 | Tnfaiip8            |
| Hiatl1                                | Il6st                |  |  | Il18r1                                | Tspan13             |
| Hist3h2a/Trim17                       | Il7r                 |  |  | Il18rap                               | Tsr1/Srr            |
| Hmgb2                                 | Ilvbl                |  |  | Il1rl1                                | Ttc3                |
| Id2                                   | Impdh2               |  |  | Irga4                                 | Vcam1               |
| Ih1                                   | Isoc1                |  |  | Irgax                                 | Wdr92               |
| Ihng                                  | Itgae                |  |  | Irgb1                                 | Xlr3b/Xlr3c/Xlr3a   |
| Irf4                                  | Irgb7                |  |  | Irgb2                                 | Xlr3b/Xlr3c/Xlr3a   |
| Irf8                                  | Kenn4                |  |  | Kif11                                 | Xlr3b/Xlr3c/Xlr3a   |
| Isg15                                 | Kctd10               |  |  | Klra3/LOC100862437/LOC100862410/Klra9 | Zbtb20              |
| Isg20                                 | Kdm3a                |  |  | Klra9/Klra3/Klra10                    | Zfp281              |
| Irga4                                 | Klf13                |  |  | Klrc1                                 | Zmym6/Gm12942       |
| Irgav                                 | Klf2                 |  |  | Klrg1                                 |                     |
| Irgb1                                 | Klf3                 |  |  | Klrk1                                 |                     |
| Irh5                                  | Klk8                 |  |  | Kpna2                                 |                     |
| Jak3/Ins13                            | Klrd1                |  |  | Lgals1                                |                     |
| Klf10                                 | Kpnb1                |  |  | Lgals3                                |                     |
| Klk1/Klk1b5/Klk1b4                    | Lbr                  |  |  | Lilrb4                                |                     |
| Klra3/LOC100862437/LOC100862410/Klra9 | Lck                  |  |  | Lonrf1                                |                     |
| Klra9/Klra3/Klra10                    | Lef1                 |  |  | Lxn                                   |                     |
| Klrg1                                 | Ltb                  |  |  | Ly6a                                  |                     |
| Kpna2                                 | Lyz2                 |  |  | Ly6c1/Ly6c2                           |                     |
| Lag3                                  | Macf1                |  |  | Ly6c1/Ly6c2                           |                     |
| Lat2                                  | Map4k4               |  |  | Mad211/LOC100045924                   |                     |
| Lclat1                                | Mapk8                |  |  | Mdfic                                 |                     |
| Lgals1                                | Mat2a                |  |  | Med121                                |                     |
| Lgals3                                | Mettl8               |  |  | Mki67                                 |                     |
| Lilrb4                                | Mettl9               |  |  | Myo1f                                 |                     |
| Litaf                                 | Mipol1/Prps113       |  |  | Ndufa6                                |                     |
| Lman2                                 | Ms4a1                |  |  | Nrp1                                  |                     |
| Lonrf1                                | Nedd4l               |  |  | Null                                  |                     |
| Ly6a                                  | Nfe212               |  |  | Nusap1/Oip5                           |                     |
| Mad211/LOC100045924                   | Nfkbiz               |  |  | Pbx3                                  |                     |
| Mdfic                                 | Npc2                 |  |  | Pfkb                                  |                     |
| Mki67                                 | Nsg2                 |  |  | Pglyrp1                               |                     |
| Mrp146                                | Nsun2                |  |  | Phf13                                 |                     |
| Mx1                                   | Null                 |  |  | Plscr1                                |                     |
| Myb4                                  | Numb                 |  |  | Polc3                                 |                     |
| Ndfip1                                | Nxf1                 |  |  | Prc1                                  |                     |
| Nfate1                                | Osbp111              |  |  | Prdm1                                 |                     |
| Nfil3                                 | Pak2                 |  |  | Prl1                                  |                     |
| Nped/Cbx6/Nptxr                       | Pdha1/Map3k15        |  |  | Prr13                                 |                     |
| Nr4a2                                 | Pdk1                 |  |  | Ptgr1                                 |                     |
| Nrp1                                  | Peli1                |  |  | Racgap1                               |                     |
| Nucb1                                 | Piga                 |  |  | Reep5                                 |                     |

|                |                                    |  |  |                                                                 |  |
|----------------|------------------------------------|--|--|-----------------------------------------------------------------|--|
| Null           | Pik3cd                             |  |  | Rhoq/Pigf                                                       |  |
| Nusap1/Oip5    | Pitpnc1                            |  |  | Rn18S ??=>?? 10445185<br>Rn18s/Rn45s OR<br>10536170 Rn18s/Rn45s |  |
| Pawr           | Plac8                              |  |  | Rora                                                            |  |
| Pbx3           | Pld3                               |  |  | Rpa2                                                            |  |
| Pdcd1          | Ppp2R5a                            |  |  | Rpl27a                                                          |  |
| Penk           | Ppp2R5a                            |  |  | Rpl27a                                                          |  |
| Perp           | Prdx6/LOC677654                    |  |  | Rpl27a                                                          |  |
| Pglyrp1        | Prkd2                              |  |  | Rpl38                                                           |  |
| Plin2          | Prkd3                              |  |  | Rrm2                                                            |  |
| Plk4           | Prps1                              |  |  | Runx2                                                           |  |
| Plscr1         | Prps111                            |  |  | S100a10                                                         |  |
| Pon2           | Ptpn6                              |  |  | S100a11                                                         |  |
| Pqlc3          | Ptprc                              |  |  | S100a13                                                         |  |
| Prc1           | Rabac1                             |  |  | S100a4                                                          |  |
| Prdm1          | Ramp1                              |  |  | S100a6                                                          |  |
| Ptger2         | Rap1gds1                           |  |  | Sec61g                                                          |  |
| Ptger4         | Rbm38                              |  |  | Serpinb9                                                        |  |
| Ptpn13         | Rere                               |  |  | Sh2d1a                                                          |  |
| Rbm39          | Rgs10                              |  |  | Sh3bgr1                                                         |  |
| Rcn1           | Rpl10                              |  |  | Slc4a7                                                          |  |
| Rgs16          | Rpl10a                             |  |  | Smc2                                                            |  |
| Rhoq/Pigf      | Rpl10l                             |  |  | Snx10                                                           |  |
| Rnfl1          | Rpl13                              |  |  | St3gal6/Dcblid2                                                 |  |
| Romo1          | Rpl22/LOC100504863                 |  |  | Stard10                                                         |  |
| Rpa2           | Rpl27a                             |  |  | Stmn1                                                           |  |
| Rpl38          | Rpl27a                             |  |  | Tacc3                                                           |  |
| Rps4X          | Rpl27a                             |  |  | Tceb2                                                           |  |
| Rps4x          | Rpl28                              |  |  | Tmem49/Mir21                                                    |  |
| Rrm2           | Rpl28                              |  |  | Top2a                                                           |  |
| Rsad2          | Rpl3                               |  |  | Trappc1                                                         |  |
| Runx2          | Rpl8                               |  |  | Txn1                                                            |  |
| S100a11        | Rplp0                              |  |  | Txndc5                                                          |  |
| S100a13        | Rplp1                              |  |  |                                                                 |  |
| S100a4         | Rps16/Gm10079                      |  |  |                                                                 |  |
| S100a6         | Rps23                              |  |  |                                                                 |  |
| Scin           | Rps23/Gm5148/Gm8618                |  |  |                                                                 |  |
| Sec61g         | Rps28                              |  |  |                                                                 |  |
| Sept4          | Rps3                               |  |  |                                                                 |  |
| Serpinb6a      | Rps3a                              |  |  |                                                                 |  |
| Serpinb9       | Rps3a                              |  |  |                                                                 |  |
| Sh2d2a         | Rps4x                              |  |  |                                                                 |  |
| Sh3bgr1        | Rps4x                              |  |  |                                                                 |  |
| Shkbp1         | Rps7                               |  |  |                                                                 |  |
| Slc29a1        | Rps8                               |  |  |                                                                 |  |
| Slc4a7         | Rps8                               |  |  |                                                                 |  |
| Smc2           | Rps8                               |  |  |                                                                 |  |
| Snrpb2         | S1pr4                              |  |  |                                                                 |  |
| Snx10          | Satb1                              |  |  |                                                                 |  |
| Spock2         | Scd1                               |  |  |                                                                 |  |
| Spp1           | Sdha                               |  |  |                                                                 |  |
| Stmn1          | Sell                               |  |  |                                                                 |  |
| Svpl           | Sema4a                             |  |  |                                                                 |  |
| Tacc3          | Simbt2                             |  |  |                                                                 |  |
| Tank           | Sfpq                               |  |  |                                                                 |  |
| Tbc1d22a       | Sgk1                               |  |  |                                                                 |  |
| Tcea2          | Shah1a                             |  |  |                                                                 |  |
| Terg-V3/Terg-V | Skp1a                              |  |  |                                                                 |  |
| Tcta           | Slc12a7                            |  |  |                                                                 |  |
| Tctn3          | Slco3a1                            |  |  |                                                                 |  |
| Tfdp1          | Smad1                              |  |  |                                                                 |  |
| Tmem109        | Smarca2                            |  |  |                                                                 |  |
| Tnfrsf1a       | Snord15b/Rps3                      |  |  |                                                                 |  |
| Tnfrsf1b       | Snord38a/LOC100862183/Gm15501/Rps8 |  |  |                                                                 |  |
| Tnfrsf9        | Snrpd3                             |  |  |                                                                 |  |
| Top2a          | Snx4                               |  |  |                                                                 |  |
| Tor3a          | Spnb2                              |  |  |                                                                 |  |
| Trim25         | Srpk1                              |  |  |                                                                 |  |
| Trim47         | Ss18                               |  |  |                                                                 |  |
| Ttc39b         | Ssbp2                              |  |  |                                                                 |  |
| Tubb2a         | St6gal1                            |  |  |                                                                 |  |
| Txn1           | Stk38                              |  |  |                                                                 |  |
| Ube2t          | Supt4h1/Gm3258                     |  |  |                                                                 |  |
| Vamp7          | Supt4h1/Gm3258                     |  |  |                                                                 |  |
| Vamp8          | Supt5h                             |  |  |                                                                 |  |
| Vmp1           | Tcf7                               |  |  |                                                                 |  |
| Vps37a/Mtmr7   | Tec                                |  |  |                                                                 |  |
| Wbp5           | Tgtp1/Tgtp2/Gm12185                |  |  |                                                                 |  |
| Wnk1           | Tlr6                               |  |  |                                                                 |  |
| Zfp91-Cntf/Zfp | Tmc6                               |  |  |                                                                 |  |
|                | Tmed2                              |  |  |                                                                 |  |
|                | Tmem50b                            |  |  |                                                                 |  |
|                | Tmem66                             |  |  |                                                                 |  |
|                | Trim28                             |  |  |                                                                 |  |
|                | Tsr1/Srr                           |  |  |                                                                 |  |
|                | Ttc3                               |  |  |                                                                 |  |
|                | Tubb5                              |  |  |                                                                 |  |
|                | Twf2                               |  |  |                                                                 |  |

|  |                   |  |  |  |  |
|--|-------------------|--|--|--|--|
|  | Ubp1/Fbx12        |  |  |  |  |
|  | Use1              |  |  |  |  |
|  | Wdr92             |  |  |  |  |
|  | Xlr3b/Xlr3c/Xlr3a |  |  |  |  |
|  | Xlr3b/Xlr3c/Xlr3a |  |  |  |  |
|  | Xlr3b/Xlr3c/Xlr3a |  |  |  |  |
|  | Zfp36             |  |  |  |  |
|  | Znr2              |  |  |  |  |

| T cell program of interest                            | Self tolerant (overexpressed)                                                                                                                                                                                                                                                                                                                                                                                                                                                                                                                                                                                                                                   | Self tolerant (underexpressed)                                                                                                                                                                                                                                                                                                                                                                                                                                                                                                                                                                                                                                 | Deletional tolerance (overexpressed)                                                                                                                                                                                                                                                                                                                                                                                            | Deletional tolerance (underexpressed)                                                                                                                                                               | Anergy (overexpressed)                                                                                                               | Anergy (underexpressed)                     |
|-------------------------------------------------------|-----------------------------------------------------------------------------------------------------------------------------------------------------------------------------------------------------------------------------------------------------------------------------------------------------------------------------------------------------------------------------------------------------------------------------------------------------------------------------------------------------------------------------------------------------------------------------------------------------------------------------------------------------------------|----------------------------------------------------------------------------------------------------------------------------------------------------------------------------------------------------------------------------------------------------------------------------------------------------------------------------------------------------------------------------------------------------------------------------------------------------------------------------------------------------------------------------------------------------------------------------------------------------------------------------------------------------------------|---------------------------------------------------------------------------------------------------------------------------------------------------------------------------------------------------------------------------------------------------------------------------------------------------------------------------------------------------------------------------------------------------------------------------------|-----------------------------------------------------------------------------------------------------------------------------------------------------------------------------------------------------|--------------------------------------------------------------------------------------------------------------------------------------|---------------------------------------------|
| T cell programs compared for relative gene expression | Tolerant self-specific CD8+ T cells (K means clusters 9 and 13) vs.                                                                                                                                                                                                                                                                                                                                                                                                                                                                                                                                                                                             | Functionally rescued tolerant and memory self-specific CD8+ T cells (K means clusters 7, 8, 10, 11 and 14) vs.                                                                                                                                                                                                                                                                                                                                                                                                                                                                                                                                                 | CD8+ T cells undergoing deletional tolerance vs.                                                                                                                                                                                                                                                                                                                                                                                | CD8+ T cells during immunity and lymphopenia-induced proliferation vs.                                                                                                                              | Various anergic T cells vs.                                                                                                          | Various anergic T cells vs.                 |
|                                                       | Naïve and memory self-specific CD8+ T cells                                                                                                                                                                                                                                                                                                                                                                                                                                                                                                                                                                                                                     | Tolerant self-specific CD8+ T cells                                                                                                                                                                                                                                                                                                                                                                                                                                                                                                                                                                                                                            | CD8+ T cells during immunity and lymphopenia-induced proliferation                                                                                                                                                                                                                                                                                                                                                              | CD8+ T cells undergoing deletional tolerance                                                                                                                                                        | Various T cell programs                                                                                                              | Various T cell programs                     |
| Reference                                             | Schietinger A et al. 2012                                                                                                                                                                                                                                                                                                                                                                                                                                                                                                                                                                                                                                       | Schietinger A et al. 2012                                                                                                                                                                                                                                                                                                                                                                                                                                                                                                                                                                                                                                      | Parish IA et al. 2009                                                                                                                                                                                                                                                                                                                                                                                                           | Parish IA et al. 2009                                                                                                                                                                               | Parish IA et al. 2009; Redmond WL et al. 2005; Davey GM et al. 2002; Schwartz RH, 2003; Rocha B et al. 1995; Hernandez J et al. 2001 | Parish IA et al. 2009; Davey GM et al. 2002 |
| Gene set                                              | Cd81<br>Clspn<br>Cdc20<br>Kif15<br>Tefl9<br>LOC237877<br>Lag3<br>Tnfrsf9<br>Aurka<br>Beat1<br>Tfr<br>Iccnp<br>Mcm10<br>Hmgn3<br>Snn/Txndc11<br>Esp1<br>Hist1h3e<br>Chf18<br>Hist1h2bn<br>Kntc1<br>Gtse1<br>Sgol1<br>Ecm1<br>Kif18b<br>Hist1h3a<br>Kif2c<br>Cdea2<br>Fancd2<br>Detpp1<br>Cdc6<br>Chaf1a/Ubxn6<br>Chst2<br>Spag5<br>Hist1h2bm<br>Cldn10<br>Igf2bp3<br>Nhede2<br>Apitd1<br>Ccdc99<br>Lig1<br>Stmn1<br>Zranb3<br>Cdc45<br>Mareks11<br>Rgs16<br>Ptpla<br>Chst3<br>Cenpm<br>Ptprs<br>Ncapd2<br>Nrgn<br>Hist1h3c<br>Sox5<br>Hist1h3d<br>Sxb<br>Nrn1<br>Hist1h2bh<br>Rcc1<br>Bub1b<br>Hist1h2bj<br>Hist1h2ab<br>Tpi1<br>Mcm5<br>Nmra1<br>Rad51<br>Cdea7 | 1700025G04Rik<br>4930486L24Rik<br>Abcb9<br>Abhd14b<br>Acpl2<br>Acsbg1<br>Acy1<br>Adssl1<br>Ahnka<br>Aim1<br>Alad<br>Alox5ap<br>Amica1<br>Ank<br>Anxa3<br>Ap1g2/Thtpa<br>Apobr/Cln3<br>Aqp1<br>Aqp9<br>Arl4d<br>Arzb<br>Asb2<br>Ass1/Gm5424<br>Axl<br>Bag3<br>Bbc3<br>Bbs9<br>BC021614<br>Bel2<br>Bhlhe40<br>Blvrb<br>Clqb<br>Clqc<br>Clqtnf4<br>C3<br>Camk2n1<br>Camp<br>Car11<br>Casp1<br>Casp4<br>Ccl4<br>Ccl5<br>Ccl9<br>Cer5/Ccr2<br>Cd163i1<br>Cd177<br>Cd22<br>Cd44<br>Cd63<br>Cd7<br>Cd74<br>Cdc42ep3<br>Cdh1<br>Cdk5rap1<br>Cdkn2c<br>Cebpb/Tmem189<br>Cebpe<br>Chi311<br>Chi313<br>Chi317<br>Cobll1<br>Csprs/Gm7609<br>Ctsa<br>Ctsw<br>Cxcr3<br>Cxcr5 | 4921525O09Rik<br>4930539E08Rik<br>A830073O21Rik<br>Cd20041<br>Crem<br>Cyth3<br>Dgkz<br>Egr2<br>Egr2<br>Endod1<br>Ephx1<br>Fcerl1<br>Galm<br>Gpm6b<br>H3f3b/Gm12657/Gm6749/H3f3c/H3f3a<br>Hspa41<br>Ikzf2<br>Lpcat1<br>Lrig1<br>Lta<br>Marcks<br>Mdh1<br>Nab2<br>Nr4a1<br>Nr4a3<br>Nrip1<br>Nrn1<br>Pacsin1<br>Prmt2<br>Ptprs<br>Rasa1<br>Reep3<br>Rgs16<br>Skil<br>Soat1<br>Ssh1<br>Synj2<br>Tbc1d4<br>Tnfrsf11<br>Tox<br>Ypel2 | 6330409N04Rik<br>Axin2<br>Dtx1/Gm19706<br>Fech<br>Gimap7<br>Gzma<br>H2-Aa<br>Hbb-bh1<br>Il18rap<br>Klf3<br>Ly6a<br>Ly6c1/Ly6c2<br>Lyz1<br>Lyz2<br>Nedd4<br>Psmb2<br>Rras2<br>Sike1<br>Snca<br>Sytl1 | Cblb<br>Cd5<br>Cdkn1b<br>Ctla4<br>Dgka<br>Dgkz<br>Egr2<br>Egr3<br>Itch<br>Nfatc2<br>Pag1<br>Pdcd1<br>Rnf128                          | Tob1                                        |

|                     |                    |  |  |  |  |
|---------------------|--------------------|--|--|--|--|
| Spe25               | Cxcr6              |  |  |  |  |
| Ndrp1               | Cyb5r4             |  |  |  |  |
| Pdzd11/Kif4         | D14Ertnd668e       |  |  |  |  |
| Rilp12              | D8Ertnd82e         |  |  |  |  |
| Pif1                | Dapk2              |  |  |  |  |
| Cenpa               | Dennd3             |  |  |  |  |
| Rad54l              | Dkk1l              |  |  |  |  |
| Hist1h3h            | Dmrta1             |  |  |  |  |
| Cenpn               | Dstn               |  |  |  |  |
| Hist1h2bk           | Ear2               |  |  |  |  |
| Hist1h2bf           | Elane              |  |  |  |  |
| Rad54b/Fsdp         | Emilin2            |  |  |  |  |
| Cdc7                | Emr1               |  |  |  |  |
| Itm2a               | Eomes              |  |  |  |  |
| Fibcd1              | Epb4.113           |  |  |  |  |
| Xcl1                | Epsti1             |  |  |  |  |
| Sh3bp2              | Eraf               |  |  |  |  |
| Top2a               | Errfi1             |  |  |  |  |
| Hist1h2af           | F2r                |  |  |  |  |
| Ppic                | F2r1               |  |  |  |  |
| Hist1h2an           | Fam26f             |  |  |  |  |
| Cdk1                | Fcgr4              |  |  |  |  |
| Birc5               | Fcgrt              |  |  |  |  |
| Hist1H2ag           | Fcna               |  |  |  |  |
| Hist2ab             | Fgfl3              |  |  |  |  |
| Litaf               | Fndc3b             |  |  |  |  |
| E2f2                | Fpr3/Fpr2          |  |  |  |  |
| Pre1                | Gab3               |  |  |  |  |
| Cdca3               | Gas7               |  |  |  |  |
| H2afx               | Gata3              |  |  |  |  |
| Hist1h2ah           | Gatsl3             |  |  |  |  |
| Nusap1/Oip5         | Gbp3               |  |  |  |  |
| Ppa1                | Gimap7             |  |  |  |  |
| Tyms/Tyms-ps        | Glrx               |  |  |  |  |
| LOC100047934        | Gm12253            |  |  |  |  |
| Ccnb1/Gm5593        | Gm4814/Cmya5       |  |  |  |  |
| Psat1/LOC100047252  | Gng2               |  |  |  |  |
| Pbk                 | Gpc1               |  |  |  |  |
| Hist1h2ak           | Gpr183             |  |  |  |  |
| Mcm6                | Gramd3             |  |  |  |  |
| Hist1h2ad           | Gsto1              |  |  |  |  |
| Tyms-ps             | Gtde2              |  |  |  |  |
| Uhrf1               | Gvin1/Gm4070       |  |  |  |  |
| Krlb1c              | Gznm               |  |  |  |  |
| Adk                 | H2-Ab1             |  |  |  |  |
| Rml1                | H2-DMb2/H2-DMb1    |  |  |  |  |
| Hist1h2ao           | H2-Eb1             |  |  |  |  |
| Tnfrst2l            | Hcst               |  |  |  |  |
| 2810417H13Rik       | Hdc                |  |  |  |  |
| Scamp1              | Hebp1              |  |  |  |  |
| Chn2/9130019P16Rik  | Hk3                |  |  |  |  |
| Lmnb1               | Hmox1              |  |  |  |  |
| Anln                | Hp                 |  |  |  |  |
| Rrm2                | Hsd11b1            |  |  |  |  |
| Pkm                 | Ier3               |  |  |  |  |
| Kif22               | Ifi30              |  |  |  |  |
| Prm2/Wdr19          | Ifit3              |  |  |  |  |
| Plk1                | Ifitm2             |  |  |  |  |
| Mad211/LOC100045924 | Ifitm3             |  |  |  |  |
| LOC100045304        | Ifitm6             |  |  |  |  |
| Ncaph               | Ifng               |  |  |  |  |
| E2f1                | Ifngr1             |  |  |  |  |
| Hist2H2ac           | Il10ra             |  |  |  |  |
| Tk1                 | Il12rb1            |  |  |  |  |
| Fen1                | Il18r1             |  |  |  |  |
| Fign1               | Il18rap            |  |  |  |  |
| D17H6S56E-5         | Il1b               |  |  |  |  |
| Ndrp1               | Il7r               |  |  |  |  |
| Mcm2                | Inpp1              |  |  |  |  |
| Kif11               | Insl6              |  |  |  |  |
| Cdca5               | Itgad              |  |  |  |  |
| Chaf1b              | Irgb1              |  |  |  |  |
| Capg                | Kcnj8              |  |  |  |  |
| Endod1              | Kcnk6              |  |  |  |  |
| Cenph               | Klra16             |  |  |  |  |
| Galk1/Itgb4         | Klra7              |  |  |  |  |
| Swap70              | Klra9/Klra3/Klra10 |  |  |  |  |
| LOC100047651        | Klire1             |  |  |  |  |
| Geod1               | Klrk1              |  |  |  |  |
|                     | Lat2               |  |  |  |  |
|                     | Lcn2               |  |  |  |  |
|                     | Lgals3bp           |  |  |  |  |
|                     | Lmna               |  |  |  |  |
|                     | Loc100046232       |  |  |  |  |
|                     | Loc100046608       |  |  |  |  |
|                     | Loc100047167       |  |  |  |  |
|                     | Loc100048346       |  |  |  |  |
|                     | Loc641240          |  |  |  |  |
|                     | Lpxn               |  |  |  |  |

|                     |  |  |  |  |
|---------------------|--|--|--|--|
| Lrg1                |  |  |  |  |
| Lrrk1               |  |  |  |  |
| Ltb4r1              |  |  |  |  |
| Lif                 |  |  |  |  |
| Ly6a                |  |  |  |  |
| Ly6c1/Ly6c2         |  |  |  |  |
| Ly6e                |  |  |  |  |
| Lyz1                |  |  |  |  |
| Lyz2                |  |  |  |  |
| Lyz2                |  |  |  |  |
| Mapre2              |  |  |  |  |
| Mdfic               |  |  |  |  |
| Med7                |  |  |  |  |
| Mfsd10              |  |  |  |  |
| Mgst1               |  |  |  |  |
| Milkl               |  |  |  |  |
| Mmp9                |  |  |  |  |
| Mocos               |  |  |  |  |
| Mpo                 |  |  |  |  |
| Mrc1                |  |  |  |  |
| Mrpl52              |  |  |  |  |
| Ms4a6d              |  |  |  |  |
| Mtl                 |  |  |  |  |
| Myadm               |  |  |  |  |
| Myl4                |  |  |  |  |
| Myo1f               |  |  |  |  |
| Myo6                |  |  |  |  |
| Naip2               |  |  |  |  |
| Nans                |  |  |  |  |
| Nccrp1              |  |  |  |  |
| Ncf4                |  |  |  |  |
| Ngp                 |  |  |  |  |
| Nkg7                |  |  |  |  |
| Nod1                |  |  |  |  |
| Nrarp               |  |  |  |  |
| Nt5e                |  |  |  |  |
| Nuak2               |  |  |  |  |
| Nudt4               |  |  |  |  |
| Oas1g/Oas1a         |  |  |  |  |
| Osbp13              |  |  |  |  |
| P2ry14              |  |  |  |  |
| Pde2a               |  |  |  |  |
| Ptkp                |  |  |  |  |
| Phf11               |  |  |  |  |
| Pkig/Gm6334         |  |  |  |  |
| Plac8               |  |  |  |  |
| Plcg2               |  |  |  |  |
| Plek/Chrip1         |  |  |  |  |
| Plekhg3             |  |  |  |  |
| Plscr1              |  |  |  |  |
| Pou6f1              |  |  |  |  |
| Pqle3               |  |  |  |  |
| Prfl                |  |  |  |  |
| Prtn3               |  |  |  |  |
| Ptpn12              |  |  |  |  |
| Pygl                |  |  |  |  |
| Rab19               |  |  |  |  |
| Rab31               |  |  |  |  |
| Rap1gap2            |  |  |  |  |
| Rassf4              |  |  |  |  |
| Reck                |  |  |  |  |
| Retnlg              |  |  |  |  |
| Rgs1                |  |  |  |  |
| Rnf138              |  |  |  |  |
| Ryk                 |  |  |  |  |
| S100a6              |  |  |  |  |
| S100a8              |  |  |  |  |
| S100a9              |  |  |  |  |
| Samd3               |  |  |  |  |
| Scly                |  |  |  |  |
| Sen2b               |  |  |  |  |
| Sdc3                |  |  |  |  |
| Sdcbp2              |  |  |  |  |
| Sepr1               |  |  |  |  |
| Serpina3f/Serpina3g |  |  |  |  |
| Serpina3f/Serpina3g |  |  |  |  |
| Serpina6b           |  |  |  |  |
| Sidtl               |  |  |  |  |
| Sla                 |  |  |  |  |
| Slamf7              |  |  |  |  |
| Slc11a1             |  |  |  |  |
| Slc38a5             |  |  |  |  |
| Slc39a4             |  |  |  |  |
| Slc40a1             |  |  |  |  |
| Slc4a1              |  |  |  |  |
| Slc52a3             |  |  |  |  |
| Slpi                |  |  |  |  |
| Smad3               |  |  |  |  |
| Sntb2               |  |  |  |  |

|  |                  |  |  |  |
|--|------------------|--|--|--|
|  | Snx10            |  |  |  |
|  | Snx8             |  |  |  |
|  | Soat2            |  |  |  |
|  | Sort1            |  |  |  |
|  | Sort1            |  |  |  |
|  | Spin2            |  |  |  |
|  | St3gal6/Deblid2  |  |  |  |
|  | St6galnac4       |  |  |  |
|  | Stard10          |  |  |  |
|  | Stat4            |  |  |  |
|  | Susd3            |  |  |  |
|  | Swap70           |  |  |  |
|  | Svt2             |  |  |  |
|  | Tbx21            |  |  |  |
|  | Tdrd7            |  |  |  |
|  | Tgfb1            |  |  |  |
|  | Tgm2             |  |  |  |
|  | Tm6sf1/Hdgfrp3   |  |  |  |
|  | Tmem51           |  |  |  |
|  | Trem3            |  |  |  |
|  | Trf/Sprb         |  |  |  |
|  | Tshz3            |  |  |  |
|  | Ttc39b           |  |  |  |
|  | Txndc5           |  |  |  |
|  | Tyrobp           |  |  |  |
|  | Uap111           |  |  |  |
|  | Ublep1           |  |  |  |
|  | Unc93b1          |  |  |  |
|  | Usp18            |  |  |  |
|  | Vcam1            |  |  |  |
|  | Vim/LOC100862060 |  |  |  |
|  | Vkore1           |  |  |  |
|  | Wdr95            |  |  |  |
|  | X99384           |  |  |  |
|  | Zc3h6            |  |  |  |
|  | Zcchc18          |  |  |  |
|  | Zfhx2/Zfhx2as    |  |  |  |
|  | Zfp296           |  |  |  |
|  | Zfp3             |  |  |  |
|  | Zscan12          |  |  |  |

| T cell program of interest                            | Patient TILN (overexpressed)                   | Patient TILN (underexpressed)                      | All CD8+ TIL (overexpressed)                                                                                            | All CD8+ TIL (underexpressed)                                                         |
|-------------------------------------------------------|------------------------------------------------|----------------------------------------------------|-------------------------------------------------------------------------------------------------------------------------|---------------------------------------------------------------------------------------|
| T cell programs compared for relative gene expression | Tumor-specific CD8+ T cells from a tumor vs.   | Tumor-specific CD8+ T cells from the periphery vs. | 200 most differentially expressed genes of all CD8+ TIL (regardless of specificity), from a mouse model of melanoma vs. | 200 most differentially expressed genes of all naive CD8+ T cells from the spleen vs. |
|                                                       | Tumor-specific CD8+ T cells from the periphery | Tumor-specific CD8+ T cells from a tumor           | Naive CD8+ T cells from the spleen                                                                                      | All CD8+ TIL (regardless of specificity), from a mouse model of melanoma              |
| Reference                                             | Baitsch L et al. 2010                          | Baitsch L et al. 2010                              | Giordano M et al. 2015                                                                                                  | Giordano M et al. 2015                                                                |
| Gene set                                              | 4931431C16Rik/Acox3                            | Abhd14b                                            | Acsbg1                                                                                                                  | Abcc5                                                                                 |
|                                                       | Ak2                                            | Anapc5                                             | Actg1                                                                                                                   | Abcg3                                                                                 |
|                                                       | Algl10b                                        | Atg16l1                                            | Ahnak                                                                                                                   | Acot2                                                                                 |
|                                                       | Angptl6/A230050P20Rik                          | Atg3                                               | Ap2m1                                                                                                                   | Adar                                                                                  |
|                                                       | Apeh                                           | Atp2b1                                             | Atp2b4                                                                                                                  | Akr1b3/Gm6644                                                                         |
|                                                       | Atf3                                           | BC005561                                           | Batf                                                                                                                    | Ank                                                                                   |
|                                                       | Atf4                                           | Blmh                                               | Bcl2a1c                                                                                                                 | Ap1ar                                                                                 |
|                                                       | Becn1/Cntd1                                    | Cacybp                                             | Bcl2a1d                                                                                                                 | Arhgef18                                                                              |
|                                                       | Bst2                                           | Casp8                                              | Bcl2l1                                                                                                                  | Arid3b                                                                                |
|                                                       | Calm4                                          | Cd300e                                             | Calm2/Calm3/Calm1                                                                                                       | Arpc1b/Gm5637                                                                         |
|                                                       | Cblb                                           | Clpx                                               | Calu                                                                                                                    | Atp6ap2                                                                               |
|                                                       | Cct6a                                          | Cog4                                               | Camk2n1                                                                                                                 | Atp6v0a1                                                                              |
|                                                       | Cd27                                           | Comm2                                              | Caml                                                                                                                    | Bace1                                                                                 |
|                                                       | Cklf                                           | Cox6b1                                             | Casp1                                                                                                                   | Bbs9                                                                                  |
|                                                       | Cltb                                           | Cul4a                                              | Casp8                                                                                                                   | Bcl9                                                                                  |
|                                                       | Cotl1                                          | Derl2/LOC100862452                                 | Ccdc72                                                                                                                  | Brix1                                                                                 |
|                                                       | Cpt1c                                          | E2f1                                               | Ccl25                                                                                                                   | Carhsp1                                                                               |
|                                                       | Crtam                                          | Eif4g3                                             | Ccl3                                                                                                                    | Ccdc101                                                                               |
|                                                       | Csnk2a2                                        | Fbxo3                                              | Ccl4                                                                                                                    | Ccdc114                                                                               |
|                                                       | Ctla4                                          | Flna                                               | Ccl5                                                                                                                    | Ccdc30                                                                                |
|                                                       | Cxcl13                                         | Fxyd5                                              | Cer5/Cer2                                                                                                               | Ccdc64                                                                                |
|                                                       | Dclre1c                                        | Fzr1                                               | Cct5                                                                                                                    | Cd2ap                                                                                 |
|                                                       | Ddx11                                          | G3bp1                                              | Cdt1                                                                                                                    | Cept1/Dennd2d/Dram2                                                                   |
|                                                       | Dgke                                           | Gins4                                              | Cerk1                                                                                                                   | Chmp2a                                                                                |
|                                                       | Dtnbp1                                         | Gk5                                                | Crem                                                                                                                    | Chrn1                                                                                 |
|                                                       | Dusp16                                         | Golga4                                             | Csnk2a1                                                                                                                 | Cmah                                                                                  |
|                                                       | Dusp4                                          | Inpp5d                                             | Ctla2a                                                                                                                  | Col10a1                                                                               |
|                                                       | Dusp5                                          | Itgam                                              | Ctla2b                                                                                                                  | Cpeb4                                                                                 |
|                                                       | Erb2ip                                         | Jhdm1d                                             | Ctss                                                                                                                    | Cyth1                                                                                 |
|                                                       | Erf                                            | Kcmn1                                              | Cul2                                                                                                                    | Dap11                                                                                 |
|                                                       | Exoc4                                          | Lrrc47/1190007F08Rik                               | Cxcl10                                                                                                                  | Ddx23                                                                                 |
|                                                       | Exoc5/Mudeng                                   | Lyar                                               | Cyp51                                                                                                                   | Ddx39                                                                                 |
|                                                       | Exoc7                                          | Metap1                                             | Cysl2r2                                                                                                                 | Dlg1                                                                                  |
|                                                       | Fam105b                                        | Mif4gd                                             | Dcaf5                                                                                                                   | Dph5                                                                                  |
|                                                       | Fam53c                                         | Myo1f                                              | Ddx3x                                                                                                                   | Drg1                                                                                  |
|                                                       | Fos                                            | Ndufs8                                             | Ddx54                                                                                                                   | Dtnb                                                                                  |
|                                                       | Galm                                           | Nf2                                                | Dennd4a                                                                                                                 | Ears2                                                                                 |
|                                                       | Gapvd1                                         | Nr3c1                                              | Dhx58                                                                                                                   | Eif3j/Gm9781                                                                          |



|                            |                        |                     |                     |
|----------------------------|------------------------|---------------------|---------------------|
| Gbp1/Gbp5/LOC100047734     | Pdcd2                  | Dnajb1              | Entpd4/LOC100862375 |
| Gcc2                       | Pik3r1                 | Dusp1               | Eya2                |
| Gem                        | Pno1                   | Ecd                 | Fam53b              |
| Gm10784                    | Polr1d                 | Eif5a13-ps          | Fam65b              |
| Gm5472                     | Pom121/Nsun5           | Emgl/L.peat3        | Fkbp15              |
| Gm6560                     | Ppp2r5c                | Eml5                | Fntb/LOC639541      |
| Gpr19                      | Ppp3r1/Wdr92           | Eomes               | Foxk1               |
| Gramd1b                    | Ppp4r1                 | Ergic2/Far2         | Foxk1               |
| Hdgf                       | Psma2                  | F2r                 | Fry                 |
| Hdhd2                      | Pxn                    | Fam46c              | Ggnbp1/Zbtb9        |
| Hlip1                      | Rbl2                   | Fam96a              | Ggt1                |
| Hspd1                      | Rev3l                  | Fbxo40              | Gmps                |
| Icos                       | Rpl18a                 | Fcer1g              | Gon4l               |
| Ier3ip1/Hdhd2              | Rpl18a                 | Frrs1               | H3f3a               |
| Ifng                       | Samhd1                 | Fyn                 | Haus7/LOC100048005  |
| Il2/Snapin                 | Scaf1l                 | Gabarap             | Hs6st1              |
| Irf4                       | Sh3bgrl3               | Gatad2a             | Hspa14/LOC100861945 |
| Irga1                      | Ssbp3                  | Gch1                | Igf1r               |
| Irm2a                      | Ssbp4                  | Glccl1              | Igfbp4              |
| Jmjdlc                     | Thoc2                  | Gng2                | Ikbke               |
| Jtb                        | Tmub2                  | Golph3              | Il6st               |
| Kif3b                      | Tnfrsf25               | Gp49a               | Ino80               |
| Lasp1                      | Tpst2                  | Gramd1b             | Irgm2/Igtp          |
| Lix1l                      | Traf3ip3/A130010115Rik | Gramd4              | Isg2012             |
| LOC545845                  | Txnip                  | Grina               | Kcnmb1              |
| Mapre2                     | Ube2b                  | Gzmb                | Kif9                |
| Mbn1l                      | Uqcrq                  | H2-Ab1              | Klhl22              |
| Mcl1                       | Vdac2                  | H2-Ea-ps            | Krtap5-4            |
| Mcm6                       | Zbtb44                 | H2afy               | Larp1b              |
| Myo7a                      | Zyx/Epha1              | H2afz               | Las1l               |
| Ndfip1                     |                        | Hba-a1/Hba-a2       | Limd2/LOC632329     |
| Ndufc2/LOC675851/LOC635087 |                        | Hip1                | Lin52               |
| Neil2                      |                        | Hmbox1              | Lrre51              |
| Nfat5                      |                        | Hmgb2               | Map2k5              |
| Nod2                       |                        | Hsp90aa1            | Map3k7              |
| Nploc4                     |                        | Hspa1a              | Map4k2              |
| Otud7b                     |                        | Hsph1               | Mbp                 |
| Parvb                      |                        | Icam1               | Mdn1                |
| Parvg                      |                        | Idh3a               | Med20               |
| Pcbp2/Map3k12              |                        | Ier3                | Mettl3/Tox4         |
| Pes1                       |                        | Ifi35               | Mfsd4               |
| Phlda1                     |                        | Ifit3               | Miip                |
| Pik3ip1                    |                        | Igf2r               | Mpdu1               |
| Pik3r1                     |                        | Il18bp              | Msh3                |
| Pkm                        |                        | Il2rb               | Mtch2               |
| Polr1d                     |                        | Irgm1               | Mthfd1              |
| Pom121/Nsun5               |                        | itgb1               | Mthfd11             |
| Ppp1cc                     |                        | Iws1                | Myc                 |
| Ppp1r2                     |                        | Kif10               | Myliip              |
| Ppp1r2/Ppp1r2-ps3          |                        | Klra23              | N6amt1              |
| Ppp1r2/Ppp1r2-ps3          |                        | Klrc1               | Nadk                |
| Prdx5/Trmt112              |                        | Krr1/Glipr1         | Nap114              |
| Psenen                     |                        | Lag3                | Npas2               |
| Ptprj                      |                        | Lass2               | Nsg2                |
| Rab27a                     |                        | Lilrb4              | Nsun2               |
| Rala                       |                        | L.peat1             | Nuch2               |
| Ranbp2                     |                        | Lphn1               | Nup188              |
| Rdh10                      |                        | Lsm3                | Osbp17              |
| Rgs1                       |                        | Lsm6                | Pak1ip1             |
| Rgs3                       |                        | Lsr                 | Parp1               |
| Rnf24                      |                        | Ly6c1/Ly6c2         | Pcsk1               |
| Sardh                      |                        | Lzic                | Pdcd11              |
| Sat1                       |                        | Mad211/LOC100045924 | Pdzk1/Gpr89         |
| Sema7a                     |                        | Maf                 | Pecam1              |
| Slc7a5                     |                        | Map2k3              | Pias1               |
| Snx9                       |                        | Med29               | Pik3ip1             |
| Sod1                       |                        | Mex3c               | Pip4k2a             |
| Spg7                       |                        | Mgat2               | Pmel1               |
| Spry1                      |                        | Mpeg1               | Pphln1              |
| Stat3                      |                        | Mrpl43/Sema4g/Peo1  | Ppm1h               |
| Stx1a                      |                        | Mrps33              | Ppp1r9b             |
| Tap1                       |                        | Mxd4                | Prdm2               |
| Tatdn1/Rnf139              |                        | Nacc1               | Prkar2b             |
| Tceal3/Tceal6/Tceal5       |                        | Nae1                | Pspe1               |
| Tig                        |                        | Nbeal2              | Pten                |
| Tmcc1                      |                        | Nfyb                | Pter2               |
| Tnfrsf9                    |                        | Nr4a2               | Pts                 |
| Topors/2010003O02Rik       |                        | Nr4a3               | Qdpr                |
| Tox                        |                        | Ociad1              | Rab14               |
| Traf3                      |                        | Ode1                | Rab40b              |
| Traf5                      |                        | Padi2               | Rab711              |
| Trib1                      |                        | Pdcd1               | Rad9b               |
| Tspyl2                     |                        | Plekha2             | Ramp1               |
| Tuba4a                     |                        | Plk3                | Rapgef6             |
| Vtal                       |                        | Pop4                | Rasa3               |
| Ypel5                      |                        | Ppih/Gm17748        | Rcbtb1              |
| Ze3h12a                    |                        | Ppp3cb              | Rcbtb2              |
| Ze3h12c                    |                        | Ppp3cc              | Recql/Pyroxd1       |

|         |  |                      |                   |
|---------|--|----------------------|-------------------|
| Zland5  |  | Pqlc3                | Rfx3              |
| Zfp361l |  | Prdx1/LOC100862012   | Rnf115            |
| Zmym2   |  | Prked                | Rnf41             |
| Znrf1   |  | Prl8a8               | Rpfl              |
|         |  | Prrc2c               | Rpl18a            |
|         |  | Psm8                 | Rps15a            |
|         |  | Ptger4               | Rps6ka1           |
|         |  | Ptpre                | Rps6kc1           |
|         |  | Rab19                | Rsph4a            |
|         |  | Rab8b                | Rwdd4a            |
|         |  | Rbbp7                | Rxb               |
|         |  | Rbm18/Mrrf           | Sbds              |
|         |  | Rbm22                | Sdad1             |
|         |  | Rgs1                 | Sdha              |
|         |  | Rgs16                | Sec13             |
|         |  | Rpl221l/Gm15421      | Sec22b            |
|         |  | Rpl27                | Sema4f            |
|         |  | Rpl27-ps2            | Sfxn2             |
|         |  | Rpl36a/Rpl36al       | She               |
|         |  | S100a10              | Skap1             |
|         |  | S100a4               | Slamf6            |
|         |  | S100a6               | Slc26a10/B4galnt1 |
|         |  | Samd3                | Slc43a2           |
|         |  | Sars2                | Slnf5             |
|         |  | Setd8                | Snx12             |
|         |  | Sft2d1               | Spes2             |
|         |  | Slc16a6/LOC100503496 | Spna2             |
|         |  | Slc25a3/LOC100046151 | Stard5            |
|         |  | Slc38a2              | Stau1             |
|         |  | Slc3a2               | Stx6              |
|         |  | Smarcc1              | Suv420h1          |
|         |  | Smarcc1              | Tardbp/Masp2      |
|         |  | Smek1                | Tas2r114          |
|         |  | Snrpd2               | Tbc1d22b          |
|         |  | Snx10                | Tcf12             |
|         |  | Son                  | Tcf3              |
|         |  | Spata13              | Tcf7              |
|         |  | Ssty2                | Tcigr1            |
|         |  | Stat3                | Tera-V8           |
|         |  | Stat6                | Terb-J            |
|         |  | Surf1/Surf2          | Tex9              |
|         |  | Taf15                | Timm8a1           |
|         |  | Tcf4                 | Tlr1              |
|         |  | Tcrg-V2              | Tm6sf1/Hdgfrp3    |
|         |  | Tex10/Invs           | Tnik              |
|         |  | Tex2                 | Trak2             |
|         |  | Figit                | Trav12n-1         |
|         |  | Tmed2                | Trpm7             |
|         |  | Tmem50b              | Tuba3a/Tuba3b     |
|         |  | Tmem63a              | Tubal3            |
|         |  | Tmem88/Lsmd1         | Tubgcp4/Trp53bp1  |
|         |  | Tmpo                 | Utp14a            |
|         |  | Tnfr3                | Vat1              |
|         |  | Tnfrsf9              | Vbp1              |
|         |  | Trappe6b             | Vmn2r96           |
|         |  | Trf/Srprb            | Vps26b            |
|         |  | Ttc38                | Vps8              |
|         |  | Txn1                 | Wapal             |
|         |  | Ubash3a              | Wdfy1             |
|         |  | Ube2l3               | Wtap              |
|         |  | Ubl3                 | Xist              |
|         |  | Ubp1/Fbxl2           | Xlr5a/Xlr5b/Xlr5c |
|         |  | Uhrf2                | Xrec3             |
|         |  | Usp48                | Xrec5             |
|         |  | Vim/LOC100862060     | Xrn1              |
|         |  | Wdr45l               | Yeats4            |
|         |  | Wipi2                | Yipf6             |
|         |  | Xlr4b/Xlr4a/Xlr4c    | Zbtb22            |
|         |  | Zbtb44               | Zcche7            |
|         |  | Zc3h12d              | Zfml              |
|         |  | Zc3h13               | Zfp157            |
|         |  | Zfp36                | Zfp330            |
|         |  | Zmiz2                | Zfp826            |
|         |  | Zmynd11              | Zgpat             |

**Supplemental Table 1. Transcription profiles of published T cell programs compared to tumor-specific TIL.** Gene sets were compiled from previously published lists of differentially expressed genes associated with CD8+ T cell programs that are most relevant to TASP T cells.

**Supplemental Table 2. Overlap between hypofunctional CD8+ T cell programs that share increased gene expression with TASPR TIL**

| 75 (a)            |                            |                      |                                       |                    |              |
|-------------------|----------------------------|----------------------|---------------------------------------|--------------------|--------------|
| Anln              | Cdca3                      | E2f1                 | Kif11                                 | Ndrgr1             | Rrm1         |
| Apitd1            | Cdca5                      | Ecm1                 | Kif15                                 | Nmral1             | Scamp1       |
| Aurka             | Cdca7                      | Esp11                | Kif18b                                | Nrgn               | Sgol1        |
| Bcat1             | Cenpa                      | Fancd2               | Kif22                                 | Pbk                | Sh3bp2       |
| Birc5             | Cenph                      | Fen1                 | Kif2c                                 | Plk1               | Spag5        |
| Bub1b             | Cenpm                      | Galk1/Itgb4          | Kntc1                                 | Ppa1               | Spc25        |
| Capg              | Cenpn                      | Gtse1                | Lig1                                  | Ppic               | Tcf19        |
| Ccdc99            | Chaf1b                     | H2afx                | Lmnb1                                 | Psat1/LOC100047252 | Tk1          |
| Cdc20             | Chtf18                     | Hist1h2ak            | Mcm10                                 | Ptpla              | Tpi1         |
| Cdc45             | Clspn                      | Hist1h2bh            | Mcm2                                  | Rad51              | Tyms-ps      |
| Cdc6              | D17H6S56E-5                | Hist1h2bm            | Mcm5                                  | Rad54b/Fsbp        | Tyms/Tyms-ps |
| Cdca2             | Dctpp1                     | Hmgn3                | Ncapd2                                | Rad54l             | Uhrf1        |
|                   |                            |                      | Ncapb                                 | Rcc1               | Xcl1         |
| 110 (b)           |                            |                      |                                       |                    |              |
| 1110067D22Rik     | Cd160                      | Entpd1               | Isg20                                 | Nrp1               | S100a11      |
| 1810035L17Rik/Nrp | Cd200                      | Etf1                 | Itgav                                 | Nucb1              | S100a4       |
| 5730469M10Rik     | Cd244/LOC677008 (2B4)      | Fgl2                 | Itih5                                 | Pawr               | Serpnb6a     |
| Acot7             | Cd9                        | Gapdh                | Klra3/LOC100862437/LOC100862410/Klra5 | Pdcd1 (PD-1)       | Serpnb9      |
| Alcam             | Chek1                      | Gas2                 | Klra9/Klra3/Klra10                    | Penk               | Sh3bgr1      |
| Anxa2             | Chl1                       | Gdpd5                | Kpna2                                 | Perp               | Sle29a1      |
| Atf1/Gm1862       | Cit                        | Glrx                 | Lat2                                  | Pglyrp1            | Smc2         |
| BC055004          | Clic4                      | Gm12070/Gapdh        | Lclat1                                | Plin2              | Sypl         |
| Bhlhe40           | Cox17                      | Gm5068               | Lgals1                                | Plk4               | Tacc3        |
| Bub1              | Cpsf2                      | Gm5177               | Lgals3                                | Plscr1             | Tank         |
| C330027C09Rik     | Cpt2                       | Gm5523/Gapdh/Gm12070 | Lilrb4                                | Pqlc3              | Tfdp1        |
| Casp3             | Cxcl10                     | Gpd2                 | Lman2                                 | Prdm1 (Blimp-1)    | Tmem109      |
| Casp4             | Cyfp1                      | Gpr56                | Ly6a                                  | Ptger2             | Tnfrsf1b     |
| Ccdc50            | Dock7                      | Gpr65                | Mdfic                                 | Ptpn13             | Trim47       |
| Ccl3              | E2f8                       | Gzmb                 | Mki67                                 | Rcn1               | Txn1         |
| Ccnb2             | Ect2                       | Ifih1                | Mx1                                   | Rhoq/Pigf          | Ube2t        |
| Cerl2             | Eea1                       | Irf8                 | Nfil3                                 | Romo1              | Vamp8        |
|                   | Ell2                       | Isg15                | Nped/Cbx6/Nptxr                       | Rpa2               | Vmp1         |
|                   |                            |                      | Nr4a2                                 | Rsad2              | Wbp5         |
| 12 (c)            | 30 (d)                     |                      | 11 (e)                                | 3 (f)              | 0 (g)        |
| Crem              | Atf3                       | Parvb                | 2810417H13Rik                         | Endod1             | X            |
| Cyth3             | Bst2                       | Parvg                | Cenb1/Gm5593                          | Nrn1               |              |
| Ephx1             | Cblb                       | Pes1                 | Cdk1                                  | Ptprs              |              |
| Gpm6b             | Cct6a                      | Phlda1               | Figl1                                 |                    |              |
| Hspa41            | Cltb                       | Ptprij               | Lag3                                  |                    |              |
| Ikzf2             | Dusp16                     | Rab27a               | Mad2l1/LOC100045924                   |                    |              |
| Marcks            | Dusp4                      | Sema7a               | Nusap1/Oip5                           |                    |              |
| Nab2              | Hdgf                       | Sle7a5               | Prc1                                  |                    |              |
| Prmt2             | Hip1                       | Snx9                 | Rrm2                                  |                    |              |
| Soat1             | Hspd1                      | Spry1                | Tnfrsf9 (4-1BB)                       |                    |              |
| Synj2             | Ier3ip1/Hdhd2              | Stat3                | Top2a                                 |                    |              |
| Ypel2             | Lix11                      | Tatdn1/Rnf139        |                                       |                    |              |
|                   | Ndufc2/LOC675851/LOC635087 | Tfg                  |                                       |                    |              |
|                   | Nfat5                      | Trib1                |                                       |                    |              |
|                   | Otud7b                     | Zc3h12c              |                                       |                    |              |
| 3 (h)             | 4 (i)                      | 1 (j)                | 1 (k)                                 | 0 (l)              | 0 (m)        |
| Itm2a             | Ctla4                      | Tox                  | Rgs16                                 | X                  | X            |
| Mcm6              | Gem                        |                      |                                       |                    |              |
| Pkm               | Irf4                       |                      |                                       |                    |              |
|                   | Ndfip1                     |                      |                                       |                    |              |
| 0 (n)             | 0 (o)                      |                      |                                       |                    |              |
| X                 | X                          |                      |                                       |                    |              |

**Supplemental Table 2. Overlap between hypofunctional CD8+ T cell programs that share increased gene expression with TASP1 TIL.** Overlap of genes up-regulated by hypofunctional CD8+ T cells that comprised the Leading Edge [30] of gene sets enriched among genes up-regulated by TASP1 TIL were compared for overlap by the Venn diagram in Figure 3B. An “X” indicates that no genes were in this category.

**Supplemental Table 3. The molecular profile of TIL consists of 1164 differentially expressed genes between tumor-specific CD8<sup>+</sup> T cells from the tumor and spleen**

| Cluster    | Probe ID | Gene Symbol   | Fold-change<br>TIL <sub>tumor</sub> / Sp <sub>tumor</sub> | Gene type(s)                                                                                                                            |
|------------|----------|---------------|-----------------------------------------------------------|-----------------------------------------------------------------------------------------------------------------------------------------|
| Cluster 01 | 10407072 | Elovl7        | -5.60                                                     | Acyltransferase                                                                                                                         |
| Cluster 01 | 10420131 | Rabggta       | -2.60                                                     | Acyltransferase                                                                                                                         |
| Cluster 01 | 10351197 | Sell          | -13.09                                                    | Adpolipoprotein, receptor, metalloprotease, serine protease, complement component, cell adhesion molecule                               |
| Cluster 01 | 10356880 | St8sia4       | -2.57                                                     | Alpha-N-acetylneuraminate alpha-2,8-sialyltransferase activity                                                                          |
| Cluster 01 | 10473367 | Slc43a1       | -2.75                                                     | Amino acid transporter                                                                                                                  |
| Cluster 01 | 10471154 | Ass1/Gm5424   | -3.21                                                     | Argininosuccinate synthase                                                                                                              |
| Cluster 01 | 10363541 | Ass1/Gm5424   | -3.18                                                     | Argininosuccinate synthase                                                                                                              |
| Cluster 01 | 10549102 | Kcnj8         | -3.24                                                     | ATP binding, ATP-activated inward rectifier potassium channel activity                                                                  |
| Cluster 01 | 10479463 | Slc17a9       | -2.98                                                     | Cation transporter                                                                                                                      |
| Cluster 01 | 10443764 | Slc37a1       | -2.28                                                     | Cation transporter                                                                                                                      |
| Cluster 01 | 10522335 | Atp10d        | -6.32                                                     | Cation transporter, hydrolase                                                                                                           |
| Cluster 01 | 10468898 | Lax1          | -3.66                                                     | Cation transporter, hydrolase                                                                                                           |
| Cluster 01 | 10491486 | Atp11b        | -2.21                                                     | Cation transporter, hydrolase                                                                                                           |
| Cluster 01 | 10406111 | Slc12a7       | -3.24                                                     | Cation: chloride symporter activity                                                                                                     |
| Cluster 01 | 10359816 | Pogk          | -2.15                                                     | Centromere DNA-binding protein                                                                                                          |
| Cluster 01 | 10389207 | Ccl5 (RANTES) | -3.29                                                     | Chemokine                                                                                                                               |
| Cluster 01 | 10565218 | Il16          | -2.45                                                     | Cytokine, interleukin superfamily                                                                                                       |
| Cluster 01 | 10378549 | Rtn4rl1       | -4.79                                                     | Cytokine, receptor, extracellular matrix protein                                                                                        |
| Cluster 01 | 10499655 | Il6ra (CD126) | -2.68                                                     | Cytokine, type I cytokine receptor, defense/immunity protein                                                                            |
| Cluster 01 | 10477649 | Acss2         | -2.97                                                     | Dehydrogenase ligase                                                                                                                    |
| Cluster 01 | 10488482 | Acss1         | -2.28                                                     | Dehydrogenase ligase                                                                                                                    |
| Cluster 01 | 10387316 | Chd3          | -3.80                                                     | DNA helicase, helicase                                                                                                                  |
| Cluster 01 | 10503190 | Chd7          | -2.98                                                     | DNA helicase, helicase                                                                                                                  |
| Cluster 01 | 10377537 | Chd3          | -2.77                                                     | DNA helicase, helicase                                                                                                                  |
| Cluster 01 | 10494428 | Txnip         | -2.89                                                     | Enzyme inhibitor activity                                                                                                               |
| Cluster 01 | 10472235 | Dapl1         | -5.90                                                     | Enzyme modulator                                                                                                                        |
| Cluster 01 | 10402730 | Ppp1r13b      | -2.68                                                     | Enzyme modulator                                                                                                                        |
| Cluster 01 | 10469867 | Pnpla7        | -2.28                                                     | Esterase                                                                                                                                |
| Cluster 01 | 10411235 | Iqgap2        | -3.14                                                     | G-protein coupled modulator                                                                                                             |
| Cluster 01 | 10364650 | Hmha1         | -2.82                                                     | G-protein coupled modulator                                                                                                             |
| Cluster 01 | 10501586 | S1pr1         | -38.24                                                    | G-protein coupled receptor                                                                                                              |
| Cluster 01 | 10591494 | S1pr5         | -10.63                                                    | G-protein coupled receptor                                                                                                              |
| Cluster 01 | 10422493 | Gpr18         | -6.35                                                     | G-protein coupled receptor                                                                                                              |
| Cluster 01 | 10371217 | S1pr4         | -3.83                                                     | G-protein coupled receptor                                                                                                              |
| Cluster 01 | 10459288 | Adrb2         | -3.57                                                     | G-protein coupled receptor                                                                                                              |
| Cluster 01 | 10422496 | Gpr183        | -3.21                                                     | G-protein coupled receptor                                                                                                              |
| Cluster 01 | 10411226 | F2r11         | -2.80                                                     | G-protein coupled receptor                                                                                                              |
| Cluster 01 | 10590365 | Vipr1         | -2.64                                                     | G-protein coupled receptor, antibacterial response protein                                                                              |
| Cluster 01 | 10590381 | Vipr1         | -2.30                                                     | G-protein coupled receptor, antibacterial response protein                                                                              |
| Cluster 01 | 10606058 | Cxcr3         | -16.15                                                    | G-protein coupled receptor, immunoglobulin receptor superfamily, protein phosphatase, immunoglobulin superfamily cell adhesion molecule |
| Cluster 01 | 10357472 | Cxcr4         | -13.47                                                    | G-protein coupled receptor, immunoglobulin receptor superfamily, protein phosphatase, immunoglobulin superfamily cell adhesion molecule |
| Cluster 01 | 10590620 | Ccr9          | -2.13                                                     | G-protein coupled receptor, immunoglobulin receptor superfamily, protein phosphatase, immunoglobulin superfamily cell adhesion molecule |
| Cluster 01 | 10441601 | Tagap         | -6.81                                                     | G-protein modulator                                                                                                                     |
| Cluster 01 | 10382228 | Axin2         | -3.78                                                     | G-protein modulator                                                                                                                     |
| Cluster 01 | 10455259 | Arhgap26      | -3.57                                                     | G-protein modulator                                                                                                                     |
| Cluster 01 | 10388310 | Rap1gap2      | -2.50                                                     | G-protein modulator                                                                                                                     |
| Cluster 01 | 10565994 | Art2b         | -7.94                                                     | Glycosyltransferase                                                                                                                     |
| Cluster 01 | 10556598 | Xylt1         | -2.28                                                     | Glycosyltransferase                                                                                                                     |
| Cluster 01 | 10429160 | St3gal1       | -2.27                                                     | Glycosyltransferase                                                                                                                     |
| Cluster 01 | 10555303 | Pgm211        | -2.77                                                     | Glycosyltransferase, mutase                                                                                                             |
| Cluster 01 | 10604751 | Fgf13         | -4.16                                                     | Growth factor                                                                                                                           |
| Cluster 01 | 10407281 | Esm1          | -2.11                                                     | Growth factor                                                                                                                           |
| Cluster 01 | 10460968 | Rasgrp2       | -13.86                                                    | Guanyl-nucleotide exchange factor                                                                                                       |
| Cluster 01 | 10472860 | Rapgef4       | -2.47                                                     | Guanyl-nucleotide exchange factor                                                                                                       |
| Cluster 01 | 10569733 | Arhgef18      | -5.21                                                     | Gyanyl-nucleotide exchange factor                                                                                                       |
| Cluster 01 | 10413419 | Arhgef3       | -4.40                                                     | Gyanyl-nucleotide exchange factor                                                                                                       |
| Cluster 01 | 10386951 | Hs3st3b1      | -2.25                                                     | Heparan sulfate-glucosamine 3-sulfotransferase 1                                                                                        |

|            |          |                         |        |                                                                                               |
|------------|----------|-------------------------|--------|-----------------------------------------------------------------------------------------------|
| Cluster 01 | 10544150 | Jhdm1d (Kdm7a)          | -3.52  | Histone demethylase activity (H3-K27 specific), histone demethylase activity (H3-K9 specific) |
| Cluster 01 | 10432619 | Pou6f1                  | -2.28  | Homeobox transcription factor                                                                 |
| Cluster 01 | 10424213 | Zhx2                    | -2.89  | Homeobox transcription factor, nucleic acid binding                                           |
| Cluster 01 | 10443535 | Tbc1d22b                | -2.27  | Hydrolase, G-protein modulator                                                                |
| Cluster 01 | 10394054 | Cd7                     | -6.66  | Immunoglobulin receptor superfamily                                                           |
| Cluster 01 | 10362097 | H60b                    | -4.10  | Immunoglobulin receptor superfamily, major histocompatibility complex antigen                 |
| Cluster 01 | 10393408 | Tmc6                    | -2.04  | Ion channel                                                                                   |
| Cluster 01 | 10373542 | Dgka                    | -5.10  | Kinase                                                                                        |
| Cluster 01 | 10518686 | Pik3cd                  | -2.21  | Kinase                                                                                        |
| Cluster 01 | 10383010 | Socs3                   | -2.25  | Kinase inhibitor                                                                              |
| Cluster 01 | 10362275 | Samd3                   | -5.60  | Kinase modulator                                                                              |
| Cluster 01 | 10549282 | Itp2                    | -2.52  | Ligand-gated ion channel                                                                      |
| Cluster 01 | 10511739 | Cpne3                   | -2.53  | Membrane traffic protein                                                                      |
| Cluster 01 | 10446777 | Ehd3                    | -2.87  | Membrane traffic protein, G-protein modulator, calcium-binding protein                        |
| Cluster 01 | 10402142 | Ccde88c                 | -2.79  | Membrane traffic protein, kinase modulator                                                    |
| Cluster 01 | 10545608 | Sema4f                  | -2.11  | Membrane-bound signaling molecule                                                             |
| Cluster 01 | 10542120 | Clec2i                  | -3.90  | Membrane-bound signaling molecule, receptor, defense/immunity protein                         |
| Cluster 01 | 10380135 | Mir142                  | -6.19  | microRNA                                                                                      |
| Cluster 01 | 10350247 | Kif21b                  | -3.73  | Microtubule binding motor protein                                                             |
| Cluster 01 | 10566258 | Hbb-b1/Hbb-b2/Beta-s    | -66.23 | Misc.                                                                                         |
| Cluster 01 | 10566254 | Hbb-b1/Hbb-b2/Beta-s    | -54.36 | Misc.                                                                                         |
| Cluster 01 | 10375051 | Hba-a1/Hba-a2           | -27.88 | Misc.                                                                                         |
| Cluster 01 | 10375058 | Hba-a1/Hba-a2           | -27.74 | Misc.                                                                                         |
| Cluster 01 | 10497337 | Car1                    | -24.15 | Misc.                                                                                         |
| Cluster 01 | 10563099 | Snord35b                | -17.65 | Misc.                                                                                         |
| Cluster 01 | 10404132 | Cmah                    | -17.12 | Misc.                                                                                         |
| Cluster 01 | 10404152 | Fam65b                  | -14.49 | Misc.                                                                                         |
| Cluster 01 | 10389190 | Gm11435                 | -9.40  | Misc.                                                                                         |
| Cluster 01 | 10533182 | Dtx1/Gm19706            | -7.80  | Misc.                                                                                         |
| Cluster 01 | 10468527 | 5830416P10Rik           | -7.34  | Misc.                                                                                         |
| Cluster 01 | 10388488 | Fam101b                 | -7.20  | Misc.                                                                                         |
| Cluster 01 | 10573054 | Gypa                    | -7.13  | Misc.                                                                                         |
| Cluster 01 | 10570516 | Kbtbd11                 | -6.79  | Misc.                                                                                         |
| Cluster 01 | 10490923 | Car2                    | -6.14  | Misc.                                                                                         |
| Cluster 01 | 10375019 | Nsg2                    | -6.13  | Misc.                                                                                         |
| Cluster 01 | 10603814 | Slc9a7                  | -6.02  | Misc.                                                                                         |
| Cluster 01 | 10427454 | Card6                   | -5.83  | Misc.                                                                                         |
| Cluster 01 | 10378833 | Ssh2                    | -5.65  | Misc.                                                                                         |
| Cluster 01 | 10378855 | Ssh2                    | -5.52  | Misc.                                                                                         |
| Cluster 01 | 10570513 | Kbtbd11                 | -5.48  | Misc.                                                                                         |
| Cluster 01 | 10569719 | A430078G23Rik           | -5.46  | Misc.                                                                                         |
| Cluster 01 | 10392910 | C630004H02Rik           | -5.40  | Misc.                                                                                         |
| Cluster 01 | 10377265 | Pik3r5                  | -5.28  | Misc.                                                                                         |
| Cluster 01 | 10414731 | 10414731                | -5.21  | Misc.                                                                                         |
| Cluster 01 | 10543785 | AB041803                | -5.02  | Misc.                                                                                         |
| Cluster 01 | 10367532 | Tespa1                  | -4.92  | Misc.                                                                                         |
| Cluster 01 | 10358717 | 1700025G04Rik           | -4.83  | Misc.                                                                                         |
| Cluster 01 | 10455784 | Gramd3                  | -4.76  | Misc.                                                                                         |
| Cluster 01 | 10501007 | Chi317                  | -4.40  | Misc.                                                                                         |
| Cluster 01 | 10591739 | Acp5                    | -4.32  | Misc.                                                                                         |
| Cluster 01 | 10531126 | Igj                     | -4.25  | Misc.                                                                                         |
| Cluster 01 | 10394593 | Fam49a                  | -4.15  | Misc.                                                                                         |
| Cluster 01 | 10382449 | Rab37                   | -4.11  | Misc.                                                                                         |
| Cluster 01 | 10393544 | Cyth1                   | -3.91  | Misc.                                                                                         |
| Cluster 01 | 10545184 | 10545184                | -3.81  | Misc.                                                                                         |
| Cluster 01 | 10463164 | Frat1                   | -3.73  | Misc.                                                                                         |
| Cluster 01 | 10587854 | Slc9a9                  | -3.62  | Misc.                                                                                         |
| Cluster 01 | 10356932 | D1Ert622e               | -3.62  | Misc.                                                                                         |
| Cluster 01 | 10498998 | D930015E06Rik           | -3.53  | Misc.                                                                                         |
| Cluster 01 | 10400137 | Dnajb9                  | -3.31  | Misc.                                                                                         |
| Cluster 01 | 10557481 | Ypel3                   | -3.26  | Misc.                                                                                         |
| Cluster 01 | 10584762 | Bcl9l                   | -3.19  | Misc.                                                                                         |
| Cluster 01 | 10416371 | Lpar6/Rb1               | -3.16  | Misc.                                                                                         |
| Cluster 01 | 10481574 | Fam78a                  | -3.16  | Misc.                                                                                         |
| Cluster 01 | 10401428 | C130039O16Rik (Elmsan1) | -3.14  | Misc.                                                                                         |

|            |          |                             |       |       |
|------------|----------|-----------------------------|-------|-------|
| Cluster 01 | 10467650 | Frat2                       | -3.01 | Misc. |
| Cluster 01 | 10533007 | Ccdc64                      | -3.00 | Misc. |
| Cluster 01 | 10565990 | Art2a-ps                    | -3.00 | Misc. |
| Cluster 01 | 10546010 | Arhgap25                    | -2.95 | Misc. |
| Cluster 01 | 10520388 | Rbm33                       | -2.94 | Misc. |
| Cluster 01 | 10545065 | Gprin3                      | -2.92 | Misc. |
| Cluster 01 | 10397476 | 2310044G17Rik               | -2.90 | Misc. |
| Cluster 01 | 10538123 | Gimap9                      | -2.89 | Misc. |
| Cluster 01 | 10425799 | Rnu12                       | -2.86 | Misc. |
| Cluster 01 | 10530612 | Fryl                        | -2.85 | Misc. |
| Cluster 01 | 10534570 | Orai2                       | -2.84 | Misc. |
| Cluster 01 | 10568586 | Fam53b                      | -2.84 | Misc. |
| Cluster 01 | 10500100 | Tnfaip812                   | -2.81 | Misc. |
| Cluster 01 | 10379630 | Slfn2                       | -2.78 | Misc. |
| Cluster 01 | 10550365 | Prkd2                       | -2.76 | Misc. |
| Cluster 01 | 10425410 | Grap2                       | -2.73 | Misc. |
| Cluster 01 | 10497237 | Pagl                        | -2.72 | Misc. |
| Cluster 01 | 10409767 | Golm1                       | -2.71 | Misc. |
| Cluster 01 | 10430649 | Cbx7                        | -2.70 | Misc. |
| Cluster 01 | 10359303 | 4930562F07Rik               | -2.70 | Misc. |
| Cluster 01 | 10447629 | Tagap1/Tagap/Fgfr1op        | -2.66 | Misc. |
| Cluster 01 | 10549162 | St8sia1                     | -2.65 | Misc. |
| Cluster 01 | 10406905 | Ccdc125                     | -2.61 | Misc. |
| Cluster 01 | 10436426 | Orai2                       | -2.59 | Misc. |
| Cluster 01 | 10571344 | D8Ert82e (SGK223)           | -2.59 | Misc. |
| Cluster 01 | 10350977 | 4930523C07Rik/4930562F07Rik | -2.55 | Misc. |
| Cluster 01 | 10530592 | Fryl                        | -2.54 | Misc. |
| Cluster 01 | 10532150 | Fam69a                      | -2.51 | Misc. |
| Cluster 01 | 10439058 | Lrrc33 (Nrros)              | -2.50 | Misc. |
| Cluster 01 | 10566438 | Fam160a2                    | -2.49 | Misc. |
| Cluster 01 | 10440099 | St3gal6/Dbld2               | -2.46 | Misc. |
| Cluster 01 | 10443027 | A930001N09Rik               | -2.45 | Misc. |
| Cluster 01 | 10469695 | Apbb1ip                     | -2.45 | Misc. |
| Cluster 01 | 10458098 | Pkd2l2/Fam13b               | -2.44 | Misc. |
| Cluster 01 | 10380514 | Fam117a                     | -2.43 | Misc. |
| Cluster 01 | 10468525 | 5830416P10Rik (Mirt1)       | -2.43 | Misc. |
| Cluster 01 | 10520043 | Lhfp13                      | -2.42 | Misc. |
| Cluster 01 | 10530563 | Fryl                        | -2.42 | Misc. |
| Cluster 01 | 10434302 | Klhl24                      | -2.41 | Misc. |
| Cluster 01 | 10358978 | Ier5                        | -2.41 | Misc. |
| Cluster 01 | 10390574 | Fbxl20                      | -2.37 | Misc. |
| Cluster 01 | 10382935 | Tnrc6c                      | -2.36 | Misc. |
| Cluster 01 | 10460787 | Atg2a                       | -2.36 | Misc. |
| Cluster 01 | 10528036 | 10528036                    | -2.35 | Misc. |
| Cluster 01 | 10583669 | AB124611                    | -2.35 | Misc. |
| Cluster 01 | 10380059 | Rnu3b1/Rnu3b2/Rnu3b4/Rnu3b3 | -2.34 | Misc. |
| Cluster 01 | 10380061 | Rnu3b1/Rnu3b2/Rnu3b4/Rnu3b3 | -2.34 | Misc. |
| Cluster 01 | 10380063 | Rnu3b1/Rnu3b2/Rnu3b4/Rnu3b3 | -2.34 | Misc. |
| Cluster 01 | 10380065 | Rnu3b1/Rnu3b2/Rnu3b4/Rnu3b3 | -2.34 | Misc. |
| Cluster 01 | 10528723 | Mll3 (Kmt2c)                | -2.34 | Misc. |
| Cluster 01 | 10426042 | Gramd4                      | -2.34 | Misc. |
| Cluster 01 | 10456719 | 10456719                    | -2.33 | Misc. |
| Cluster 01 | 10591263 | Fbxl12/Ubl5                 | -2.32 | Misc. |
| Cluster 01 | 10571302 | Tmem66 (Saraf)              | -2.31 | Misc. |
| Cluster 01 | 10358191 | Camsap2                     | -2.31 | Misc. |
| Cluster 01 | 10492826 | Fbxw7/Dear1                 | -2.29 | Misc. |
| Cluster 01 | 10524229 | A630023P12Rik               | -2.29 | Misc. |
| Cluster 01 | 10358713 | 1700025G04Rik               | -2.28 | Misc. |
| Cluster 01 | 10441115 | Brwd1                       | -2.28 | Misc. |
| Cluster 01 | 10587012 | Ccpg1                       | -2.27 | Misc. |
| Cluster 01 | 10560202 | Gltscr1                     | -2.26 | Misc. |
| Cluster 01 | 10457022 | Mbp                         | -2.25 | Misc. |
| Cluster 01 | 10390186 | Abi3/Phospho1               | -2.24 | Misc. |
| Cluster 01 | 10375083 | Stk10                       | -2.24 | Misc. |
| Cluster 01 | 10577230 | Erich1                      | -2.23 | Misc. |
| Cluster 01 | 10493626 | 1700094D03Rik               | -2.22 | Misc. |
| Cluster 01 | 10380477 | Ppp1r9b                     | -2.20 | Misc. |
| Cluster 01 | 10567171 | Snord14a/Rps13              | -2.19 | Misc. |
| Cluster 01 | 10487595 | 10487595                    | -2.19 | Misc. |



|            |          |                   |        |                                                                                                                |
|------------|----------|-------------------|--------|----------------------------------------------------------------------------------------------------------------|
| Cluster 01 | 10528090 | Rundc3b           | -2.18  | Misc.                                                                                                          |
| Cluster 01 | 10432473 | Nckap5l           | -2.18  | Misc.                                                                                                          |
| Cluster 01 | 10456721 | 10456721          | -2.18  | Misc.                                                                                                          |
| Cluster 01 | 10585905 | Parp6             | -2.17  | Misc.                                                                                                          |
| Cluster 01 | 10449854 | Akap8l            | -2.13  | Misc.                                                                                                          |
| Cluster 01 | 10426535 | Fam113b/Amigo2    | -2.13  | Misc.                                                                                                          |
| Cluster 01 | 10568780 | Mapk1ip1          | -2.10  | Misc.                                                                                                          |
| Cluster 01 | 10503484 | Fam82b            | -2.09  | Misc.                                                                                                          |
| Cluster 01 | 10407370 | 4833420G17Rik     | -2.02  | Misc.                                                                                                          |
| Cluster 01 | 10439583 | Sidt1             | -13.82 | Misc.                                                                                                          |
| Cluster 01 | 10503259 | Trp53inp1 (S1P)   | -7.63  | Misc.                                                                                                          |
| Cluster 01 | 10419966 | Zfhx2/Zfhx2as     | -2.58  | Misc.                                                                                                          |
| Cluster 01 | 10552276 | Ube2h             | -2.47  | Misc.                                                                                                          |
| Cluster 01 | 10509379 | Usp48             | -2.46  | Misc.                                                                                                          |
| Cluster 01 | 10512480 | Sit1              | -2.43  | Misc.                                                                                                          |
| Cluster 01 | 10543686 | Ube2h             | -2.40  | Misc.                                                                                                          |
| Cluster 01 | 10383982 | Znrf3             | -2.25  | Misc.                                                                                                          |
| Cluster 01 | 10412038 | Zswim6            | -2.23  | Misc.                                                                                                          |
| Cluster 01 | 10503551 | Usp45             | -2.17  | Misc.                                                                                                          |
| Cluster 01 | 10378649 | Slc43a2           | -2.15  | Misc.                                                                                                          |
| Cluster 01 | 10506569 | Usp24             | -2.13  | Misc.                                                                                                          |
| Cluster 01 | 10383632 | Sfi1/LOC100861749 | -2.08  | Misc.                                                                                                          |
| Cluster 01 | 10494160 | Tmod4             | -2.17  | Non-motor actin binding protein                                                                                |
| Cluster 01 | 10575120 | Sntb2             | -2.10  | Non-motor actin binding protein                                                                                |
| Cluster 01 | 10357604 | Ikbke             | -3.05  | Non-receptor serine/threonine protein kinase                                                                   |
| Cluster 01 | 10420413 | Lats2             | -2.34  | Non-receptor serine/threonine protein kinase, annexin, calmodulin                                              |
| Cluster 01 | 10500813 | Hipk1             | -2.61  | Non-receptor serine/threonine protein kinase, non-receptor tyrosine protein kinase                             |
| Cluster 01 | 10372745 | Dyrk2             | -2.57  | Non-receptor serine/threonine protein kinase, non-receptor tyrosine protein kinase                             |
| Cluster 01 | 10449527 | Stk38             | -3.89  | Non-receptor serine/threonine protein kinase, transfer/carrier protein, annexin, calmodulin                    |
| Cluster 01 | 10362073 | Sgk1              | -3.51  | Non-receptor serine/threonine protein kinase, transfer/carrier protein, annexin, calmodulin                    |
| Cluster 01 | 10479852 | Camk1d            | -2.20  | Non-receptor serine/threonine protein kinase                                                                   |
| Cluster 01 | 10362596 | Fyn               | -2.68  | Non-receptor tyrosine kinase                                                                                   |
| Cluster 01 | 10381082 | Rara              | -2.40  | Nuclear hormone receptor                                                                                       |
| Cluster 01 | 10417734 | Nr1d2             | -4.49  | Nuclear hormone receptor, receptor, nucleic acid binding                                                       |
| Cluster 01 | 10385776 | Tcf7              | -20.02 | Nucleic acid binding                                                                                           |
| Cluster 01 | 10496091 | Lef1              | -7.64  | Nucleic acid binding                                                                                           |
| Cluster 01 | 10505911 | Dmrta1            | -2.91  | Nucleic acid binding                                                                                           |
| Cluster 01 | 10422321 | Dzip1             | -2.66  | Nucleic acid binding                                                                                           |
| Cluster 01 | 10443063 | Phf1              | -2.60  | Nucleic acid binding                                                                                           |
| Cluster 01 | 10401454 | Entpd5            | -2.14  | Nucleotide phosphatase, lyase, nucleic acid binding                                                            |
| Cluster 01 | 10506786 | Zcchc11           | -2.50  | Nucleotidyltransferase                                                                                         |
| Cluster 01 | 10350697 | Nmnat2            | -2.25  | Nucleotidyltransferase                                                                                         |
| Cluster 01 | 10364460 | Gzmm              | -6.69  | Peptide hormone, receptor, serine protease, protease inhibitor, annexin, calmodulin                            |
| Cluster 01 | 10373740 | Pik3ip1           | -3.82  | Peptide hormone, receptor, serine protease, protease inhibitor, annexin, calmodulin                            |
| Cluster 01 | 10362811 | Sesn1             | -2.81  | Peroxidase                                                                                                     |
| Cluster 01 | 10555510 | Pde2a             | -15.99 | Phosphodiesterase                                                                                              |
| Cluster 01 | 10497399 | Pde7a             | -2.80  | Phosphodiesterase                                                                                              |
| Cluster 01 | 10360173 | Slamf7            | -3.21  | Protein kinase, membrane-bound signaling molecule, immunoglobulin receptor superfamily, cell adhesion molecule |
| Cluster 01 | 10360158 | Ly9 (CD229)       | -2.82  | Protein kinase, membrane-bound signaling molecule, immunoglobulin receptor superfamily, cell adhesion molecule |
| Cluster 01 | 10357191 | Ptpn4             | -2.44  | Protein phosphatase                                                                                            |
| Cluster 01 | 10563338 | Ppp1r15a          | -2.60  | protein phosphatase binding, protein phosphatase regulator activity                                            |
| Cluster 01 | 10484941 | Madd              | -2.53  | Rab guanyl-nucleotide exchange factor activity                                                                 |
| Cluster 01 | 10362896 | Cd24a             | -27.60 | Receptor                                                                                                       |
| Cluster 01 | 10365344 | Tcp1l12           | -8.00  | Receptor                                                                                                       |
| Cluster 01 | 10557895 | Itgax (CD11c)     | -5.12  | Receptor                                                                                                       |
| Cluster 01 | 10541246 | Il17ra (CD217)    | -3.74  | Receptor                                                                                                       |
| Cluster 01 | 10473125 | Itega4 (CD49d)    | -2.65  | Receptor                                                                                                       |
| Cluster 01 | 10432957 | Iteb7 (Ly69)      | -4.43  | Receptor, extracellular matrix glycoprotein, cell adhesion molecule                                            |
| Cluster 01 | 10530145 | Tlr1              | -5.65  | Receptor, extracellular matrix protein                                                                         |
| Cluster 01 | 10374560 | Zrsr1             | -2.62  | Ribonucleoprotein                                                                                              |

|            |          |              |        |                                                                                                                                                                                                                         |
|------------|----------|--------------|--------|-------------------------------------------------------------------------------------------------------------------------------------------------------------------------------------------------------------------------|
| Cluster 01 | 10453272 | Zfp3612      | -3.15  | RNA binding protein                                                                                                                                                                                                     |
| Cluster 01 | 10561453 | Zfp36        | -2.53  | RNA binding protein                                                                                                                                                                                                     |
| Cluster 01 | 10401238 | Zfp3611      | -2.40  | RNA binding protein                                                                                                                                                                                                     |
| Cluster 01 | 10412211 | Gzma         | -8.46  | Serine protease                                                                                                                                                                                                         |
| Cluster 01 | 10598467 | Pim2         | -2.54  | Serine/threonine protein kinase receptor, protein kinase                                                                                                                                                                |
| Cluster 01 | 10517301 | Ldlrap1      | -2.49  | Signaling molecule                                                                                                                                                                                                      |
| Cluster 01 | 10577190 | Rasa3        | -7.61  | Signaling molecule, G-protein modulator                                                                                                                                                                                 |
| Cluster 01 | 10415725 | Spata13      | -2.49  | Signaling molecule, guanyl-nucleotide exchange factor                                                                                                                                                                   |
| Cluster 01 | 10392177 | Icam2        | -2.88  | Signaling molecule, immunoglobulin superfamily cell adhesion molecule                                                                                                                                                   |
| Cluster 01 | 10380381 | Tob1         | -3.22  | SMAD binding, transcription corepressor activity                                                                                                                                                                        |
| Cluster 01 | 10390535 | Arl5c        | -7.19  | Small GTPase                                                                                                                                                                                                            |
| Cluster 01 | 10356475 | Arl4c        | -4.50  | Small GTPase                                                                                                                                                                                                            |
| Cluster 01 | 10567043 | Rras2        | -2.12  | Small GTPase                                                                                                                                                                                                            |
| Cluster 01 | 10411126 | Jmy          | -3.12  | Transcription coactivator activity                                                                                                                                                                                      |
| Cluster 01 | 10365428 | Btdb11       | -2.11  | Transcription cofactor, growth factor, serine protease, non-motor actin binding protein                                                                                                                                 |
| Cluster 01 | 10544891 | Nod1         | -5.20  | Transcription cofactor, nucleic acid binding                                                                                                                                                                            |
| Cluster 01 | 10474006 | Phf21a       | -2.81  | Transcription cofactor, ubiquitin-protein ligase                                                                                                                                                                        |
| Cluster 01 | 10594404 | Smad3        | -4.40  | Transcription factor                                                                                                                                                                                                    |
| Cluster 01 | 10354111 | Aff3         | -4.19  | Transcription factor                                                                                                                                                                                                    |
| Cluster 01 | 10583207 | Maml2        | -3.10  | Transcription factor                                                                                                                                                                                                    |
| Cluster 01 | 10598101 | Maml2        | -2.73  | Transcription factor                                                                                                                                                                                                    |
| Cluster 01 | 10466865 | Rfx3         | -2.52  | Transcription factor                                                                                                                                                                                                    |
| Cluster 01 | 10489961 | Nfate2       | -2.36  | Transcription factor                                                                                                                                                                                                    |
| Cluster 01 | 10574962 | Nfate3       | -2.26  | Transcription factor                                                                                                                                                                                                    |
| Cluster 01 | 10606989 | Tsc22d3      | -2.24  | Transcription factor                                                                                                                                                                                                    |
| Cluster 01 | 10362861 | Scml4        | -3.52  | Transcription factor, chromatin/chromatin-binding protein                                                                                                                                                               |
| Cluster 01 | 10467420 | Pdlim1       | -2.82  | Transcription factor, non-motor actin binding protein                                                                                                                                                                   |
| Cluster 01 | 10520950 | Pdlim1       | -2.44  | Transcription factor, non-motor actin binding protein                                                                                                                                                                   |
| Cluster 01 | 10522051 | Klf3 (Bklf)  | -8.67  | Transcription factor, nucleic acid binding                                                                                                                                                                              |
| Cluster 01 | 10572800 | Klf2 (Lklf)  | -4.64  | Transcription factor, nucleic acid binding                                                                                                                                                                              |
| Cluster 01 | 10546661 | Foxp1        | -3.49  | Transcription factor, nucleic acid binding                                                                                                                                                                              |
| Cluster 01 | 10530142 | Klf3 (Bklf)  | -2.59  | Transcription factor, nucleic acid binding                                                                                                                                                                              |
| Cluster 01 | 10557488 | Tbx6         | -2.51  | Transcription factor, nucleic acid binding                                                                                                                                                                              |
| Cluster 01 | 10397346 | Fos          | -2.41  | Transcription factor, nucleic acid binding                                                                                                                                                                              |
| Cluster 01 | 10589994 | Eomes        | -2.17  | Transcription factor, nucleic acid binding                                                                                                                                                                              |
| Cluster 01 | 10441003 | Runx1        | -2.09  | Transcription factor, nucleic acid binding                                                                                                                                                                              |
| Cluster 01 | 10438445 | Klhl6        | -5.33  | Transcription factor, serine protease, non-motor actin binding protein                                                                                                                                                  |
| Cluster 01 | 10594001 | Arid3b       | -2.71  | Transcription regulator                                                                                                                                                                                                 |
| Cluster 01 | 10396205 | Arid4a       | -2.18  | Transcription regulator                                                                                                                                                                                                 |
| Cluster 01 | 10481103 | Len4         | -2.25  | Transfer/carrier protein, isomerase                                                                                                                                                                                     |
| Cluster 01 | 10524345 | Tpst2        | -2.87  | Transferase                                                                                                                                                                                                             |
| Cluster 01 | 10547513 | Cecl5        | -2.18  | Transferase                                                                                                                                                                                                             |
| Cluster 01 | 10463997 | Pdcd4        | -2.79  | Translation elongation factor                                                                                                                                                                                           |
| Cluster 01 | 10407327 | Emb          | -16.65 | Transmembrane receptor regulatory/adaptor protein                                                                                                                                                                       |
| Cluster 01 | 10605357 | Gab3         | -4.64  | Transmembrane receptor regulatory/adaptor protein                                                                                                                                                                       |
| Cluster 01 | 10412376 | Emb          | -3.92  | Transmembrane receptor regulatory/adaptor protein                                                                                                                                                                       |
| Cluster 01 | 10558410 | Ptpre        | -2.24  | Transmembrane receptor regulatory/adaptor protein, receptor, protein phosphatase                                                                                                                                        |
| Cluster 01 | 10564631 | Slco3a1      | -6.08  | Transporter                                                                                                                                                                                                             |
| Cluster 01 | 10391649 | Slc4a1       | -4.53  | Transporter                                                                                                                                                                                                             |
| Cluster 01 | 10439239 | Dir2         | -3.11  | Transporter                                                                                                                                                                                                             |
| Cluster 01 | 10382532 | Slc16a5      | -2.41  | Transporter                                                                                                                                                                                                             |
| Cluster 01 | 10569485 | Tnfrsf26     | -8.06  | Tumor necrosis factor receptor                                                                                                                                                                                          |
| Cluster 01 | 10427628 | Il7r (CD127) | -5.74  | Type I cytokine receptor                                                                                                                                                                                                |
| Cluster 01 | 10436830 | Ifnar2       | -2.43  | Type I cytokine receptor, type II cytokine receptor                                                                                                                                                                     |
| Cluster 01 | 10351691 | Slamf6       | -17.97 | Tyrosine protein kinase receptor, membrane-bound signaling molecule, immunoglobulin receptor superfamily, tyrosine protein kinase receptor, protein kinase, immunoglobulin receptor superfamily, cell adhesion molecule |
| Cluster 01 | 10404874 | Mylip        | -3.40  | Ubiquitin protein ligase activity, ubiquitin-protein transferase activity                                                                                                                                               |
| Cluster 01 | 10374485 | Peli1        | -2.53  | Ubiquitin protein ligase activity, ubiquitin-protein transferase activity                                                                                                                                               |
| Cluster 01 | 10454202 | Rnfl38       | -3.11  | Ubiquitin-protein ligase                                                                                                                                                                                                |
| Cluster 01 | 10501879 | Usp53        | -2.36  | Ubiquitin-protein ligase                                                                                                                                                                                                |
| Cluster 01 | 10511755 | Wwp1         | -2.15  | Ubiquitin-protein ligase                                                                                                                                                                                                |

|                 |          |                    |       |                                                                                                                                         |
|-----------------|----------|--------------------|-------|-----------------------------------------------------------------------------------------------------------------------------------------|
| Cluster 01      | 10580452 | Siah1a             | -2.23 | Ubiquitin-protein transferase activity, zinc ion binding                                                                                |
| Cluster 01      | 10350046 | Kdm5b              | -2.40 | Zinc finger transcription factor                                                                                                        |
| Cluster 01      | 10479159 | Zfp831             | -3.29 | Zinc finger transcription factor, nucleic acid binding                                                                                  |
| Cluster 01      | 10402554 | Bcl11b             | -2.85 | Zinc finger transcription factor, nucleic acid binding                                                                                  |
| Cluster 01      | 10361338 | Ipcf1              | -2.72 |                                                                                                                                         |
| Cluster 02 & 03 | 10560304 | Calm1/Calm2/Calm3  | 2.09  | Calmodulin                                                                                                                              |
| Cluster 02 & 03 | 10461452 | Fen1               | 2.02  | Damaged DNA-binding protein, endodeoxyribonuclease, exodeoxyribonuclease, nuclease, hydrolase                                           |
| Cluster 02 & 03 | 10389395 | Brip1              | 3.88  | DNA helicase, helicase                                                                                                                  |
| Cluster 02 & 03 | 10510687 | Acot7 (Bach)       | 2.80  | Esterase                                                                                                                                |
| Cluster 02 & 03 | 10452648 | Emilin2            | 3.08  | Extracellular matrix glycoprotein                                                                                                       |
| Cluster 02 & 03 | 10540298 | Chl1               | 2.55  | G-protein coupled receptor, immunoglobulin receptor superfamily, protein phosphatase, immunoglobulin superfamily cell adhesion molecule |
| Cluster 02 & 03 | 10485963 | Arhgap11a          | 3.60  | G-protein modulator                                                                                                                     |
| Cluster 02 & 03 | 10584710 | H2afx              | 2.42  | Histone                                                                                                                                 |
| Cluster 02 & 03 | 10520521 | Cenpa              | 2.79  | Histone                                                                                                                                 |
| Cluster 02 & 03 | 10600017 | Hmgb3              | 2.03  | HMG-box transcription factor, signaling molecule, chromatin/chromatin-binding protein                                                   |
| Cluster 02 & 03 | 10352954 | Hmgb3              | 2.28  | HMG-box transcription factor, signaling molecule, chromatin/chromatin-binding protein                                                   |
| Cluster 02 & 03 | 10497689 | Gnb4               | 2.09  | Hydrolase, heterotrimeric G-protein                                                                                                     |
| Cluster 02 & 03 | 10441436 | Snx9               | 8.06  | Membrane trafficking regulatory protein                                                                                                 |
| Cluster 02 & 03 | 10585331 | Expf5              | 2.00  | Misc.                                                                                                                                   |
| Cluster 02 & 03 | 10439881 | 5330426P16Rik      | 2.08  | Misc.                                                                                                                                   |
| Cluster 02 & 03 | 10469505 | Commd3             | 2.14  | Misc.                                                                                                                                   |
| Cluster 02 & 03 | 10503617 | Mms22l             | 2.18  | Misc.                                                                                                                                   |
| Cluster 02 & 03 | 10420730 | Fdft1/Ctsb         | 2.20  | Misc.                                                                                                                                   |
| Cluster 02 & 03 | 10416155 | Kctd9              | 2.22  | Misc.                                                                                                                                   |
| Cluster 02 & 03 | 10515090 | Cdkn2c             | 2.27  | Misc.                                                                                                                                   |
| Cluster 02 & 03 | 10412909 | Fdft1              | 2.28  | Misc.                                                                                                                                   |
| Cluster 02 & 03 | 10588482 | Poc1a              | 2.29  | Misc.                                                                                                                                   |
| Cluster 02 & 03 | 10380289 | Mmd                | 2.35  | Misc.                                                                                                                                   |
| Cluster 02 & 03 | 10605431 | Rab39b             | 2.39  | Misc.                                                                                                                                   |
| Cluster 02 & 03 | 10345074 | Cetn4              | 2.55  | Misc.                                                                                                                                   |
| Cluster 02 & 03 | 10465861 | Incenp             | 2.56  | Misc.                                                                                                                                   |
| Cluster 02 & 03 | 10404380 | Dusp22             | 2.66  | Misc.                                                                                                                                   |
| Cluster 02 & 03 | 10575733 | Cenpn              | 2.93  | Misc.                                                                                                                                   |
| Cluster 02 & 03 | 10403413 | Idi1/Gm13502       | 2.94  | Misc.                                                                                                                                   |
| Cluster 02 & 03 | 10548086 | Rad51ap1           | 2.96  | Misc.                                                                                                                                   |
| Cluster 02 & 03 | 10560695 | Ceacam16           | 3.02  | Misc.                                                                                                                                   |
| Cluster 02 & 03 | 10482762 | Idi1/Gm13502       | 3.04  | Misc.                                                                                                                                   |
| Cluster 02 & 03 | 10482528 | Neb                | 3.45  | Misc.                                                                                                                                   |
| Cluster 02 & 03 | 10414315 | Cdkn3              | 3.46  | Misc.                                                                                                                                   |
| Cluster 02 & 03 | 10474825 | D2Ert750e          | 3.48  | Misc.                                                                                                                                   |
| Cluster 02 & 03 | 10505299 | Bspry              | 3.76  | Misc.                                                                                                                                   |
| Cluster 02 & 03 | 10608686 | 10608686           | 4.99  | Misc.                                                                                                                                   |
| Cluster 02 & 03 | 10360985 | Cenpf              | 5.21  | Misc.                                                                                                                                   |
| Cluster 02 & 03 | 10538356 | Chn2/9130019P16Rik | 5.68  | Misc.                                                                                                                                   |
| Cluster 02 & 03 | 10442219 | Zfp52              | 2.08  | Misc.                                                                                                                                   |
| Cluster 02 & 03 | 10534301 | Syna               | 3.36  | Misc.                                                                                                                                   |
| Cluster 02 & 03 | 10511363 | Penk               | 9.61  | Neuropeptide                                                                                                                            |
| Cluster 02 & 03 | 10480432 | Mastl              | 6.11  | Non-receptor serine/threonine protein kinase, transfer/carrier protein, calmodulin                                                      |
| Cluster 02 & 03 | 10544106 | Zc3hav1            | 2.11  | Nucleic acid binding                                                                                                                    |
| Cluster 02 & 03 | 10563323 | Nucb1              | 2.35  | Nucleic acid binding, annexin, calmodulin                                                                                               |
| Cluster 02 & 03 | 10456383 | Impa2              | 3.85  | Phosphatase                                                                                                                             |
| Cluster 02 & 03 | 10513158 | Ptpn3              | 4.00  | Protein phosphatase                                                                                                                     |
| Cluster 02 & 03 | 10563685 | Ptpn5              | 4.31  | Protein phosphatase                                                                                                                     |
| Cluster 02 & 03 | 10557156 | Plk1               | 3.88  | Protein serine/threonine kinase activity                                                                                                |
| Cluster 02 & 03 | 10503098 | Lyn/Gm11787        | 4.56  | Protein tyrosine kinase activity                                                                                                        |
| Cluster 02 & 03 | 10547906 | Lag3 (CD223)       | 4.96  | Transmembrane signaling receptor activity, MHC class II protein binding                                                                 |
| Cluster 02 & 04 | 10396421 | Hif1a              | 2.11  | Basic helix-loop-helix transcription factor, nucleic acid binding                                                                       |
| Cluster 02 & 04 | 10531724 | Plac8              | 2.66  | Chromatin binding                                                                                                                       |
| Cluster 02 & 04 | 10477052 | Slc52a3            | 2.08  | G-protein coupled receptor                                                                                                              |
| Cluster 02 & 04 | 10421517 | Cysltr2            | 2.49  | G-protein coupled receptor                                                                                                              |
| Cluster 02 & 04 | 10414271 | Ptger2             | 2.85  | G-protein coupled receptor                                                                                                              |

|                 |          |                        |      |                                                                                                                                         |
|-----------------|----------|------------------------|------|-----------------------------------------------------------------------------------------------------------------------------------------|
| Cluster 02 & 04 | 10597279 | Ccr12                  | 4.77 | G-protein coupled receptor, immunoglobulin receptor superfamily, protein phosphatase, immunoglobulin superfamily cell adhesion molecule |
| Cluster 02 & 04 | 10411332 | Hmger                  | 2.03 | Hydroxymethylglutaryl-CoA reductase (NADPH)                                                                                             |
| Cluster 02 & 04 | 10441195 | Dscam                  | 3.55 | Immunoglobulin receptor superfamily, protein phosphatase, immunoglobulin receptor superfamily cell adhesion molecule                    |
| Cluster 02 & 04 | 10548532 | Klra5/Klra9/Klra19     | 3.26 | Membrane-bound signaling molecule, receptor, defense/immunity protein                                                                   |
| Cluster 02 & 04 | 10548450 | Klra5                  | 4.17 | Membrane-bound signaling molecule, receptor, defense/immunity protein                                                                   |
| Cluster 02 & 04 | 10406982 | Adams6                 | 2.97 | Metalloprotease, extracellular matrix glycoprotein, serine protease inhibitor                                                           |
| Cluster 02 & 04 | 10398039 | Serpina3f/Serpina3g    | 2.07 | Misc.                                                                                                                                   |
| Cluster 02 & 04 | 10523923 | Ccdc18                 | 2.09 | Misc.                                                                                                                                   |
| Cluster 02 & 04 | 10461553 | A430093F15Rik          | 2.28 | Misc.                                                                                                                                   |
| Cluster 02 & 04 | 10446229 | Tnfsf9                 | 2.64 | Misc.                                                                                                                                   |
| Cluster 02 & 04 | 10447341 | Rhoq/Pigf              | 2.98 | Misc.                                                                                                                                   |
| Cluster 02 & 04 | 10502791 | Ifi44                  | 3.32 | Misc.                                                                                                                                   |
| Cluster 02 & 04 | 10558090 | Tacc2                  | 2.00 | Misc.                                                                                                                                   |
| Cluster 02 & 04 | 10548573 | Styk1                  | 2.84 | Non-receptor tyrosine protein kinase                                                                                                    |
| Cluster 02 & 04 | 10513145 | Ptpn3                  | 2.16 | Protein phosphatase                                                                                                                     |
| Cluster 02 & 04 | 10513164 | Ptpn3                  | 2.35 | Protein phosphatase                                                                                                                     |
| Cluster 02 & 04 | 10513166 | Ptpn3                  | 2.74 | Protein phosphatase                                                                                                                     |
| Cluster 02 & 04 | 10513162 | Ptpn3                  | 2.74 | Protein phosphatase                                                                                                                     |
| Cluster 02 & 04 | 10346790 | Ctla4 (CD152)          | 2.48 | Receptor                                                                                                                                |
| Cluster 02 & 04 | 10381809 | Itgb3 (CD61)           | 2.40 | Receptor, extracellular matrix glycoprotein, cell adhesion molecule                                                                     |
| Cluster 02 & 04 | 10511290 | Tnfrsf18               | 2.26 | Tumor necrosis factor receptor                                                                                                          |
| Cluster 02 & 04 | 10469278 | Il2ra (CD25)           | 5.32 | Type I cytokine receptor                                                                                                                |
| Cluster 02 & 05 | 10495405 | Slc25a24               | 3.50 | Amino acid transporter, mitochondrial carrier protein, transfer/carrier protein, ribosomal protein, calmodulin                          |
| Cluster 02 & 05 | 10606436 | Hmgn5                  | 2.22 | Chromatin/chromatin-binding protein                                                                                                     |
| Cluster 02 & 05 | 10419296 | Wdhd1                  | 2.12 | DNA binding protein                                                                                                                     |
| Cluster 02 & 05 | 10578690 | Neil3                  | 3.97 | DNA glycosylase, damaged DNA-binding protein, endodeoxyribonuclease, nuclease, lyase, esterase, glycosidase                             |
| Cluster 02 & 05 | 10546163 | Mcm2                   | 2.58 | DNA helicase, hydrolase                                                                                                                 |
| Cluster 02 & 05 | 10550102 | Lig1                   | 3.30 | DNA ligase                                                                                                                              |
| Cluster 02 & 05 | 10568050 | Aldoa/Aldoat1          | 2.40 | Fructose-bisphosphate aldolase                                                                                                          |
| Cluster 02 & 05 | 10587107 | Myo5a                  | 2.76 | G-protein coupled modulator, actin binding motor protein, cell junction protein                                                         |
| Cluster 02 & 05 | 10397645 | Gpr65                  | 2.10 | G-protein coupled receptor                                                                                                              |
| Cluster 02 & 05 | 10362294 | Arhgap18               | 2.06 | G-protein modulator                                                                                                                     |
| Cluster 02 & 05 | 10482059 | Ggta1                  | 2.84 | Glycosyltransferase                                                                                                                     |
| Cluster 02 & 05 | 10462973 | Hells (LSH)            | 3.74 | Helicase                                                                                                                                |
| Cluster 02 & 05 | 10511416 | Tox                    | 4.29 | HMG box transcription factor, signaling molecule, chromatin/chromatin-binding protein                                                   |
| Cluster 02 & 05 | 10491780 | Hspa41                 | 2.59 | Hsp70 family chaperone                                                                                                                  |
| Cluster 02 & 05 | 10472212 | Pkp4                   | 2.68 | Intermediate filament binding protein                                                                                                   |
| Cluster 02 & 05 | 10459481 | Lman1                  | 3.17 | Membrane traffic protein                                                                                                                |
| Cluster 02 & 05 | 10486396 | Ehd4                   | 4.27 | Membrane traffic protein, G-protein modulator, calcium-binding protein                                                                  |
| Cluster 02 & 05 | 10559261 | Cd81                   | 5.98 | Membrane-bound signaling molecule, receptor, cell adhesion molecule                                                                     |
| Cluster 02 & 05 | 10594251 | Kif23                  | 2.76 | Microtubule binding motor protein                                                                                                       |
| Cluster 02 & 05 | 10353733 | Prim2                  | 2.22 | Misc.                                                                                                                                   |
| Cluster 02 & 05 | 10580771 | Ciapin1                | 2.30 | Misc.                                                                                                                                   |
| Cluster 02 & 05 | 10400189 | 10400189               | 2.31 | Misc.                                                                                                                                   |
| Cluster 02 & 05 | 10361760 | Timm8a1                | 2.36 | Misc.                                                                                                                                   |
| Cluster 02 & 05 | 10606689 | Timm8a1                | 2.37 | Misc.                                                                                                                                   |
| Cluster 02 & 05 | 10474437 | Ccdc34                 | 2.45 | Misc.                                                                                                                                   |
| Cluster 02 & 05 | 10556640 | 6330503K22Rik (Ccp110) | 2.55 | Misc.                                                                                                                                   |
| Cluster 02 & 05 | 10548585 | Csda                   | 2.60 | Misc.                                                                                                                                   |
| Cluster 02 & 05 | 10544644 | Dfna5                  | 2.88 | Misc.                                                                                                                                   |
| Cluster 02 & 05 | 10479811 | Mcm10                  | 2.97 | Misc.                                                                                                                                   |
| Cluster 02 & 05 | 10365933 | Eea1                   | 3.07 | Misc.                                                                                                                                   |
| Cluster 02 & 05 | 10409990 | 6720489N17Rik          | 3.20 | Misc.                                                                                                                                   |
| Cluster 02 & 05 | 10503315 | Rad54b/Fsbp            | 3.28 | Misc.                                                                                                                                   |
| Cluster 02 & 05 | 10452709 | Ndc80                  | 3.35 | Misc.                                                                                                                                   |
| Cluster 02 & 05 | 10554325 | 5730590G19Rik          | 3.36 | Misc.                                                                                                                                   |
| Cluster 02 & 05 | 10455967 | 2610318N02Rik          | 3.44 | Misc.                                                                                                                                   |
| Cluster 02 & 05 | 10499035 | Mnd1/Gm3833            | 3.46 | Misc.                                                                                                                                   |

|                 |          |                    |       |                                                                     |
|-----------------|----------|--------------------|-------|---------------------------------------------------------------------|
| Cluster 02 & 05 | 10352756 | Lpgat1             | 3.80  | Misc.                                                               |
| Cluster 02 & 05 | 10483401 | Spe25              | 4.05  | Misc.                                                               |
| Cluster 02 & 05 | 10524169 | Pole               | 4.23  | Misc.                                                               |
| Cluster 02 & 05 | 10497520 | Ect2               | 5.18  | Misc.                                                               |
| Cluster 02 & 05 | 10408600 | Serpinb6a          | 6.27  | Misc.                                                               |
| Cluster 02 & 05 | 10424221 | Wdr67 (Tbc1d31)    | 3.15  | Misc.                                                               |
| Cluster 02 & 05 | 10466410 | Psat1/LOC100047252 | 4.62  | Misc.                                                               |
| Cluster 02 & 05 | 10412562 | Flnb               | 2.44  | Non-motor actin binding protein                                     |
| Cluster 02 & 05 | 10421877 | Diap3              | 4.90  | Non-motor actin binding protein                                     |
| Cluster 02 & 05 | 10473919 | Ckap5              | 2.21  | Non-motor microtubule binding protein                               |
| Cluster 02 & 05 | 10557459 | Mapk3              | 2.57  | Non-receptor serine/theronine protein kinase                        |
| Cluster 02 & 05 | 10452980 | Eif2ak2            | 2.70  | Non-receptor serine/theronine protein kinase                        |
| Cluster 02 & 05 | 10524790 | Cit                | 2.96  | Non-receptor serine/theronine protein kinase                        |
| Cluster 02 & 05 | 10588243 | Ryk                | 3.62  | NOT protein tyrosine kinase activity                                |
| Cluster 02 & 05 | 10582809 | Tk1                | 2.50  | Nucleotide kinase                                                   |
| Cluster 02 & 05 | 10538253 | Mpp6               | 3.02  | Nucleotide kinase, cell junction protein                            |
| Cluster 02 & 05 | 10371888 | Tmpo               | 2.05  | Peptide hormone                                                     |
| Cluster 02 & 05 | 10578703 | Spcs3              | 2.51  | Protease                                                            |
| Cluster 02 & 05 | 10458195 | Cdc25c             | 4.13  | Protein phosphatase                                                 |
| Cluster 02 & 05 | 10439895 | Alcam (CD166)      | 2.68  | Receptor, immunoglobulin superfamily cell adhesion molecule         |
| Cluster 02 & 05 | 10428672 | Dscc1              | 4.00  | Replication origin binding protein                                  |
| Cluster 02 & 05 | 10438378 | Cdc45              | 4.26  | Replication origin binding protein                                  |
| Cluster 02 & 05 | 10601854 | Wbp5               | 2.41  | Transcription factor                                                |
| Cluster 02 & 05 | 10408477 | E2f3               | 2.16  | Transcription factor, nucleic acid binding                          |
| Cluster 02 & 05 | 10570373 | Tfdp1              | 2.35  | Transcription factor, nucleic acid binding                          |
| Cluster 02 & 05 | 10355246 | Acadl              | 2.67  | Transferase dehydrogenase oxidase                                   |
| Cluster 02 & 05 | 10592058 | Tuba1b             | 2.06  | Tubulin                                                             |
| Cluster 02 & 05 | 10581800 | Rfwd3              | 2.04  | Ubiquitin-protein ligase                                            |
| Cluster 02 & 05 | 10568461 | Rfwd3              | 2.08  | Ubiquitin-protein ligase                                            |
| Cluster 02 & 05 | 10428534 | Trps1              | 3.70  | Zinc finger transcription factor, nuclease                          |
| Cluster 02 & 06 | 10468992 | Frmk4a             | 3.25  | Actin family cytoskeletal protein                                   |
| Cluster 02 & 06 | 10379535 | Ccl8               | 10.85 | Chemokine                                                           |
| Cluster 02 & 06 | 10515744 | Cdc20              | 2.79  | Enzyme modulator                                                    |
| Cluster 02 & 06 | 10436169 | Ift57              | 2.34  | Enzyme modulator, cytoskeletal protein                              |
| Cluster 02 & 06 | 10445293 | Pla2g7             | 4.98  | Esterase                                                            |
| Cluster 02 & 06 | 10449000 | Msln               | 3.12  | Extracellular matrix glycoprotein                                   |
| Cluster 02 & 06 | 10597413 | Crtap              | 2.84  | Extracellular matrix protein                                        |
| Cluster 02 & 06 | 10460108 | Gnpat1             | 2.40  | Glucosamine 6-phosphate N-acetyltransferase                         |
| Cluster 02 & 06 | 10547807 | Eno2               | 2.64  | Lyase                                                               |
| Cluster 02 & 06 | 10548030 | Cd9                | 4.32  | Membrane-bound signaling molecule, receptor, cell adhesion molecule |
| Cluster 02 & 06 | 10474381 | Kif18a             | 2.71  | Microtubule binding motor protein                                   |
| Cluster 02 & 06 | 10548422 | Klri2              | 5.84  | Microtubule binding motor protein                                   |
| Cluster 02 & 06 | 10515943 | Ctps               | 2.36  | Misc.                                                               |
| Cluster 02 & 06 | 10600797 | Apoo/Apoo-ps       | 2.40  | Misc.                                                               |
| Cluster 02 & 06 | 10381445 | Tmem106a           | 2.51  | Misc.                                                               |
| Cluster 02 & 06 | 10429387 | Ptplb (Hacd2)      | 2.51  | Misc.                                                               |
| Cluster 02 & 06 | 10365716 | Ikbip/LOC100862563 | 2.52  | Misc.                                                               |
| Cluster 02 & 06 | 10453715 | Rab18              | 2.54  | Misc.                                                               |
| Cluster 02 & 06 | 10383479 | Hmga1/Hmga1-rs1    | 2.58  | Misc.                                                               |
| Cluster 02 & 06 | 10582241 | Zcchc14            | 2.61  | Misc.                                                               |
| Cluster 02 & 06 | 10394735 | Pdia6              | 2.62  | Misc.                                                               |
| Cluster 02 & 06 | 10499366 | Pmf1               | 2.65  | Misc.                                                               |
| Cluster 02 & 06 | 10523529 | Cops4              | 2.67  | Misc.                                                               |
| Cluster 02 & 06 | 10582020 | Gesh               | 2.75  | Misc.                                                               |
| Cluster 02 & 06 | 10412036 | Apoo/Apoo-ps       | 2.75  | Misc.                                                               |
| Cluster 02 & 06 | 10443009 | Ergic1             | 3.02  | Misc.                                                               |
| Cluster 02 & 06 | 10538269 | Dfna5              | 3.02  | Misc.                                                               |
| Cluster 02 & 06 | 10455873 | Slc12a2            | 3.03  | Misc.                                                               |
| Cluster 02 & 06 | 10602068 | Mid2               | 3.27  | Misc.                                                               |
| Cluster 02 & 06 | 10506680 | Tmem48 (Ndc1)      | 3.38  | Misc.                                                               |
| Cluster 02 & 06 | 10381588 | Gm                 | 4.37  | Misc.                                                               |
| Cluster 02 & 06 | 10498584 | Rarres1            | 4.39  | Misc.                                                               |
| Cluster 02 & 06 | 10494445 | Lix1l              | 4.43  | Misc.                                                               |
| Cluster 02 & 06 | 10430358 | C1qtnf6            | 4.48  | Misc.                                                               |
| Cluster 02 & 06 | 10487011 | Gatm               | 6.36  | Misc.                                                               |
| Cluster 02 & 06 | 10379727 | Gm11428            | 7.76  | Misc.                                                               |
| Cluster 02 & 06 | 10403821 | 10403821           | 18.40 | Misc.                                                               |
| Cluster 02 & 06 | 10407940 | Trgv2              | 26.65 | Misc.                                                               |

|                 |          |                              |       |                                                                                                                                                                                                                   |
|-----------------|----------|------------------------------|-------|-------------------------------------------------------------------------------------------------------------------------------------------------------------------------------------------------------------------|
| Cluster 02 & 06 | 10605437 | Pls3                         | 3.73  | Non-motor actin binding protein                                                                                                                                                                                   |
| Cluster 02 & 06 | 10523468 | Bmp2k                        | 2.52  | Non-receptor serine/threonine protein kinase                                                                                                                                                                      |
| Cluster 02 & 06 | 10430255 | Foxred2                      | 4.83  | Oxygenase                                                                                                                                                                                                         |
| Cluster 02 & 06 | 10521709 | Lap3                         | 3.02  | Peptidase                                                                                                                                                                                                         |
| Cluster 02 & 06 | 10526520 | Plod3/Znhit1                 | 2.56  | Procollagen glucosyltransferase activity, procollagen-lysine 5-dioxygenase activity                                                                                                                               |
| Cluster 02 & 06 | 10605711 | Pdk3                         | 2.39  | Protein kinase                                                                                                                                                                                                    |
| Cluster 02 & 06 | 10592515 | Ubash3b                      | 2.83  | Protein tyrosine phosphatase activity                                                                                                                                                                             |
| Cluster 02 & 06 | 10363498 | Ppa1                         | 2.77  | Pyrophosphatase                                                                                                                                                                                                   |
| Cluster 02 & 06 | 10544596 | Tmem176b                     | 5.69  | Receptor                                                                                                                                                                                                          |
| Cluster 02 & 06 | 10587554 | Tpbg                         | 4.84  | Receptor, extracellular matrix protein                                                                                                                                                                            |
| Cluster 02 & 06 | 10541034 | Zfand4                       | 2.72  | Ribosomal protein                                                                                                                                                                                                 |
| Cluster 02 & 06 | 10423654 | Osr2                         | 2.79  | RNA polymerase II regulatory region sequence-specific DNA binding, sequence-specific DNA binding, transcriptional activator activity, RNA polymerase II transcription regulatory region sequence-specific binding |
| Cluster 02 & 06 | 10431424 | Plxnb2                       | 2.91  | Semaphorin receptor activity                                                                                                                                                                                      |
| Cluster 02 & 06 | 10420280 | Gzmg                         | 9.91  | Serine protease                                                                                                                                                                                                   |
| Cluster 02 & 06 | 10420268 | Gzmd/Gzme                    | 31.46 | Serine protease                                                                                                                                                                                                   |
| Cluster 02 & 06 | 10550650 | Ercc1/Cd3eap                 | 2.55  | TFIID-class transcription factor binding                                                                                                                                                                          |
| Cluster 02 & 06 | 10361007 | Smyd2                        | 2.86  | Transcription factor                                                                                                                                                                                              |
| Cluster 02 & 06 | 10373313 | Nab2                         | 2.51  | Transcription factor binding                                                                                                                                                                                      |
| Cluster 02 & 06 | 10406934 | Etv1                         | 3.79  | Transcription factor, signaling molecule, nucleic acid binding                                                                                                                                                    |
| Cluster 02 & 06 | 10547100 | Plxnd1                       | 3.63  | Tyrosine protein kinase receptor, signaling molecule, protein kinase                                                                                                                                              |
| Cluster 02 & 07 | 10464128 | Casp7                        | 2.04  | Cysteine protease, protease inhibitor                                                                                                                                                                             |
| Cluster 02 & 07 | 10353420 | Mem3                         | 2.92  | DNA helicase, hydrolase                                                                                                                                                                                           |
| Cluster 02 & 07 | 10390707 | Top2a                        | 5.43  | DNA topoisomerase, isomerase, enzyme modulator                                                                                                                                                                    |
| Cluster 02 & 07 | 10542079 | Foxm1/4933413G19Rik          | 4.56  | DNA-binding protein                                                                                                                                                                                               |
| Cluster 02 & 07 | 10501699 | Agl                          | 2.66  | Glycosyltransferase, glycosidase                                                                                                                                                                                  |
| Cluster 02 & 07 | 10587023 | Rab27a                       | 2.15  | GTP binding, GTPase activity                                                                                                                                                                                      |
| Cluster 02 & 07 | 10562637 | Ccnb1/Gm5593                 | 4.44  | Kinase                                                                                                                                                                                                            |
| Cluster 02 & 07 | 10515836 | Ccnb1/Gm5593                 | 4.62  | Kinase                                                                                                                                                                                                            |
| Cluster 02 & 07 | 10411739 | Ccnb1/Gm5593                 | 4.67  | Kinase                                                                                                                                                                                                            |
| Cluster 02 & 07 | 10543067 | Asns                         | 5.26  | Ligase                                                                                                                                                                                                            |
| Cluster 02 & 07 | 10474984 | Nusap1/Oip5                  | 4.85  | Microtubule binding                                                                                                                                                                                               |
| Cluster 02 & 07 | 10350297 | Kif14                        | 3.11  | Microtubule binding motor protein                                                                                                                                                                                 |
| Cluster 02 & 07 | 10462632 | Kif20b                       | 3.15  | Microtubule binding motor protein                                                                                                                                                                                 |
| Cluster 02 & 07 | 10568150 | Kif22                        | 3.67  | Microtubule binding motor protein                                                                                                                                                                                 |
| Cluster 02 & 07 | 10391811 | Kif18b                       | 3.81  | Microtubule binding motor protein                                                                                                                                                                                 |
| Cluster 02 & 07 | 10515431 | Kif2c                        | 5.20  | Microtubule binding motor protein                                                                                                                                                                                 |
| Cluster 02 & 07 | 10496204 | Cenpe                        | 5.94  | Microtubule binding motor protein                                                                                                                                                                                 |
| Cluster 02 & 07 | 10590494 | Kif15                        | 8.33  | Microtubule binding motor protein                                                                                                                                                                                 |
| Cluster 02 & 07 | 10561706 | 2200002D01Rik (H2RSP) /Yif1b | 2.02  | Misc.                                                                                                                                                                                                             |
| Cluster 02 & 07 | 10389134 | Slfn9                        | 2.03  | Misc.                                                                                                                                                                                                             |
| Cluster 02 & 07 | 10355115 | Prelid1                      | 2.14  | Misc.                                                                                                                                                                                                             |
| Cluster 02 & 07 | 10402650 | Cinp/LOC640972               | 2.18  | Misc.                                                                                                                                                                                                             |
| Cluster 02 & 07 | 10457729 | Dsc1/Tpi1                    | 2.21  | Misc.                                                                                                                                                                                                             |
| Cluster 02 & 07 | 10489078 | Dsn1                         | 2.21  | Misc.                                                                                                                                                                                                             |
| Cluster 02 & 07 | 10430825 | Cenpm                        | 2.30  | Misc.                                                                                                                                                                                                             |
| Cluster 02 & 07 | 10511617 | Fam92a                       | 2.44  | Misc.                                                                                                                                                                                                             |
| Cluster 02 & 07 | 10484425 | 2700094K13Rik                | 2.59  | Misc.                                                                                                                                                                                                             |
| Cluster 02 & 07 | 10426098 | Creld2                       | 2.60  | Misc.                                                                                                                                                                                                             |
| Cluster 02 & 07 | 10426016 | Gtse1                        | 2.63  | Misc.                                                                                                                                                                                                             |
| Cluster 02 & 07 | 10593483 | Fdx1                         | 2.68  | Misc.                                                                                                                                                                                                             |
| Cluster 02 & 07 | 10367282 | Cnpy2                        | 2.68  | Misc.                                                                                                                                                                                                             |
| Cluster 02 & 07 | 10548699 | 10548699                     | 2.96  | Misc.                                                                                                                                                                                                             |
| Cluster 02 & 07 | 10355327 | Bard1                        | 2.98  | Misc.                                                                                                                                                                                                             |
| Cluster 02 & 07 | 10538832 | Mad2l1/LOC100045924          | 3.27  | Misc.                                                                                                                                                                                                             |
| Cluster 02 & 07 | 10406968 | Cenpk/Ppwd1                  | 3.81  | Misc.                                                                                                                                                                                                             |
| Cluster 02 & 07 | 10446027 | Chaf1a/Ubxn6                 | 3.83  | Misc.                                                                                                                                                                                                             |
| Cluster 02 & 07 | 10379127 | Spag5                        | 4.25  | Misc.                                                                                                                                                                                                             |
| Cluster 02 & 07 | 10541729 | Cdca3                        | 4.40  | Misc.                                                                                                                                                                                                             |
| Cluster 02 & 07 | 10400589 | Mis18bp1                     | 4.49  | Misc.                                                                                                                                                                                                             |
| Cluster 02 & 07 | 10507112 | Stil                         | 4.64  | Misc.                                                                                                                                                                                                             |
| Cluster 02 & 07 | 10591556 | Spe24                        | 4.69  | Misc.                                                                                                                                                                                                             |
| Cluster 02 & 07 | 10577508 | Ckap2                        | 5.17  | Misc.                                                                                                                                                                                                             |
| Cluster 02 & 07 | 10487340 | Ncaph                        | 5.41  | Misc.                                                                                                                                                                                                             |
| Cluster 02 & 07 | 10501229 | Gstm1                        | 5.52  | Misc.                                                                                                                                                                                                             |



|                 |          |                                                                                                               |       |                                                                                                                                           |
|-----------------|----------|---------------------------------------------------------------------------------------------------------------|-------|-------------------------------------------------------------------------------------------------------------------------------------------|
| Cluster 02 & 07 | 10474875 | Case5                                                                                                         | 5.57  | Misc.                                                                                                                                     |
| Cluster 02 & 07 | 10521731 | Ncapg                                                                                                         | 5.93  | Misc.                                                                                                                                     |
| Cluster 02 & 07 | 10399087 | Ncapg2                                                                                                        | 6.11  | Misc.                                                                                                                                     |
| Cluster 02 & 07 | 10474769 | Bub1b                                                                                                         | 6.58  | Misc.                                                                                                                                     |
| Cluster 02 & 07 | 10350838 | 2810417H13Rik                                                                                                 | 6.70  | Misc.                                                                                                                                     |
| Cluster 02 & 07 | 10385248 | Hmmr                                                                                                          | 6.76  | Misc.                                                                                                                                     |
| Cluster 02 & 07 | 10411728 | Cenph                                                                                                         | 6.77  | Misc.                                                                                                                                     |
| Cluster 02 & 07 | 10487480 | Bub1                                                                                                          | 10.75 | Misc.                                                                                                                                     |
| Cluster 02 & 07 | 10353032 | Vcpip1                                                                                                        | 2.20  | Misc.                                                                                                                                     |
| Cluster 02 & 07 | 10528915 | Tyms/Tyms-ps                                                                                                  | 2.97  | Misc.                                                                                                                                     |
| Cluster 02 & 07 | 10459755 | Ska1                                                                                                          | 3.12  | Misc.                                                                                                                                     |
| Cluster 02 & 07 | 10451805 | Sgol1                                                                                                         | 3.38  | Misc.                                                                                                                                     |
| Cluster 02 & 07 | 10521090 | Tacc3                                                                                                         | 4.24  | Misc.                                                                                                                                     |
| Cluster 02 & 07 | 10346365 | Sgol2                                                                                                         | 5.25  | Misc.                                                                                                                                     |
| Cluster 02 & 07 | 10554445 | Prc1                                                                                                          | 3.57  | Non-motor actin binding protein                                                                                                           |
| Cluster 02 & 07 | 10350392 | Aspm                                                                                                          | 4.89  | Non-motor actin binding protein                                                                                                           |
| Cluster 02 & 07 | 10477187 | Tpx2                                                                                                          | 6.58  | Non-motor microtubule binding protein                                                                                                     |
| Cluster 02 & 07 | 10561854 | Tbcb                                                                                                          | 2.62  | Non-motor microtubule binding protein, chaperone                                                                                          |
| Cluster 02 & 07 | 10490104 | Aurka                                                                                                         | 2.55  | Non-receptor serine/theronine protein kinase                                                                                              |
| Cluster 02 & 07 | 10504470 | Melk                                                                                                          | 3.61  | Non-receptor serine/theronine protein kinase                                                                                              |
| Cluster 02 & 07 | 10377405 | Aurkb                                                                                                         | 5.33  | Non-receptor serine/theronine protein kinase                                                                                              |
| Cluster 02 & 07 | 10581813 | Mkl1                                                                                                          | 4.33  | Non-receptor serine/theronine protein kinase, non-receptor tyrosine protein kinase                                                        |
| Cluster 02 & 07 | 10369815 | Cdk1                                                                                                          | 4.83  | Non-receptor serine/theronine protein kinase, non-receptor tyrosine protein kinase                                                        |
| Cluster 02 & 07 | 10356859 | Dtymk                                                                                                         | 2.08  | Nucleotide kinase                                                                                                                         |
| Cluster 02 & 07 | 10533090 | Rfc5                                                                                                          | 2.27  | Nucleotidyltransferase, DNA-directed DNA polymerase                                                                                       |
| Cluster 02 & 07 | 10571399 | Zdhhc2                                                                                                        | 4.51  | Palmitoyltransferase activity                                                                                                             |
| Cluster 02 & 07 | 10607475 | Prdx4                                                                                                         | 4.59  | Peroxidase                                                                                                                                |
| Cluster 02 & 07 | 10516956 | Smpd13b                                                                                                       | 2.01  | Phosphodiesterase                                                                                                                         |
| Cluster 02 & 07 | 10453214 | Nutf2/Nutf2-ps1                                                                                               | 2.66  | Protein transporter activity                                                                                                              |
| Cluster 02 & 07 | 10457463 | Nutf2/Nutf2-ps1                                                                                               | 2.71  | Protein transporter activity                                                                                                              |
| Cluster 02 & 07 | 10468531 | Nutf2/Nutf2-ps1                                                                                               | 2.71  | Protein transporter activity                                                                                                              |
| Cluster 02 & 07 | 10428690 | Mrpl13                                                                                                        | 2.14  | Ribosomal protein                                                                                                                         |
| Cluster 02 & 07 | 10346651 | Bmpr2                                                                                                         | 2.39  | Serine/theronine protein kinase, TGF-beta receptor, protein kinase                                                                        |
| Cluster 02 & 07 | 10576883 | Shebp1                                                                                                        | 6.49  | SH2 domain binding                                                                                                                        |
| Cluster 02 & 07 | 10493812 | S100a4                                                                                                        | 2.17  | Signaling molecule, calmodulin                                                                                                            |
| Cluster 02 & 07 | 10550509 | Pglyrp1                                                                                                       | 2.46  | Signaling molecule, defense/immunity protein                                                                                              |
| Cluster 02 & 07 | 10369252 | Sept10                                                                                                        | 2.51  | Small GTPase, cytoskeletal protein                                                                                                        |
| Cluster 02 & 07 | 10359890 | Nuf2                                                                                                          | 8.21  | Structural protein                                                                                                                        |
| Cluster 02 & 07 | 10363901 | Etv5                                                                                                          | 2.44  | Transcription factor, signaling molecule, nucleic acid binding                                                                            |
| Cluster 02 & 07 | 10392284 | Kpna2                                                                                                         | 2.88  | Transfer/carrier protein                                                                                                                  |
| Cluster 02 & 07 | 10453512 | Kpna2                                                                                                         | 2.92  | Transfer/carrier protein                                                                                                                  |
| Cluster 02 & 07 | 10497503 | Kpna2                                                                                                         | 3.12  | Transfer/carrier protein                                                                                                                  |
| Cluster 02 & 07 | 10595664 | Tmed3                                                                                                         | 2.31  | Transfer/carrier protein, vesicle coat protein                                                                                            |
| Cluster 02 & 07 | 10469035 | Sephs1                                                                                                        | 2.40  | Transferase                                                                                                                               |
| Cluster 02 & 07 | 10419323 | Dlgap5                                                                                                        | 4.06  | Ttransmembrane receptor regulatory/adaptor protein                                                                                        |
| Cluster 02 & 07 | 10534660 | Ap1s1                                                                                                         | 2.62  | Vesicle coat protein                                                                                                                      |
| Cluster 02 & 08 | 10472782 | Hat1                                                                                                          | 2.21  | Acetyltransferase                                                                                                                         |
| Cluster 02 & 08 | 10551614 | Ech1                                                                                                          | 2.39  | Acetyltransferase, acyltransferase, dehydrogenase, hydratase, ligase, epimerase/racemase                                                  |
| Cluster 02 & 08 | 10594911 | Tex9                                                                                                          | 2.55  | Actin binding motor protein                                                                                                               |
| Cluster 02 & 08 | 10363475 | Prfl                                                                                                          | 3.42  | Apolipoprotein, receptor, metalloprotease, serine protease, metalloprotease, serine protease, complement component cell adhesion molecule |
| Cluster 02 & 08 | 10497894 | Cetn4                                                                                                         | 2.15  | Calcium ion binding, heterotrimeric G-protein binding                                                                                     |
| Cluster 02 & 08 | 10601390 | Pgk1                                                                                                          | 3.80  | Carbohydrate kinase                                                                                                                       |
| Cluster 02 & 08 | 10399379 | Pgk1                                                                                                          | 3.83  | Carbohydrate kinase                                                                                                                       |
| Cluster 02 & 08 | 10498313 | Pgk1                                                                                                          | 3.83  | Carbohydrate kinase                                                                                                                       |
| Cluster 02 & 08 | 10399391 | Gen1                                                                                                          | 3.37  | Damaged DNA-binding protein, endodeoxyribonuclease                                                                                        |
| Cluster 02 & 08 | 10562044 | Zbtb32 (PLZP)                                                                                                 | 8.95  | DNA binding, transcription corepressor activity, zinc ion binding                                                                         |
| Cluster 02 & 08 | 10357436 | Mcm6                                                                                                          | 2.66  | DNA helicase, hydrolase                                                                                                                   |
| Cluster 02 & 08 | 10483249 | Galnt3                                                                                                        | 7.43  | Glycosyltransferase                                                                                                                       |
| Cluster 02 & 08 | 10408083 | Hist1h3i/Hist1h3a/Hist1h3h/Hist1h3g/Hist1h3d/Hist2h3b/Hist1h3e/Hist1h3b/Hist1h3c/Hist1h3f/Hist2h3c2/Hist2h3c1 | 2.23  | Histone                                                                                                                                   |
| Cluster 02 & 08 | 10408202 | Hist1h3e/Hist2h3b/Hist1h3b/Hist1h3d/Hist1h3c/Hist1h3f/Hist2h3c2/Hist2h3c1/Hist1h3h/Hist1h3a/Hist1h3i/Hist1h3g | 2.26  | Histone                                                                                                                                   |

|                 |          |                                                                            |      |                                                                                                                     |
|-----------------|----------|----------------------------------------------------------------------------|------|---------------------------------------------------------------------------------------------------------------------|
| Cluster 02 & 08 | 10403943 | Hist1h2bm                                                                  | 2.39 | Histone                                                                                                             |
| Cluster 02 & 08 | 10494405 | Hist2h3b/Hist1h3e/Hist1h3b/Hist1h3d/Hist1h3c/Hist1h3f/Hist2h3c2/ Hist2h3c1 | 2.50 | Histone                                                                                                             |
| Cluster 02 & 08 | 10494402 | Hist2h3c1/Hist2h3b/Hist1h3e/Hist1h3b/Hist1h3d/Hist1h3c/Hist1h3f/ Hist2h3c2 | 2.53 | Histone                                                                                                             |
| Cluster 02 & 08 | 10408081 | Hist1h1b                                                                   | 3.12 | Histone                                                                                                             |
| Cluster 02 & 08 | 10406663 | Arsb                                                                       | 5.87 | Hydrolase                                                                                                           |
| Cluster 02 & 08 | 10406672 | Arsb                                                                       | 6.27 | Hydrolase                                                                                                           |
| Cluster 02 & 08 | 10554863 | Sytl2                                                                      | 2.45 | Membrane trafficking regulatory protein                                                                             |
| Cluster 02 & 08 | 10400383 | 2700097O09Rik                                                              | 3.15 | Methyltransferase                                                                                                   |
| Cluster 02 & 08 | 10603431 | Suv39h1                                                                    | 2.28 | Methyltransferase, DNA binding protein                                                                              |
| Cluster 02 & 08 | 10521136 | Whsc1                                                                      | 2.86 | Methyltransferase, DNA binding protein                                                                              |
| Cluster 02 & 08 | 10462796 | Kif11                                                                      | 5.81 | Microtubule binding motor protein                                                                                   |
| Cluster 02 & 08 | 10601011 | Kif4/Pdzd11                                                                | 6.15 | Microtubule binding motor protein                                                                                   |
| Cluster 02 & 08 | 10603567 | Dynlt3                                                                     | 3.38 | Microtubule family cytoskeletal protein                                                                             |
| Cluster 02 & 08 | 10424676 | Ly6e (Sca-2)                                                               | 2.08 | Misc.                                                                                                               |
| Cluster 02 & 08 | 10543319 | Fam3c                                                                      | 2.12 | Misc.                                                                                                               |
| Cluster 02 & 08 | 10405427 | Prelid1/Rab24                                                              | 2.14 | Misc.                                                                                                               |
| Cluster 02 & 08 | 10377605 | 1810027O10Rik                                                              | 2.16 | Misc.                                                                                                               |
| Cluster 02 & 08 | 10582190 | Gins2/Gse1                                                                 | 2.29 | Misc.                                                                                                               |
| Cluster 02 & 08 | 10462136 | Cycs                                                                       | 2.33 | Misc.                                                                                                               |
| Cluster 02 & 08 | 10528170 | Cycs                                                                       | 2.42 | Misc.                                                                                                               |
| Cluster 02 & 08 | 10601473 | Apool                                                                      | 2.47 | Misc.                                                                                                               |
| Cluster 02 & 08 | 10532944 | Mlec                                                                       | 2.52 | Misc.                                                                                                               |
| Cluster 02 & 08 | 10544660 | Osbpl3                                                                     | 2.60 | Misc.                                                                                                               |
| Cluster 02 & 08 | 10532954 | Mlec                                                                       | 2.81 | Misc.                                                                                                               |
| Cluster 02 & 08 | 10568217 | Dctpp1                                                                     | 2.84 | Misc.                                                                                                               |
| Cluster 02 & 08 | 10355050 | Raph1                                                                      | 2.92 | Misc.                                                                                                               |
| Cluster 02 & 08 | 10573451 | Syce2                                                                      | 2.94 | Misc.                                                                                                               |
| Cluster 02 & 08 | 10495945 | 4930422G04Rik                                                              | 3.04 | Misc.                                                                                                               |
| Cluster 02 & 08 | 10508986 | Stmn1                                                                      | 3.11 | Misc.                                                                                                               |
| Cluster 02 & 08 | 10378053 | Fam64a                                                                     | 3.21 | Misc.                                                                                                               |
| Cluster 02 & 08 | 10426669 | Troap                                                                      | 3.22 | Misc.                                                                                                               |
| Cluster 02 & 08 | 10513818 | Stmn1                                                                      | 3.26 | Misc.                                                                                                               |
| Cluster 02 & 08 | 10590909 | Endod1                                                                     | 3.36 | Misc.                                                                                                               |
| Cluster 02 & 08 | 10429564 | Ly6a (TAP, Sca-1)                                                          | 3.45 | Misc.                                                                                                               |
| Cluster 02 & 08 | 10409190 | Cenpp                                                                      | 3.81 | Misc.                                                                                                               |
| Cluster 02 & 08 | 10508151 | Clspn                                                                      | 3.94 | Misc.                                                                                                               |
| Cluster 02 & 08 | 10568714 | Mki67 (Ki67)                                                               | 4.18 | Misc.                                                                                                               |
| Cluster 02 & 08 | 10420426 | F630043A04Rik                                                              | 4.87 | Misc.                                                                                                               |
| Cluster 02 & 08 | 10410560 | Trip13                                                                     | 5.04 | Misc.                                                                                                               |
| Cluster 02 & 08 | 10411359 | Plp2/Prickle3                                                              | 5.10 | Misc.                                                                                                               |
| Cluster 02 & 08 | 10525591 | Kntc1                                                                      | 5.13 | Misc.                                                                                                               |
| Cluster 02 & 08 | 10473022 | Plp2                                                                       | 5.39 | Misc.                                                                                                               |
| Cluster 02 & 08 | 10485674 | 2700007P21Rik                                                              | 5.77 | Misc.                                                                                                               |
| Cluster 02 & 08 | 10499639 | Cks1b/Gm6340                                                               | 5.90 | Misc.                                                                                                               |
| Cluster 02 & 08 | 10516246 | Cdca8                                                                      | 6.11 | Misc.                                                                                                               |
| Cluster 02 & 08 | 10475517 | AA467197/Mir147                                                            | 6.92 | Misc.                                                                                                               |
| Cluster 02 & 08 | 10389606 | Prr11                                                                      | 7.39 | Misc.                                                                                                               |
| Cluster 02 & 08 | 10462866 | Cep55                                                                      | 7.55 | Misc.                                                                                                               |
| Cluster 02 & 08 | 10534456 | Hip1                                                                       | 2.58 | Non-motor actin binding protein                                                                                     |
| Cluster 02 & 08 | 10427166 | Esp11                                                                      | 2.87 | Nucleic acid binding                                                                                                |
| Cluster 02 & 08 | 10547943 | Ncapd2                                                                     | 2.89 | Nucleic acid binding                                                                                                |
| Cluster 02 & 08 | 10373515 | Suox                                                                       | 3.21 | Oxidase                                                                                                             |
| Cluster 02 & 08 | 10475610 | Dut                                                                        | 2.81 | Phosphatase                                                                                                         |
| Cluster 02 & 08 | 10367076 | Prim1                                                                      | 4.46 | Primase                                                                                                             |
| Cluster 02 & 08 | 10382998 | Birc5                                                                      | 5.00 | Protease inhibitor                                                                                                  |
| Cluster 02 & 08 | 10394978 | Rrm2                                                                       | 4.69 | Reductase                                                                                                           |
| Cluster 02 & 08 | 10455595 | Eno1/Gm5506                                                                | 2.71 | RNA binding, phosphopyruvate hydratase activity                                                                     |
| Cluster 02 & 08 | 10473240 | Eno1/Gm5506                                                                | 2.75 | RNA binding, phosphopyruvate hydratase activity                                                                     |
| Cluster 02 & 08 | 10584435 | Vwa5a                                                                      | 2.51 | Serine protease inhibitor                                                                                           |
| Cluster 02 & 08 | 10519983 | Fgl2                                                                       | 6.67 | Signaling molecule                                                                                                  |
| Cluster 02 & 08 | 10433088 | Cbx5                                                                       | 3.23 | Transcription factor, chromatin/chromatin-binding protein                                                           |
| Cluster 02 & 08 | 10366277 | E2f7                                                                       | 2.12 | Transcription factor, nucleic acid binding                                                                          |
| Cluster 02 & 08 | 10587792 | Plscr1                                                                     | 4.82 | Transfer/carrier protein                                                                                            |
| Cluster 02 & 08 | 10517336 | Clic4                                                                      | 3.35 | Transferase, signaling molecule, reductase, translation elongation factor, epimerase/racemase, cytoskeletal protein |



|                 |          |                    |       |                                                                                               |
|-----------------|----------|--------------------|-------|-----------------------------------------------------------------------------------------------|
| Cluster 02 & 08 | 10354389 | Slc39a10           | 2.81  | Transporter                                                                                   |
| Cluster 02 & 08 | 10491091 | Tnfsf10            | 2.96  | Tumor necrosis factor receptor                                                                |
| Cluster 02 & 08 | 10446074 | Uhrf1              | 3.87  | Ubiquitin-protein ligase                                                                      |
| Cluster 02 & 08 | 10355967 | Ap1s3              | 2.39  | Vesicle coat protein                                                                          |
| Cluster 02 & 09 | 10428857 | Mtss1              | 2.04  | Actin family cytoskeletal protein                                                             |
| Cluster 02 & 09 | 10534303 | Lat2               | 7.88  | Amino acid transporter                                                                        |
| Cluster 02 & 09 | 10552697 | Napsa              | 3.59  | Aspartic protease                                                                             |
| Cluster 02 & 09 | 10592330 | Nrgn               | 13.60 | calmodulin binding                                                                            |
| Cluster 02 & 09 | 10553501 | Slc17a6            | 11.02 | Cation transporter                                                                            |
| Cluster 02 & 09 | 10573261 | Asf1b              | 3.27  | Chromatin/chromatin-binding protein                                                           |
| Cluster 02 & 09 | 10385325 | Pttg1              | 2.14  | Cysteine-type endopeptidase inhibitor activity                                                |
| Cluster 02 & 09 | 10527801 | Brca2              | 2.34  | Damaged DNA-binding protein                                                                   |
| Cluster 02 & 09 | 10352048 | Exo1               | 2.79  | Damaged DNA-binding protein, endodeoxyribonuclease, exodeoxyribonuclease, nuclease, hydrolase |
| Cluster 02 & 09 | 10463064 | Gapdh              | 2.09  | Dehydrogenase                                                                                 |
| Cluster 02 & 09 | 10368612 | Gapdh              | 2.15  | Dehydrogenase                                                                                 |
| Cluster 02 & 09 | 10474239 | Gapdh              | 2.16  | Dehydrogenase                                                                                 |
| Cluster 02 & 09 | 10425903 | Gapdh              | 2.30  | Dehydrogenase                                                                                 |
| Cluster 02 & 09 | 10553301 | Ldha               | 2.67  | Dehydrogenase                                                                                 |
| Cluster 02 & 09 | 10472162 | Gpd2               | 6.49  | Dehydrogenase                                                                                 |
| Cluster 02 & 09 | 10452815 | Xdh                | 4.71  | Dehydrogenase, oxidase                                                                        |
| Cluster 02 & 09 | 10574427 | Impdh2             | 2.54  | Dehydrogenase, reductase                                                                      |
| Cluster 02 & 09 | 10485294 | Hsd17b12           | 3.70  | Dehydrogenase, reductase                                                                      |
| Cluster 02 & 09 | 10572906 | Mcm5               | 3.01  | DNA helicase, hydrolase                                                                       |
| Cluster 02 & 09 | 10474902 | Rad51              | 7.39  | DNA strand-pairing protein, hydrolase                                                         |
| Cluster 02 & 09 | 10379363 | Atad5              | 2.97  | DNA-binding protein                                                                           |
| Cluster 02 & 09 | 10435581 | Polq               | 2.26  | DNA-directed DNA polymerase activity                                                          |
| Cluster 02 & 09 | 10605674 | Pola1              | 2.66  | Exodeoxyribonuclease, nuclease                                                                |
| Cluster 02 & 09 | 10523717 | Spp1               | 87.69 | Extracellular matrix binding                                                                  |
| Cluster 02 & 09 | 10423293 | Myo10              | 10.78 | G-protein coupled modulator, actin binding motor protein, cell junction protein               |
| Cluster 02 & 09 | 10407985 | Gpr141             | 2.63  | G-protein coupled receptor                                                                    |
| Cluster 02 & 09 | 10546853 | Srgap3             | 9.23  | G-protein modulator                                                                           |
| Cluster 02 & 09 | 10546855 | Srgap3             | 10.24 | G-protein modulator                                                                           |
| Cluster 02 & 09 | 10408225 | Hist1h4c           | 2.32  | Histone                                                                                       |
| Cluster 02 & 09 | 10547830 | Tpi1               | 7.60  | Isomerase                                                                                     |
| Cluster 02 & 09 | 10509441 | Ece1               | 2.35  | Metalloprotease                                                                               |
| Cluster 02 & 09 | 10454709 | Kif20a/Cdc23       | 3.45  | Microtubule binding motor protein                                                             |
| Cluster 02 & 09 | 10444505 | Rdbp (Nelfe)       | 2.07  | Misc.                                                                                         |
| Cluster 02 & 09 | 10593490 | Gm6981/Gapdh       | 2.31  | Misc.                                                                                         |
| Cluster 02 & 09 | 10465912 | Fen1               | 2.32  | Misc.                                                                                         |
| Cluster 02 & 09 | 10451547 | 10451547           | 2.36  | Misc.                                                                                         |
| Cluster 02 & 09 | 10388880 | Tmem97             | 2.40  | Misc.                                                                                         |
| Cluster 02 & 09 | 10482432 | 10482432           | 2.42  | Misc.                                                                                         |
| Cluster 02 & 09 | 10554817 | 10554817           | 2.43  | Misc.                                                                                         |
| Cluster 02 & 09 | 10414431 | 10414431           | 2.49  | Misc.                                                                                         |
| Cluster 02 & 09 | 10547916 | Ptms               | 2.50  | Misc.                                                                                         |
| Cluster 02 & 09 | 10463632 | Tmem180            | 2.59  | Misc.                                                                                         |
| Cluster 02 & 09 | 10364102 | Chchd10            | 2.59  | Misc.                                                                                         |
| Cluster 02 & 09 | 10393823 | P4hb               | 2.60  | Misc.                                                                                         |
| Cluster 02 & 09 | 10578916 | Sc4mol             | 2.60  | Misc.                                                                                         |
| Cluster 02 & 09 | 10486255 | Oip5/Nusap1        | 2.65  | Misc.                                                                                         |
| Cluster 02 & 09 | 10528480 | Rpl17              | 2.72  | Misc.                                                                                         |
| Cluster 02 & 09 | 10548565 | Magohb             | 2.82  | Misc.                                                                                         |
| Cluster 02 & 09 | 10440393 | Samsn1             | 3.10  | Misc.                                                                                         |
| Cluster 02 & 09 | 10369885 | Cisd1              | 3.26  | Misc.                                                                                         |
| Cluster 02 & 09 | 10597461 | Cntm7              | 3.27  | Misc.                                                                                         |
| Cluster 02 & 09 | 10535065 | Adap1              | 3.41  | Misc.                                                                                         |
| Cluster 02 & 09 | 10407946 | Stard3nl           | 3.51  | Misc.                                                                                         |
| Cluster 02 & 09 | 10519324 | Cdk6               | 3.83  | Misc.                                                                                         |
| Cluster 02 & 09 | 10515257 | Rad54l             | 3.83  | Misc.                                                                                         |
| Cluster 02 & 09 | 10420877 | Esco2              | 3.93  | Misc.                                                                                         |
| Cluster 02 & 09 | 10490838 | Fabp5              | 3.99  | Misc.                                                                                         |
| Cluster 02 & 09 | 10355329 | Bard1              | 4.03  | Misc.                                                                                         |
| Cluster 02 & 09 | 10371591 | 4930547N16Rik/Pmch | 4.07  | Misc.                                                                                         |
| Cluster 02 & 09 | 10585699 | Fabp5              | 4.21  | Misc.                                                                                         |
| Cluster 02 & 09 | 10568785 | Bnip3              | 4.39  | Misc.                                                                                         |

|                 |          |                       |        |                                                                                                                                 |
|-----------------|----------|-----------------------|--------|---------------------------------------------------------------------------------------------------------------------------------|
| Cluster 02 & 09 | 10545958 | Anxa4                 | 4.55   | Misc.                                                                                                                           |
| Cluster 02 & 09 | 10568873 | Adam8                 | 4.59   | Misc.                                                                                                                           |
| Cluster 02 & 09 | 10592201 | Chek1                 | 5.21   | Misc.                                                                                                                           |
| Cluster 02 & 09 | 10471844 | Nek6                  | 5.41   | Misc.                                                                                                                           |
| Cluster 02 & 09 | 10407955 | Epdr1                 | 6.14   | Misc.                                                                                                                           |
| Cluster 02 & 09 | 10586744 | Anxa2                 | 6.59   | Misc.                                                                                                                           |
| Cluster 02 & 09 | 10429140 | Ndrg1                 | 7.43   | Misc.                                                                                                                           |
| Cluster 02 & 09 | 10461587 | Ms4a4a                | 8.83   | Misc.                                                                                                                           |
| Cluster 02 & 09 | 10414269 | Bnip3                 | 10.01  | Misc.                                                                                                                           |
| Cluster 02 & 09 | 10595298 | Filip1                | 13.26  | Misc.                                                                                                                           |
| Cluster 02 & 09 | 10439845 | Gm5486                | 17.88  | Misc.                                                                                                                           |
| Cluster 02 & 09 | 10582549 | Mela                  | 64.18  | Misc.                                                                                                                           |
| Cluster 02 & 09 | 10582545 | Mela/Kcnma1           | 169.29 | Misc.                                                                                                                           |
| Cluster 02 & 09 | 10594426 | Zwilch/Lctl           | 3.29   | Misc.                                                                                                                           |
| Cluster 02 & 09 | 10452508 | Twsg1                 | 4.68   | Misc.                                                                                                                           |
| Cluster 02 & 09 | 10601705 | Cenpi                 | 2.98   | mRNA splicing factor                                                                                                            |
| Cluster 02 & 09 | 10518561 | Apitd1                | 3.01   | Neuropeptide                                                                                                                    |
| Cluster 02 & 09 | 10539135 | Capg                  | 13.60  | Non-motor actin binding protein, calcium-binding protein                                                                        |
| Cluster 02 & 09 | 10454786 | Ctnna1                | 6.07   | Non-motor actin binding protein, cell adhesion molecule                                                                         |
| Cluster 02 & 09 | 10587508 | Ttk                   | 6.18   | Non-receptor serine/threonine protein kinase                                                                                    |
| Cluster 02 & 09 | 10515295 | Mast2                 | 2.06   | Non-receptor serine/threonine protein kinase, transfer/carrier protein, calmodulin                                              |
| Cluster 02 & 09 | 10393431 | Tk1                   | 3.68   | Nucleotide kinase                                                                                                               |
| Cluster 02 & 09 | 10463070 | Entpd1                | 7.00   | Nucleotide phosphatase, lyase, nucleic acid binding                                                                             |
| Cluster 02 & 09 | 10408531 | Gmds                  | 2.45   | Oxidoreductase, dehydratase, epimerase/racemase                                                                                 |
| Cluster 02 & 09 | 10424349 | Sqle                  | 2.41   | Oxygenase                                                                                                                       |
| Cluster 02 & 09 | 10350516 | Ptgs2                 | 18.45  | Oxygenase                                                                                                                       |
| Cluster 02 & 09 | 10510260 | Nppb                  | 2.69   | Peptide hormone                                                                                                                 |
| Cluster 02 & 09 | 10592001 | St14                  | 7.32   | Peptide hormone, receptor, serine protease, protease inhibitor, annexin, calmodulin                                             |
| Cluster 02 & 09 | 10367945 | Phactr2               | 4.22   | Phosphatase modulator                                                                                                           |
| Cluster 02 & 09 | 10374236 | Upp1                  | 5.33   | Phosphorylase                                                                                                                   |
| Cluster 02 & 09 | 10416037 | Pbk                   | 5.87   | Protein kinase                                                                                                                  |
| Cluster 02 & 09 | 10483381 | Stk39                 | 4.14   | Protein kinase activity                                                                                                         |
| Cluster 02 & 09 | 10501629 | Cdc14a                | 3.75   | Protein phosphatase                                                                                                             |
| Cluster 02 & 09 | 10585932 | Pkm                   | 2.52   | Pyruvate kinase activity                                                                                                        |
| Cluster 02 & 09 | 10351644 | Cd244 (2B4)/LOC677008 | 3.56   | Receptor                                                                                                                        |
| Cluster 02 & 09 | 10375443 | Havr2 (TIM-3, CD366)  | 19.74  | Receptor                                                                                                                        |
| Cluster 02 & 09 | 10473281 | Igav (CD51)           | 5.73   | Receptor, contributes to opsonin binding, contributes to protein kinase C binding                                               |
| Cluster 02 & 09 | 10583732 | Ldlr                  | 2.42   | Receptor, extracellular matrix glycoprotein                                                                                     |
| Cluster 02 & 09 | 10555695 | Rrm1                  | 3.28   | Reductase                                                                                                                       |
| Cluster 02 & 09 | 10586604 | Rps271                | 2.93   | Ribosomal protein                                                                                                               |
| Cluster 02 & 09 | 10372877 | Xpot                  | 2.61   | RNA binding protein                                                                                                             |
| Cluster 02 & 09 | 10420308 | Gzmb                  | 2.30   | Serine protease                                                                                                                 |
| Cluster 02 & 09 | 10420295 | Gzmf                  | 161.81 | Serine protease                                                                                                                 |
| Cluster 02 & 09 | 10404439 | Serpinb9b             | 21.68  | Serine protease inhibitor                                                                                                       |
| Cluster 02 & 09 | 10414360 | Lgals3                | 4.46   | Signaling molecule, cell adhesion molecule                                                                                      |
| Cluster 02 & 09 | 10472501 | Lass6 (Cers6)         | 4.85   | Sphingosine N-acyltransferase                                                                                                   |
| Cluster 02 & 09 | 10371959 | Elk3/Cdk17            | 2.48   | Transcription factor, DNA-binding protein                                                                                       |
| Cluster 02 & 09 | 10569057 | Rnh1                  | 2.16   | Transcription factor, nucleic acid binding                                                                                      |
| Cluster 02 & 09 | 10582981 | Tfdp1                 | 2.96   | Transcription factor, nucleic acid binding                                                                                      |
| Cluster 02 & 09 | 10521913 | Rbpj                  | 6.04   | transcription factor, nucleic acid binding                                                                                      |
| Cluster 02 & 09 | 10576034 | Irf8                  | 13.65  | Transcription factor, nucleic acid binding                                                                                      |
| Cluster 02 & 09 | 10438626 | Etv5                  | 5.75   | Transcription factor, signaling molecule, nucleic acid binding                                                                  |
| Cluster 02 & 09 | 10391461 | Brcal                 | 3.15   | Transcription regulator, ubiquitin-protein ligase                                                                               |
| Cluster 02 & 09 | 10383502 | Slc16a3               | 4.61   | Transporter                                                                                                                     |
| Cluster 02 & 09 | 10510580 | Tnfrsf9 (4-1BB)       | 25.87  | Tumor necrosis factor receptor                                                                                                  |
| Cluster 02 & 09 | 10345752 | Il1r2 (CD121b)        | 16.75  | Type I cytokine receptor                                                                                                        |
| Cluster 02 & 10 | 10556426 | Parva                 | 6.27   | Actin and actin related protein                                                                                                 |
| Cluster 02 & 10 | 10416800 | Lmo7                  | 3.60   | Actin family cytoskeletal protein                                                                                               |
| Cluster 02 & 10 | 10489204 | Tgm2                  | 3.43   | Acyltransferase                                                                                                                 |
| Cluster 02 & 10 | 10456522 | Tcf4                  | 3.19   | Basic helix-loop-helix transcription factor, nucleic acid binding                                                               |
| Cluster 02 & 10 | 10498018 | Pcdh18                | 3.43   | Cadherin                                                                                                                        |
| Cluster 02 & 10 | 10533050 | Hspb8                 | 2.77   | Chaperone                                                                                                                       |
| Cluster 02 & 10 | 10348632 | Twist2                | 2.49   | Chromatin binding, transcription factor activity, RNA polymerase II transcription factor binding, sequence-specific DNA binding |
| Cluster 02 & 10 | 10595371 | Hmgn3                 | 2.51   | Chromatin/chromatin-binding protein                                                                                             |
| Cluster 02 & 10 | 10516735 | Tinagl1               | 2.66   | Cysteine protease                                                                                                               |

|                 |          |                     |      |                                                                                                                                              |
|-----------------|----------|---------------------|------|----------------------------------------------------------------------------------------------------------------------------------------------|
| Cluster 02 & 10 | 10395320 | Twist1              | 4.40 | E-box binding, protein heterodimerization activity, transcription factor activity, sequence-specific DNA binding                             |
| Cluster 02 & 10 | 10531794 | Wdfy3               | 3.66 | Enzyme modulator                                                                                                                             |
| Cluster 02 & 10 | 10571142 | Gpr124              | 2.98 | G-protein coupled receptor, antibacterial response protein                                                                                   |
| Cluster 02 & 10 | 10588037 | Rbp1                | 3.19 | G-protein modulator                                                                                                                          |
| Cluster 02 & 10 | 10363173 | Gja1                | 7.28 | Gap junction                                                                                                                                 |
| Cluster 02 & 10 | 10475643 | Fgf7                | 2.94 | Growth factor                                                                                                                                |
| Cluster 02 & 10 | 10476395 | Bmp2                | 4.05 | Growth factor                                                                                                                                |
| Cluster 02 & 10 | 10427402 | Ghr                 | 5.03 | Growth hormone receptor                                                                                                                      |
| Cluster 02 & 10 | 10358733 | Rgl1                | 7.61 | guanyl-nucleotide exchange factor                                                                                                            |
| Cluster 02 & 10 | 10465820 | Gng3                | 4.69 | Heterotrimeric G-protein                                                                                                                     |
| Cluster 02 & 10 | 10458663 | Dpysl3              | 2.54 | Hydrolase                                                                                                                                    |
| Cluster 02 & 10 | 10481592 | Dnm1                | 3.33 | Hydrolase, small GTPase, microtubule family cytoskeletal protein                                                                             |
| Cluster 02 & 10 | 10594110 | Neo1                | 3.02 | Immunoglobulin receptor superfamily, protein phosphatase, immunoglobulin superfamily cell adhesion molecule                                  |
| Cluster 02 & 10 | 10501608 | Vcam1 (CD106)       | 5.02 | Immunoglobulin receptor superfamily, protein phosphatase, immunoglobulin superfamily cell adhesion molecule                                  |
| Cluster 02 & 10 | 10523727 | Pkd2                | 3.35 | Ion channel, membrane-bound signaling molecule, G-protein modulator                                                                          |
| Cluster 02 & 10 | 10458906 | Ppic                | 3.81 | Isomerase                                                                                                                                    |
| Cluster 02 & 10 | 10538547 | Fkbp9               | 2.65 | isomerase, chaperone, calcium-binding protein                                                                                                |
| Cluster 02 & 10 | 10560190 | Ehd2                | 4.87 | Membrane traffic protein, G-protein modulator, calcium-binding protein                                                                       |
| Cluster 02 & 10 | 10423548 | Sdc2                | 4.58 | Membrane-bound signaling molecule, extracellular matrix glycoprotein, defense/immunity protein, cytoskeletal protein, cell adhesion molecule |
| Cluster 02 & 10 | 10574027 | Mt1                 | 6.33 | Metal ion binding                                                                                                                            |
| Cluster 02 & 10 | 10415052 | Mmp14               | 3.21 | Metalloendopeptidase                                                                                                                         |
| Cluster 02 & 10 | 10476648 | Dstn                | 2.29 | Misc.                                                                                                                                        |
| Cluster 02 & 10 | 10500204 | Ecm1                | 2.35 | Misc.                                                                                                                                        |
| Cluster 02 & 10 | 10421697 | 9030625A04Rik       | 2.44 | Misc.                                                                                                                                        |
| Cluster 02 & 10 | 10467191 | Ankrd1              | 2.52 | Misc.                                                                                                                                        |
| Cluster 02 & 10 | 10356968 | Pam                 | 2.54 | Misc.                                                                                                                                        |
| Cluster 02 & 10 | 10403727 | Gli3                | 2.60 | Misc.                                                                                                                                        |
| Cluster 02 & 10 | 10485948 | Grem1               | 2.60 | Misc.                                                                                                                                        |
| Cluster 02 & 10 | 10485607 | Qser1               | 2.84 | Misc.                                                                                                                                        |
| Cluster 02 & 10 | 10433264 | Glis2               | 2.87 | Misc.                                                                                                                                        |
| Cluster 02 & 10 | 10567995 | Nupr1               | 3.00 | Misc.                                                                                                                                        |
| Cluster 02 & 10 | 10381122 | Fkbp10/Nt5c31       | 3.03 | Misc.                                                                                                                                        |
| Cluster 02 & 10 | 10427744 | Rai14               | 3.42 | Misc.                                                                                                                                        |
| Cluster 02 & 10 | 10527965 | Cldn12              | 3.45 | Misc.                                                                                                                                        |
| Cluster 02 & 10 | 10527940 | Cdk14               | 4.07 | Misc.                                                                                                                                        |
| Cluster 02 & 10 | 10532741 | Tmem119             | 4.35 | Misc.                                                                                                                                        |
| Cluster 02 & 10 | 10431935 | Amigo2/Fam113b      | 4.73 | Misc.                                                                                                                                        |
| Cluster 02 & 10 | 10427125 | Igfbp6              | 5.55 | Misc.                                                                                                                                        |
| Cluster 02 & 10 | 10394534 | Osr1                | 6.33 | Misc.                                                                                                                                        |
| Cluster 02 & 10 | 10447951 | Thbs2               | 6.86 | Misc.                                                                                                                                        |
| Cluster 02 & 10 | 10417759 | Ube2e2/LOC100861885 | 2.88 | Misc.                                                                                                                                        |
| Cluster 02 & 10 | 10438603 | Igf2bp2             | 2.42 | mRNA splicing factor, ribonucleoprotein, enzyme modulator                                                                                    |
| Cluster 02 & 10 | 10472097 | Fmn12               | 2.53 | Non-motor actin binding protein                                                                                                              |
| Cluster 02 & 10 | 10495659 | Cnn3                | 2.65 | Non-motor actin binding protein                                                                                                              |
| Cluster 02 & 10 | 10345241 | Dst                 | 2.84 | Non-motor actin binding protein                                                                                                              |
| Cluster 02 & 10 | 10527158 | Fsen1               | 3.50 | Non-motor actin binding protein                                                                                                              |
| Cluster 02 & 10 | 10537184 | Cald1               | 5.72 | Non-motor actin binding protein                                                                                                              |
| Cluster 02 & 10 | 10352194 | Cdc42bpa            | 2.31 | Non-receptor serine/threonine protein kinase                                                                                                 |
| Cluster 02 & 10 | 10528015 | Steap1              | 3.66 | NOT cupric reductase activity, NOT ferric-chelate reductase (NADPH) activity                                                                 |
| Cluster 02 & 10 | 10564527 | Nr2f2               | 6.27 | Nuclear hormone receptor, receptor, nucleic acid binding                                                                                     |
| Cluster 02 & 10 | 10477061 | Srxn1               | 2.39 | Oxidoreductase activity, acting on a sulfur group of donors                                                                                  |
| Cluster 02 & 10 | 10356084 | Irs1                | 2.69 | phosphatidylinositol 3-kinase binding, protein kinase binding                                                                                |
| Cluster 02 & 10 | 10424370 | Trib1               | 2.29 | Protein kinase                                                                                                                               |
| Cluster 02 & 10 | 10536505 | Met                 | 2.89 | Protein kinase activity, hepatocyte growth factor-activated receptor activity                                                                |
| Cluster 02 & 10 | 10427095 | Tenc1               | 2.53 | Protein phosphatase                                                                                                                          |
| Cluster 02 & 10 | 10538150 | Tmem176a            | 5.50 | Receptor                                                                                                                                     |
| Cluster 02 & 10 | 10439651 | Cd200               | 6.34 | Receptor                                                                                                                                     |
| Cluster 02 & 10 | 10373223 | Lrp1 (CD91)         | 3.21 | Receptor, extracellular matrix glycoprotein                                                                                                  |
| Cluster 02 & 10 | 10417212 | Itgb11              | 2.76 | Receptor, extracellular matrix glycoprotein, cell adhesion molecule                                                                          |
| Cluster 02 & 10 | 10490384 | Lama5               | 2.24 | Receptor, extracellular matrix linker protein                                                                                                |

|                 |          |               |       |                                                                                                                                                                                                                               |
|-----------------|----------|---------------|-------|-------------------------------------------------------------------------------------------------------------------------------------------------------------------------------------------------------------------------------|
| Cluster 02 & 10 | 10395163 | Lamb1         | 3.91  | Receptor, extracellular matrix linker protein                                                                                                                                                                                 |
| Cluster 02 & 10 | 10375175 | Slit3         | 3.30  | Receptor, extracellular matrix protein                                                                                                                                                                                        |
| Cluster 02 & 10 | 10463836 | Gsto1         | 2.60  | Serine protease                                                                                                                                                                                                               |
| Cluster 02 & 10 | 10355984 | Serpine2      | 4.18  | Serine protease inhibitor                                                                                                                                                                                                     |
| Cluster 02 & 10 | 10388430 | Serpinf1      | 5.04  | Serine protease inhibitor                                                                                                                                                                                                     |
| Cluster 02 & 10 | 10446928 | Ltbp1         | 3.95  | Signaling molecule                                                                                                                                                                                                            |
| Cluster 02 & 10 | 10422728 | Dab2          | 8.72  | Signaling molecule                                                                                                                                                                                                            |
| Cluster 02 & 10 | 10484227 | Sestd1        | 3.03  | Signaling molecule, guanyl-nucleotide exchange factor                                                                                                                                                                         |
| Cluster 02 & 10 | 10564220 | Gkap1         | 2.24  | Structural protein                                                                                                                                                                                                            |
| Cluster 02 & 10 | 10416175 | Nefl          | 2.40  | Structural protein, intermediate filament                                                                                                                                                                                     |
| Cluster 02 & 10 | 10421100 | Nefm          | 3.66  | Structural protein, intermediate filament                                                                                                                                                                                     |
| Cluster 02 & 10 | 10416522 | Tsc22d1       | 3.59  | Transcription factor                                                                                                                                                                                                          |
| Cluster 02 & 10 | 10432540 | Lima1         | 2.59  | Transcription factor, nuclease, actin family cytoskeletal protein                                                                                                                                                             |
| Cluster 02 & 10 | 10576049 | Foxf1         | 4.49  | Transcription factor, nucleic acid binding                                                                                                                                                                                    |
| Cluster 02 & 10 | 10372796 | Hmga2         | 5.49  | Transcriptional activator activity, DNA-binding protein                                                                                                                                                                       |
| Cluster 02 & 10 | 10548905 | Eps8          | 5.04  | Transmembrane receptor regulatory/adaptor protein                                                                                                                                                                             |
| Cluster 02 & 10 | 10536494 | Cav2          | 5.27  | Transmembrane receptor regulatory/adaptor protein, structural protein, membrane traffic protein, G-protein modulator                                                                                                          |
| Cluster 02 & 10 | 10387791 | Slc16a13      | 2.95  | Transporter                                                                                                                                                                                                                   |
| Cluster 02 & 10 | 10346843 | Nrp2          | 2.71  | Transporter, apolipoprotein, membrane-bound signaling molecule, receptor, metalloprotease, serine protease, oxidase, metalloprotease, serine protease, extracellular matrix protein, enzyme modulator, cell adhesion molecule |
| Cluster 02 & 10 | 10490989 | Cp            | 3.01  | Transporter, apolipoprotein, membrane-bound signaling molecule, receptor, metalloprotease, serine protease, oxidase, metalloprotease, serine protease, extracellular matrix protein, enzyme modulator, cell adhesion molecule |
| Cluster 02 & 10 | 10536220 | Col1a2        | 3.38  | Transporter, surfactant, receptor, extracellular matrix structural protein, antibacterial response protein                                                                                                                    |
| Cluster 02 & 10 | 10440091 | Col8a1        | 3.24  | Transporter, surfactant, receptor, extracellular matrix structural protein, antibacterial response protein, cell adhesion molecule                                                                                            |
| Cluster 02 & 11 | 10351206 | Selp          | 5.66  | Adpolipoprotein, receptor, metalloprotease, serine protease, complement component, cell adhesion molecule                                                                                                                     |
| Cluster 02 & 11 | 10536818 | Calu          | 2.91  | Calmodulin                                                                                                                                                                                                                    |
| Cluster 02 & 11 | 10605766 | Maged1        | 8.12  | Cell adhesion molecule                                                                                                                                                                                                        |
| Cluster 02 & 11 | 10360315 | Fcrl6         | 10.72 | Cell adhesion molecule                                                                                                                                                                                                        |
| Cluster 02 & 11 | 10379511 | Ccl2          | 21.26 | Chemokine                                                                                                                                                                                                                     |
| Cluster 02 & 11 | 10528008 | Steap2        | 8.35  | Cupric reductase activity, ferric-chelate reductase (NADPH) activity                                                                                                                                                          |
| Cluster 02 & 11 | 10521667 | Bst1          | 2.39  | Cyclase, glycosidase                                                                                                                                                                                                          |
| Cluster 02 & 11 | 10410124 | Ctsl          | 16.42 | Cysteine protease                                                                                                                                                                                                             |
| Cluster 02 & 11 | 10364375 | Cstb          | 2.26  | Cysteine protease inhibitor                                                                                                                                                                                                   |
| Cluster 02 & 11 | 10545672 | Mthfd2        | 2.26  | Dehydrogenase, ligase, hydrolase                                                                                                                                                                                              |
| Cluster 02 & 11 | 10460585 | Foxl1/Ccde85b | 3.74  | DNA-binding protein                                                                                                                                                                                                           |
| Cluster 02 & 11 | 10553598 | Cyfip1        | 3.07  | G-protein modulator                                                                                                                                                                                                           |
| Cluster 02 & 11 | 10350725 | Rgs8          | 8.05  | G-protein modulator                                                                                                                                                                                                           |
| Cluster 02 & 11 | 10458340 | Hbegf         | 6.27  | Growth factor                                                                                                                                                                                                                 |
| Cluster 02 & 11 | 10502655 | Cyr61         | 8.77  | Growth factor                                                                                                                                                                                                                 |
| Cluster 02 & 11 | 10523175 | Ereg          | 11.01 | Growth factor                                                                                                                                                                                                                 |
| Cluster 02 & 11 | 10417095 | Farp1         | 4.58  | Guanyl-nucleotide exchange factor                                                                                                                                                                                             |
| Cluster 02 & 11 | 10359624 | Prrx1         | 11.05 | Homeobox transcription factor, DNA binding protein                                                                                                                                                                            |
| Cluster 02 & 11 | 10565315 | Fah           | 3.01  | Isomerase, hydrolase                                                                                                                                                                                                          |
| Cluster 02 & 11 | 10569646 | Ccnd1         | 9.76  | Kinase activator                                                                                                                                                                                                              |
| Cluster 02 & 11 | 10473356 | Ube2l6        | 2.85  | Ligase                                                                                                                                                                                                                        |
| Cluster 02 & 11 | 10377938 | Eno3          | 6.08  | Lyase                                                                                                                                                                                                                         |
| Cluster 02 & 11 | 10467258 | Myof          | 7.47  | Membrane traffic protein                                                                                                                                                                                                      |
| Cluster 02 & 11 | 10423520 | Sema5a        | 5.16  | Membrane-bound signaling molecule                                                                                                                                                                                             |
| Cluster 02 & 11 | 10519717 | Sema3a        | 10.77 | Membrane-bound signaling molecule                                                                                                                                                                                             |
| Cluster 02 & 11 | 10498576 | Lxn           | 7.57  | Metalloendopeptidase inhibitor                                                                                                                                                                                                |
| Cluster 02 & 11 | 10598976 | Timp1         | 20.58 | Metalloprotease inhibitor                                                                                                                                                                                                     |
| Cluster 02 & 11 | 10585214 | Cryab/Hspb2   | 2.10  | Misc.                                                                                                                                                                                                                         |
| Cluster 02 & 11 | 10525887 | Bri3bp        | 2.13  | Misc.                                                                                                                                                                                                                         |
| Cluster 02 & 11 | 10386947 | 10386947      | 2.33  | Misc.                                                                                                                                                                                                                         |
| Cluster 02 & 11 | 10539263 | Loxl3/Htra2   | 2.42  | Misc.                                                                                                                                                                                                                         |
| Cluster 02 & 11 | 10389238 | Dusp14        | 2.47  | Misc.                                                                                                                                                                                                                         |
| Cluster 02 & 11 | 10359929 | Ddr2          | 2.51  | Misc.                                                                                                                                                                                                                         |
| Cluster 02 & 11 | 10361887 | Perp          | 2.58  | Misc.                                                                                                                                                                                                                         |
| Cluster 02 & 11 | 10542791 | Ppfibp1       | 2.89  | Misc.                                                                                                                                                                                                                         |
| Cluster 02 & 11 | 10428103 | Stk3          | 3.06  | Misc.                                                                                                                                                                                                                         |
| Cluster 02 & 11 | 10368508 | Cenpw         | 3.23  | Misc.                                                                                                                                                                                                                         |

|                 |          |                                                         |       |                                                                                                                                                                                                                               |
|-----------------|----------|---------------------------------------------------------|-------|-------------------------------------------------------------------------------------------------------------------------------------------------------------------------------------------------------------------------------|
| Cluster 02 & 11 | 10346747 | Cyp20a1                                                 | 3.37  | Misc.                                                                                                                                                                                                                         |
| Cluster 02 & 11 | 10411519 | Mtap1b                                                  | 3.42  | Misc.                                                                                                                                                                                                                         |
| Cluster 02 & 11 | 10501222 | Gstm2                                                   | 3.73  | Misc.                                                                                                                                                                                                                         |
| Cluster 02 & 11 | 10417124 | B930095G15Rik                                           | 4.47  | Misc.                                                                                                                                                                                                                         |
| Cluster 02 & 11 | 10547740 | C1s/Gm5077                                              | 4.79  | Misc.                                                                                                                                                                                                                         |
| Cluster 02 & 11 | 10439009 | Apod                                                    | 4.97  | Misc.                                                                                                                                                                                                                         |
| Cluster 02 & 11 | 10561104 | Axl                                                     | 5.48  | Misc.                                                                                                                                                                                                                         |
| Cluster 02 & 11 | 10360398 | Ifi202b                                                 | 5.57  | Misc.                                                                                                                                                                                                                         |
| Cluster 02 & 11 | 10498273 | Tm4sf1                                                  | 6.00  | Misc.                                                                                                                                                                                                                         |
| Cluster 02 & 11 | 10497817 | Anxa5                                                   | 6.44  | Misc.                                                                                                                                                                                                                         |
| Cluster 02 & 11 | 10346164 | Sdpr                                                    | 6.95  | Misc.                                                                                                                                                                                                                         |
| Cluster 02 & 11 | 10577641 | 1810011O10Rik                                           | 8.86  | Misc.                                                                                                                                                                                                                         |
| Cluster 02 & 11 | 10388254 | Aspa                                                    | 8.88  | Misc.                                                                                                                                                                                                                         |
| Cluster 02 & 11 | 10405063 | Ogn                                                     | 9.17  | Misc.                                                                                                                                                                                                                         |
| Cluster 02 & 11 | 10405047 | Aspn                                                    | 9.56  | Misc.                                                                                                                                                                                                                         |
| Cluster 02 & 11 | 10523451 | Anxa3                                                   | 11.17 | Misc.                                                                                                                                                                                                                         |
| Cluster 02 & 11 | 10608724 | 10608724                                                | 16.00 | Misc.                                                                                                                                                                                                                         |
| Cluster 02 & 11 | 10360070 | Fcer1g                                                  | 18.33 | Misc.                                                                                                                                                                                                                         |
| Cluster 02 & 11 | 10408689 | Nrn1                                                    | 20.96 | Misc.                                                                                                                                                                                                                         |
| Cluster 02 & 11 | 10535559 | Baiap211 (IRTKS)                                        | 24.42 | Misc.                                                                                                                                                                                                                         |
| Cluster 02 & 11 | 10502224 | Sgms2                                                   | 3.37  | Misc.                                                                                                                                                                                                                         |
| Cluster 02 & 11 | 10348354 | Ugt1a9/Ugt1a1/Ugt1a5/Ugt1a10/Ugt1a2/<br>Ugt1a6a/Ugt1a7c | 5.52  | Misc.                                                                                                                                                                                                                         |
| Cluster 02 & 11 | 10453825 | Snrpd1                                                  | 2.02  | mRNA splicing factor, ribonucleoprotein                                                                                                                                                                                       |
| Cluster 02 & 11 | 10523511 | Prkg2                                                   | 8.92  |                                                                                                                                                                                                                               |
| Cluster 02 & 11 | 10390117 | Itga3 (CD49c)                                           | 2.68  | Non-receptor serine/threonine protein kinase                                                                                                                                                                                  |
| Cluster 02 & 11 | 10521759 | Slit2                                                   | 19.17 | Receptor                                                                                                                                                                                                                      |
| Cluster 02 & 11 | 10537146 | Akr1b8                                                  | 5.58  | Receptor, extracellular matrix protein                                                                                                                                                                                        |
| Cluster 02 & 11 | 10433480 | Rpl39l                                                  | 16.63 | Reductase                                                                                                                                                                                                                     |
| Cluster 02 & 11 | 10420274 | Gzmd                                                    | 95.97 | Ribosomal protein                                                                                                                                                                                                             |
| Cluster 02 & 11 | 10565794 | Serpinh1                                                | 2.97  | serine protease                                                                                                                                                                                                               |
| Cluster 02 & 11 | 10484463 | Serping1                                                | 5.36  | Serine protease inhibitor                                                                                                                                                                                                     |
| Cluster 02 & 11 | 10403834 | Sfrp4                                                   | 2.27  | Serine protease inhibitor                                                                                                                                                                                                     |
| Cluster 02 & 11 | 10605797 | Arhgef9                                                 | 4.41  | Signaling molecule, G-protein coupled receptor                                                                                                                                                                                |
| Cluster 02 & 11 | 10495054 | Rhoc                                                    | 3.11  | Signaling molecule, G-protein coupled receptor                                                                                                                                                                                |
| Cluster 02 & 11 | 10548879 | Mgp                                                     | 9.25  | Signaling molecule, G-protein coupled receptor                                                                                                                                                                                |
| Cluster 02 & 11 | 10466745 | Tjp2                                                    | 2.43  | small GTPase                                                                                                                                                                                                                  |
| Cluster 02 & 11 | 10442327 | Cldn6                                                   | 3.20  | Structural protein, signaling molecule, extracellular matrix                                                                                                                                                                  |
| Cluster 02 & 11 | 10400006 | Ahr                                                     | 3.29  | structural protein, annexin, calmodulin                                                                                                                                                                                       |
| Cluster 02 & 11 | 10391332 | Ptfr                                                    | 3.60  | Tight junction                                                                                                                                                                                                                |
| Cluster 02 & 11 | 10353010 | Mybl1                                                   | 3.14  | Tight junction                                                                                                                                                                                                                |
| Cluster 02 & 11 | 10514054 | Nfib                                                    | 3.79  | Transcription factor                                                                                                                                                                                                          |
| Cluster 02 & 11 | 10458555 | Spry4                                                   | 3.86  | Transcription factor, DNA binding protein                                                                                                                                                                                     |
| Cluster 02 & 11 | 10562905 | Atf5/Nup62/Nup62-il4i1/Il4i1                            | 2.10  | Transcription factor, nucleic acid binding                                                                                                                                                                                    |
| Cluster 02 & 11 | 10536499 | Cav1                                                    | 20.84 | Transcription factor, signaling molecule                                                                                                                                                                                      |
| Cluster 02 & 11 | 10487021 | Slc30a4                                                 | 7.81  | Transcription regulator                                                                                                                                                                                                       |
| Cluster 02 & 11 | 10534862 | Pcolce                                                  | 22.29 | Transmembrane receptor regulatory/adaptor protein, structural protein, membrane traffic protein, G-protein modulator                                                                                                          |
| Cluster 02 & 11 | 10456400 | Tubb6                                                   | 5.81  | Transporter                                                                                                                                                                                                                   |
| Cluster 02 & 11 | 10585395 | Siva1                                                   | 2.78  | Transporter, apolipoprotein, membrane-bound signaling molecule, receptor, metalloprotease, serine protease, oxidase, metalloprotease, serine protease, extracellular matrix protein, enzyme modulator, cell adhesion molecule |
| Cluster 02 & 11 | 10398874 | Siva1                                                   | 2.82  | Tubulin                                                                                                                                                                                                                       |
| Cluster 02 & 12 | 10519555 | Abcb1b                                                  | 2.51  | Virus receptor activity                                                                                                                                                                                                       |
| Cluster 02 & 12 | 10544002 | Creb3l2                                                 | 3.35  | Virus receptor activity                                                                                                                                                                                                       |
| Cluster 02 & 12 | 10385912 | Csf2                                                    | 5.30  | ATP-binding cassette (ABC) transporter                                                                                                                                                                                        |
| Cluster 02 & 12 | 10501164 | Csf1                                                    | 9.94  | CREB transcription factor, nucleic acid binding                                                                                                                                                                               |
| Cluster 02 & 12 | 10590242 | Ccr8                                                    | 4.14  | Cytokine                                                                                                                                                                                                                      |
| Cluster 02 & 12 | 10350733 | Rgs16                                                   | 14.23 | Cytokine                                                                                                                                                                                                                      |
| Cluster 02 & 12 | 10424543 | Wisp1                                                   | 3.06  | G-protein coupled receptor, immunoglobulin receptor superfamily, protein phosphatase, immunoglobulin superfamily cell adhesion molecule                                                                                       |
| Cluster 02 & 12 | 10404053 | Hist1h2bc/Hist1h2bg/Hist1h2be                           | 7.38  | G-protein modulator                                                                                                                                                                                                           |
| Cluster 02 & 12 | 10355312 | Ikzf2                                                   | 5.79  | Growth factor                                                                                                                                                                                                                 |
| Cluster 02 & 12 | 10548430 | Gm156                                                   | 39.76 | Histone                                                                                                                                                                                                                       |
|                 |          |                                                         |       | KRAB box transcription factor                                                                                                                                                                                                 |
|                 |          |                                                         |       | Membrane-bound signaling molecule, receptor, defense/immunity protein                                                                                                                                                         |



|                 |          |                  |       |                                                                                            |
|-----------------|----------|------------------|-------|--------------------------------------------------------------------------------------------|
| Cluster 02 & 12 | 10459905 | Setbp1           | 4.45  | Methyltransferase, DNA binding protein                                                     |
| Cluster 02 & 12 | 10542205 | Klre1            | 7.99  | Microtubule binding motor protein                                                          |
| Cluster 02 & 12 | 10481491 | Ier5l            | 2.25  | Misc.                                                                                      |
| Cluster 02 & 12 | 10462398 | Pdcd1lg2 (PD-L2) | 2.28  | Misc.                                                                                      |
| Cluster 02 & 12 | 10539617 | Alms1            | 2.31  | Misc.                                                                                      |
| Cluster 02 & 12 | 10366043 | Dusp6            | 2.42  | Misc.                                                                                      |
| Cluster 02 & 12 | 10544250 | E330009J07Rik    | 2.44  | Misc.                                                                                      |
| Cluster 02 & 12 | 10444890 | Ier3             | 2.55  | Misc.                                                                                      |
| Cluster 02 & 12 | 10361995 | Fam54a           | 2.79  | Misc.                                                                                      |
| Cluster 02 & 12 | 10369290 | Ddit4            | 3.24  | Misc.                                                                                      |
| Cluster 02 & 12 | 10536794 | Hilpda           | 3.25  | Misc.                                                                                      |
| Cluster 02 & 12 | 10349081 | Phlpp1           | 3.29  | Misc.                                                                                      |
| Cluster 02 & 12 | 10513190 | D630039A03Rik    | 3.46  | Misc.                                                                                      |
| Cluster 02 & 12 | 10548735 | Dusp16           | 3.83  | Misc.                                                                                      |
| Cluster 02 & 12 | 10605792 | Spin4            | 4.39  | Misc.                                                                                      |
| Cluster 02 & 12 | 10356866 | Pdcd1 (PD1)      | 13.60 | Misc.                                                                                      |
| Cluster 02 & 12 | 10442224 | Zfp948           | 2.07  | Misc.                                                                                      |
| Cluster 02 & 12 | 10544732 | Skap2            | 2.34  | Misc.                                                                                      |
| Cluster 02 & 12 | 10587829 | Plod2            | 8.37  | Oxygenase                                                                                  |
| Cluster 02 & 12 | 10571321 | Ppp1r3b          | 3.64  | Phosphatase modulator                                                                      |
| Cluster 02 & 12 | 10463168 | Pgam1            | 2.46  | Phosphoglycerate mutase activity                                                           |
| Cluster 02 & 12 | 10561302 | Pgam1            | 2.46  | Phosphoglycerate mutase activity                                                           |
| Cluster 02 & 12 | 10497321 | Pgam1            | 2.65  | Phosphoglycerate mutase activity                                                           |
| Cluster 02 & 12 | 10513154 | Ptpn3            | 3.08  | Protein phosphatase                                                                        |
| Cluster 02 & 12 | 10407126 | Plk2             | 5.04  | Protein serine/threonine kinase activity                                                   |
| Cluster 02 & 12 | 10435704 | Cd80             | 4.95  | Receptor                                                                                   |
| Cluster 02 & 12 | 10404422 | Serpinh6b        | 2.73  | Serine protease inhibitor                                                                  |
| Cluster 02 & 12 | 10404429 | Serpinh9         | 3.69  | Serine protease inhibitor                                                                  |
| Cluster 02 & 12 | 10503334 | Gem              | 4.87  | Small GTPase                                                                               |
| Cluster 02 & 12 | 10536472 | Mdfic            | 2.15  | Transcription factor                                                                       |
| Cluster 02 & 12 | 10437687 | Litaf            | 7.45  | Transcription factor                                                                       |
| Cluster 02 & 12 | 10391301 | Stat3            | 2.24  | Transcription factor, nucleic acid binding                                                 |
| Cluster 02 & 12 | 10422227 | Spry2            | 4.87  | Transcription factor, signaling molecule                                                   |
| Cluster 02 & 12 | 10356082 | Plscr1           | 4.12  | Transfer/carrier protein                                                                   |
| Cluster 02 & 12 | 10511282 | Tnfrsf4          | 10.45 | Tumor necrosis factor receptor                                                             |
| Cluster 02 & 12 | 10545135 | Il12rb2          | 4.48  | Type I cytokine receptor, defense/immunity protein                                         |
| Cluster 02 & 12 | 10462454 | Uhrf2            | 2.50  | Ubiquitin-protein ligase                                                                   |
| Cluster 02 & 13 | 10447190 | Plekhh2          | 2.45  | Actin binding                                                                              |
| Cluster 02 & 13 | 10594661 | Tpm1             | 2.36  | Actin binding motor protein                                                                |
| Cluster 02 & 13 | 10408870 | Tbc1d7           | 2.59  | Activation of GTPase activity, negative regulation of TOR signaling                        |
| Cluster 02 & 13 | 10379518 | Ccl7             | 5.67  | Chemokine                                                                                  |
| Cluster 02 & 13 | 10415844 | Ctsb/Fdft1       | 2.40  | Cysteine protease                                                                          |
| Cluster 02 & 13 | 10488415 | Cst3             | 2.70  | Cysteine protease inhibitor                                                                |
| Cluster 02 & 13 | 10437639 | Emp2             | 6.66  | Cytoskeletal protein                                                                       |
| Cluster 02 & 13 | 10497001 | Cryz             | 3.11  | Dehydrogenase, reductase                                                                   |
| Cluster 02 & 13 | 10476362 | Mcm8             | 2.16  | DNA helicase, hydrolase                                                                    |
| Cluster 02 & 13 | 10534974 | Mcm7             | 2.71  | DNA helicase, hydrolase                                                                    |
| Cluster 02 & 13 | 10417273 | Esd              | 2.56  | Esterase                                                                                   |
| Cluster 02 & 13 | 10493259 | Ssr2             | 2.41  | G-protein coupled receptor                                                                 |
| Cluster 02 & 13 | 10539861 | Rpn1             | 2.46  | Glycosyltransferase                                                                        |
| Cluster 02 & 13 | 10555041 | Alg8             | 2.63  | Glycosyltransferase                                                                        |
| Cluster 02 & 13 | 10466521 | Gent1            | 8.92  | Glycosyltransferase                                                                        |
| Cluster 02 & 13 | 10386058 | Sparc            | 8.39  | Growth factor, extracellular matrix glycoprotein, cell adhesion molecule                   |
| Cluster 02 & 13 | 10481518 | Ptges            | 6.98  | Isomerase                                                                                  |
| Cluster 02 & 13 | 10432243 | Fkbp11           | 2.65  | Isomerase, chaperone, calcium-binding protein                                              |
| Cluster 02 & 13 | 10367436 | Cd63             | 79.88 | Membrane-bound signaling molecule, receptor                                                |
| Cluster 02 & 13 | 10574023 | Mt2              | 7.84  | Metal ion binding                                                                          |
| Cluster 02 & 13 | 10467979 | Scd1             | 21.69 | Metal ion binding, palmitoyl-CoA 9-desaturase activity, stearoyl-CoA 9-desaturase activity |
| Cluster 02 & 13 | 10393559 | Timp2            | 5.22  | Metalloprotease inhibitor                                                                  |
| Cluster 02 & 13 | 10372410 | Glipr1/Krr1      | 2.00  | Misc.                                                                                      |
| Cluster 02 & 13 | 10554281 | Fanci/Polg       | 2.19  | Misc.                                                                                      |
| Cluster 02 & 13 | 10419223 | Fermt2           | 2.21  | Misc.                                                                                      |
| Cluster 02 & 13 | 10460603 | Efemp2           | 2.25  | Misc.                                                                                      |
| Cluster 02 & 13 | 10538617 | Lancel2          | 2.26  | Misc.                                                                                      |
| Cluster 02 & 13 | 10528143 | Ppp1r14b         | 2.29  | Misc.                                                                                      |
| Cluster 02 & 13 | 10497548 | Fndc3b           | 2.64  | Misc.                                                                                      |

|                 |          |                   |       |                                                                               |
|-----------------|----------|-------------------|-------|-------------------------------------------------------------------------------|
| Cluster 02 & 13 | 10465895 | Fads2             | 2.79  | Misc.                                                                         |
| Cluster 02 & 13 | 10585338 | Kdelc2            | 2.92  | Misc.                                                                         |
| Cluster 02 & 13 | 10472916 | Cdca7             | 2.96  | Misc.                                                                         |
| Cluster 02 & 13 | 10398240 | Eml1              | 3.03  | Misc.                                                                         |
| Cluster 02 & 13 | 10480381 | Arhgap21          | 3.20  | Misc.                                                                         |
| Cluster 02 & 13 | 10421029 | Cdca2             | 3.62  | Misc.                                                                         |
| Cluster 02 & 13 | 10485622 | Qser1             | 4.00  | Misc.                                                                         |
| Cluster 02 & 13 | 10603346 | Plp2/Prickle3     | 5.01  | Misc.                                                                         |
| Cluster 02 & 13 | 10436106 | C330027C09Rik     | 5.16  | Misc.                                                                         |
| Cluster 02 & 13 | 10569707 | Myadm             | 5.50  | Misc.                                                                         |
| Cluster 02 & 13 | 10450374 | D17H6S56E-5 (G7e) | 5.83  | Misc.                                                                         |
| Cluster 02 & 13 | 10466606 | Anxa1             | 6.74  | Misc.                                                                         |
| Cluster 02 & 13 | 10553299 | Ifitm2            | 7.15  | Misc.                                                                         |
| Cluster 02 & 13 | 10591781 | Anln              | 7.76  | Misc.                                                                         |
| Cluster 02 & 13 | 10383756 | Ifitm2            | 7.94  | Misc.                                                                         |
| Cluster 02 & 13 | 10569014 | Ifitm2            | 10.27 | Misc.                                                                         |
| Cluster 02 & 13 | 10558769 | Ifitm1            | 12.93 | Misc.                                                                         |
| Cluster 02 & 13 | 10569017 | Ifitm3            | 14.75 | Misc.                                                                         |
| Cluster 02 & 13 | 10384373 | Fignl1            | 4.64  | Non-motor microtubule binding protein                                         |
| Cluster 02 & 13 | 10504672 | Tdrd7             | 2.14  | Nuclease                                                                      |
| Cluster 02 & 13 | 10418171 | Zcchc24           | 3.45  | Nuclease                                                                      |
| Cluster 02 & 13 | 10476989 | Gins1             | 4.82  | Nucleic acid binding                                                          |
| Cluster 02 & 13 | 10563883 | Depdc1a           | 7.02  | Nucleic acid binding                                                          |
| Cluster 02 & 13 | 10497122 | Depdc1a           | 7.39  | Nucleic acid binding                                                          |
| Cluster 02 & 13 | 10524621 | Oas2              | 2.84  | Nucleotidyltransferase, nucleic acid binding, defense/immunity protein        |
| Cluster 02 & 13 | 10471721 | Ptgs1             | 8.34  | Oxygenase                                                                     |
| Cluster 02 & 13 | 10484318 | Nckap1            | 3.54  | Protein complex binding, contributes to Rac GTPase binding                    |
| Cluster 02 & 13 | 10458382 | Cd14              | 5.34  | Receptor                                                                      |
| Cluster 02 & 13 | 10474671 | Spred1            | 6.78  | Receptor                                                                      |
| Cluster 02 & 13 | 10352905 | Cd34              | 13.31 | Receptor                                                                      |
| Cluster 02 & 13 | 10510546 | Eno1/Gm5506       | 2.65  | RNA binding, phosphopyruvate hydratase activity                               |
| Cluster 02 & 13 | 10355403 | Fn1               | 26.38 | Signaling molecule                                                            |
| Cluster 02 & 13 | 10551638 | Lgals7            | 5.72  | Signaling molecule, cell adhesion molecule                                    |
| Cluster 02 & 13 | 10391339 | Psmc3ip           | 2.53  | Signaling molecule, DNA-binding protein, enzyme modulator                     |
| Cluster 02 & 13 | 10525983 | Ran               | 2.30  | Small GTPase                                                                  |
| Cluster 02 & 13 | 10523281 | Sept11            | 2.74  | Small GTPase, cytoskeletal protein                                            |
| Cluster 02 & 13 | 10469322 | Vim/LOC100862060  | 2.20  | Structural molecule activity                                                  |
| Cluster 02 & 13 | 10564343 | Tjp1              | 5.52  | Tight junction                                                                |
| Cluster 02 & 13 | 10385716 | 0610009B22Rik     | 2.56  | Transcription regulator                                                       |
| Cluster 02 & 13 | 10377790 | Slc16a11          | 2.45  | Transporter                                                                   |
| Cluster 02 & 14 | 10572932 | Naa20             | 2.07  | Acetyltransferase                                                             |
| Cluster 02 & 14 | 10476775 | Naa20             | 2.13  | Acetyltransferase                                                             |
| Cluster 02 & 14 | 10350136 | Csrp1             | 2.25  | Actin family cytoskeletal protein                                             |
| Cluster 02 & 14 | 10447317 | Epas1             | 3.93  | Basic helix-loop-helix transcription factor, nucleic acid binding             |
| Cluster 02 & 14 | 10592266 | Slc37a2           | 3.78  | Cation transporter                                                            |
| Cluster 02 & 14 | 10531407 | Cxcl9             | 4.24  | Chemokine                                                                     |
| Cluster 02 & 14 | 10571696 | Casp3             | 3.47  | Cysteine protease, protease inhibitor                                         |
| Cluster 02 & 14 | 10393047 | Galk1/Itgb4       | 2.66  | Galactokinase activity                                                        |
| Cluster 02 & 14 | 10531737 | Hpse              | 9.61  | Glycosidase                                                                   |
| Cluster 02 & 14 | 10403743 | Inhba             | 2.66  | Growth factor                                                                 |
| Cluster 02 & 14 | 10344713 | Ahey              | 2.14  | Hydrolase                                                                     |
| Cluster 02 & 14 | 10488816 | Ahey              | 2.18  | Hydrolase                                                                     |
| Cluster 02 & 14 | 10439762 | Ahey              | 2.26  | Hydrolase                                                                     |
| Cluster 02 & 14 | 10521832 | Pi4k2b            | 2.42  | Kinase                                                                        |
| Cluster 02 & 14 | 10353899 | Sema4c            | 2.19  | Membrane-bound signaling molecule                                             |
| Cluster 02 & 14 | 10369431 | Adams14           | 2.73  | Metalloprotease, extracellular matrix glycoprotein, serine protease inhibitor |
| Cluster 02 & 14 | 10608652 | 10608652          | 2.08  | Misc.                                                                         |
| Cluster 02 & 14 | 10458794 | Ccdc112           | 2.12  | Misc.                                                                         |
| Cluster 02 & 14 | 10425966 | Atxn10            | 2.17  | Misc.                                                                         |
| Cluster 02 & 14 | 10593913 | 1700017B05Rik     | 2.26  | Misc.                                                                         |
| Cluster 02 & 14 | 10461439 | Fads1             | 2.29  | Misc.                                                                         |
| Cluster 02 & 14 | 10585610 | Ptpn9/Gm10658     | 2.34  | Misc.                                                                         |
| Cluster 02 & 14 | 10406733 | Zbed3             | 2.35  | Misc.                                                                         |
| Cluster 02 & 14 | 10488589 | Fam110a           | 2.53  | Misc.                                                                         |
| Cluster 02 & 14 | 10450519 | Tcf19             | 2.67  | Misc.                                                                         |
| Cluster 02 & 14 | 10479379 | Slco4a1           | 2.68  | Misc.                                                                         |
| Cluster 02 & 14 | 10467907 | Erlin1            | 2.74  | Misc.                                                                         |

|                 |          |                       |       |                                                                                                                                                                                                                               |
|-----------------|----------|-----------------------|-------|-------------------------------------------------------------------------------------------------------------------------------------------------------------------------------------------------------------------------------|
| Cluster 02 & 14 | 10495935 | 4930422G04Rik (Zgrf1) | 2.76  | Misc.                                                                                                                                                                                                                         |
| Cluster 02 & 14 | 10527920 | Cyp51                 | 2.78  | Misc.                                                                                                                                                                                                                         |
| Cluster 02 & 14 | 10506822 | Orc1                  | 2.78  | Misc.                                                                                                                                                                                                                         |
| Cluster 02 & 14 | 10441864 | Mllt4                 | 2.92  | Misc.                                                                                                                                                                                                                         |
| Cluster 02 & 14 | 10540738 | Fancd2                | 3.00  | Misc.                                                                                                                                                                                                                         |
| Cluster 02 & 14 | 10361110 | Dtl                   | 3.05  | Misc.                                                                                                                                                                                                                         |
| Cluster 02 & 14 | 10459071 | 2010002N04Rik (Smim3) | 3.14  | Misc.                                                                                                                                                                                                                         |
| Cluster 02 & 14 | 10550906 | Plaur (CD87)          | 3.58  | Misc.                                                                                                                                                                                                                         |
| Cluster 02 & 14 | 10355567 | Tmbim1                | 3.76  | Misc.                                                                                                                                                                                                                         |
| Cluster 02 & 14 | 10426689 | Spats2                | 3.94  | Misc.                                                                                                                                                                                                                         |
| Cluster 02 & 14 | 10532669 | 2900026A02Rik         | 4.12  | Misc.                                                                                                                                                                                                                         |
| Cluster 02 & 14 | 10502816 | Gipc2/D630002J18Rik   | 4.39  | Misc.                                                                                                                                                                                                                         |
| Cluster 02 & 14 | 10406581 | Dhfr/Msh3             | 4.57  | Misc.                                                                                                                                                                                                                         |
| Cluster 02 & 14 | 10460738 | Cdca5                 | 4.99  | Misc.                                                                                                                                                                                                                         |
| Cluster 02 & 14 | 10530615 | Ociad2                | 5.67  | Misc.                                                                                                                                                                                                                         |
| Cluster 02 & 14 | 10571312 | Dusp4                 | 6.55  | Misc.                                                                                                                                                                                                                         |
| Cluster 02 & 14 | 10411459 | Tmem171               | 7.33  | Misc.                                                                                                                                                                                                                         |
| Cluster 02 & 14 | 10357579 | Mapkapk2              | 2.42  | Non-receptor serine/threonine protein kinase, non-motor microtubule binding protein                                                                                                                                           |
| Cluster 02 & 14 | 10535979 | Rfc3                  | 3.52  | Nucleotidyltransferase, DNA-directed DNA polymerase                                                                                                                                                                           |
| Cluster 02 & 14 | 10419198 | Ero1l                 | 3.02  | Oxidoreductase                                                                                                                                                                                                                |
| Cluster 02 & 14 | 10463355 | Scd2                  | 6.47  | Palmitoyl-CoA 9-desaturase activity, stearoyl-CoA 9-desaturase activity                                                                                                                                                       |
| Cluster 02 & 14 | 10452047 | Ptprs                 | 2.98  | Protein phosphatase                                                                                                                                                                                                           |
| Cluster 02 & 14 | 10491805 | Plk4                  | 2.66  | Protein serine/threonine kinase activity                                                                                                                                                                                      |
| Cluster 02 & 14 | 10374464 | Spred2                | 2.83  | Receptor                                                                                                                                                                                                                      |
| Cluster 02 & 14 | 10439527 | Tigit                 | 3.68  | Receptor, defense/immunity protein                                                                                                                                                                                            |
| Cluster 02 & 14 | 10403584 | Nid1                  | 2.50  | Receptor, extracellular matrix glycoprotein                                                                                                                                                                                   |
| Cluster 02 & 14 | 10358816 | Lamc1                 | 2.95  | Receptor, extracellular matrix linker protein                                                                                                                                                                                 |
| Cluster 02 & 14 | 10420302 | Gzmc                  | 54.76 | serine protease                                                                                                                                                                                                               |
| Cluster 02 & 14 | 10469151 | Itih5                 | 9.86  | Serine protease inhibitor                                                                                                                                                                                                     |
| Cluster 02 & 14 | 10379262 | Nfl                   | 2.45  | Signaling molecule, G-protein modulator                                                                                                                                                                                       |
| Cluster 02 & 14 | 10409660 | Gkap1                 | 2.74  | Structural protein                                                                                                                                                                                                            |
| Cluster 02 & 14 | 10455813 | Lmb1                  | 2.27  | Structural protein, intermediate filament                                                                                                                                                                                     |
| Cluster 02 & 14 | 10549222 | Bcat1                 | 6.18  | Transaminase                                                                                                                                                                                                                  |
| Cluster 02 & 14 | 10408321 | Gmn                   | 2.46  | Transcription corepressor activity                                                                                                                                                                                            |
| Cluster 02 & 14 | 10576639 | Nrp1                  | 2.13  | Transporter, apolipoprotein, membrane-bound signaling molecule, receptor, metalloprotease, serine protease, oxidase, metalloprotease, serine protease, extracellular matrix protein, enzyme modulator, cell adhesion molecule |
| Cluster 02 & 14 | 10556216 | Ipo7                  | 2.09  | Transporter, small GTPase                                                                                                                                                                                                     |
| Cluster 02 & 14 | 10519488 | Tubb4b                | 2.09  | Tubulin                                                                                                                                                                                                                       |



**Supplemental Table 3. The molecular profile of TIL consists of 1164 differentially expressed genes between all tumor-specific CD8<sup>+</sup> T cells from the tumor (TIL<sub>TOT</sub>) and spleen (SP<sub>TOT</sub>) from Figure 2A.** Differentially-expressed genes were narrowed as described in Figure 4 to determine the molecular profile of TASPRL TIL. The gene list is ordered by K-means cluster (Figure 5A), gene type, and fold-change. Genes without a definitive gene type were labeled “Misc.” for miscellaneous.
